# Supplementary material for: Diastereoselective synthesis of cyclopentene spiro-rhodanines containing three contiguous stereocenters via phosphine-catalyzed [3 + 2] cycloaddition or one-pot sequential [3 + 2]/[3 + 2] cycloaddition
Source: Royal Society of Chemistry journal article supplement (doi:10.1039/c6ra23399f), 2016-01-01
Supplement: c6ra23399f1.pdf [file c6ra23399f1.pdf]

**Diastereoselective Synthesis of Cyclopentene Spiro-rhodanines Containing Three  
Contiguous Stereocenters *via* Phosphine-catalyzed [3+2] Cycloaddition or One-pot  
Sequential [3+2]/[3+2] Cycloaddition**

Jiarong Zhang,<sup>a</sup> Minxuan Zhang,<sup>a</sup> Yuming Li,<sup>a</sup> Shuang Liu,<sup>a</sup> and Zhiwei Miao<sup>\*,a,b</sup>

<sup>a</sup> State Key Laboratory and Institute of Elemento-Organic Chemistry, Nankai University, Weijin Road  
94, Tianjin 300071 (P. R. China)

<sup>b</sup> Collaborative Innovation Center of Chemical Science and Engineering (Tianjin), Nankai University,  
Weijin Road 94, Tianjin 300071 (P. R. China) *Fax:* (+86)-22-2350-2351; *e-mail:*

[miaozhiwei@nankai.edu.cn](mailto:miaozhiwei@nankai.edu.cn)

## Supporting Information

### List of contents (pages)

|                                                                                                   |     |
|---------------------------------------------------------------------------------------------------|-----|
| 1. General comments.....                                                                          | S1  |
| 2. General procedure for formal [3+2] cycloaddition reaction for products <b>3</b> .....          | S1  |
| 3. General procedure for one-pot sequential [3+2]/[3+2] cycloaddition for products <b>7</b> ..... | S35 |
| 4. X-ray crystal structure of <b>31</b> .....                                                     | S47 |

#### General Comments:

All reactions were performed under N<sub>2</sub> atmosphere in oven-dried glassware with magnetic stirring. Solvents were dried and distilled prior to use according to the standard methods. Unless otherwise indicated, all materials were obtained from commercial sources, and used as purchased without dehydration. Flash column chromatography was performed on silica gel (particle size 10-40 μm, Ocean Chemical Factory of Qingdao, China). Nitrogen gas (99.999%) was purchased from Boc Gas Inc. <sup>1</sup>H NMR, <sup>13</sup>C NMR and <sup>19</sup>F NMR spectra were recorded in CDCl<sub>3</sub> at Bruker 400 MHz spectrometers, TMS served as internal standard (δ = 0 ppm) for <sup>1</sup>H NMR and <sup>13</sup>C NMR. HR-MS were recorded on APEXII and ZAB-HS spectrometer.

#### General procedure for formal [3+2] cycloaddition reaction for products **3**:

Under a nitrogen atmosphere, to a mixture of 5-arylidene-3-(*tert*-butyl)-2-thioxothiazolidin-4-one **2** (0.1 mmol, 1.0 equiv), and Bu<sub>3</sub>P (4.1 mg, 0.02 mmol, 20 mmol%) was added toluene (1 mL) *via* a syringe and allowed to stir for 5 min at room temperature. Ethyl alkynoate **1** (0.15 mmol, 1.5 equiv.) was added and the reaction was allowed to stir for 24 h at room temperature. The reaction was monitored by TLC spectroscopy. After the reaction was completed, the reaction mixture was directly purified by flash column chromatograph (eluted with 20:1 petroleum ether/EtOAc) to afford the product **3**.

**Ethyl 9-benzyl-3-(tert-butyl)-4-oxo-6-phenyl-2-thioxo-1-thia-3-azaspiro[4.4]non-7-ene-7-**

**carboxylate (3a):**

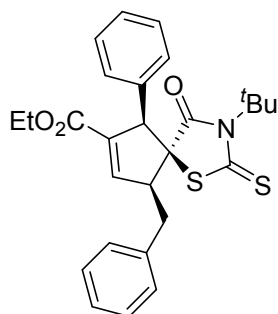

Yellow oil (45.6 mg, 95% yield); <sup>1</sup>H NMR (400 MHz, CDCl<sub>3</sub>): δ 7.34-7.26 (m, 5H), 7.22 (d, *J* = 6.8 Hz, 3H), 7.01 (dd, *J* = 7.4, 1.9 Hz 2H), 6.77 (t, *J* = 2.3 Hz, 1H), 4.76 (t, *J* = 2.1 Hz, 1H), 4.12-3.95 (m, 2H), 3.95-3.85 (m 1H), 2.99 (dd, *J* = 13.8, 8.3 Hz, 1H), 2.90 (dd, *J* = 13.8, 8.3 Hz, 1H), 1.61 (s, 9H), 1.05 (t, *J* = 7.1 Hz, 3H); <sup>13</sup>C NMR (101 MHz, CDCl<sub>3</sub>): δ 200.5, 179.0, 163.7, 144.4, 137.6,

136.8, 135.8, 129.2, 128.8, 128.7, 128.3, 128.0, 126.8, 73.1, 65.1, 60.7, 60.3, 54.5, 38.0, 28.8, 13.9;

HRMS (ESI): *m/z* calcd for C<sub>27</sub>H<sub>30</sub>NO<sub>3</sub>S<sub>2</sub> [M+H]<sup>+</sup> 480.1662, found 480.1664.

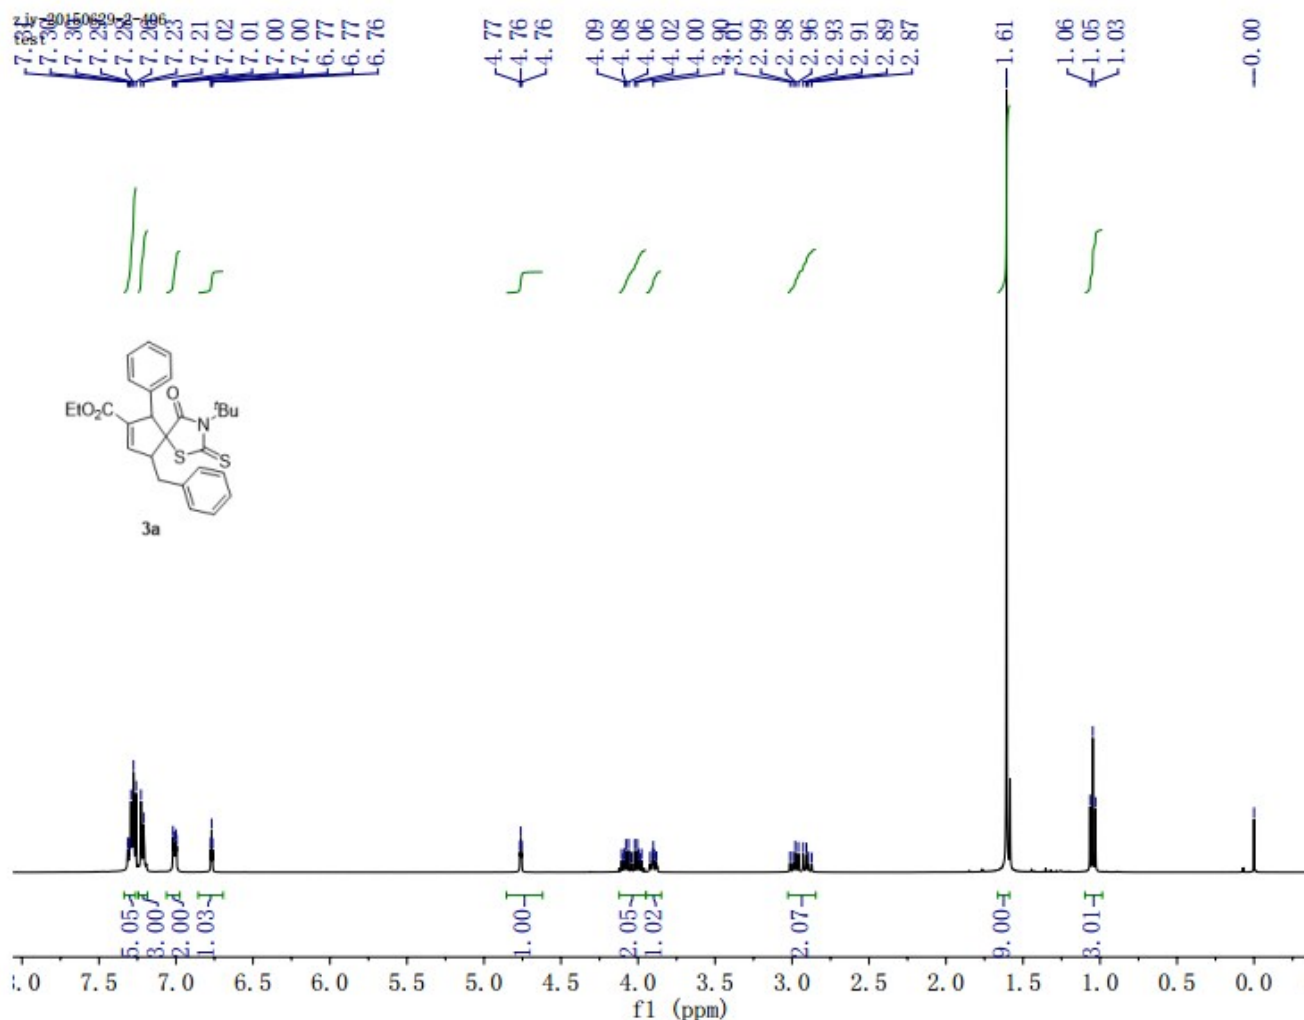

zjy-20150824-4 (405)  
C13CPD

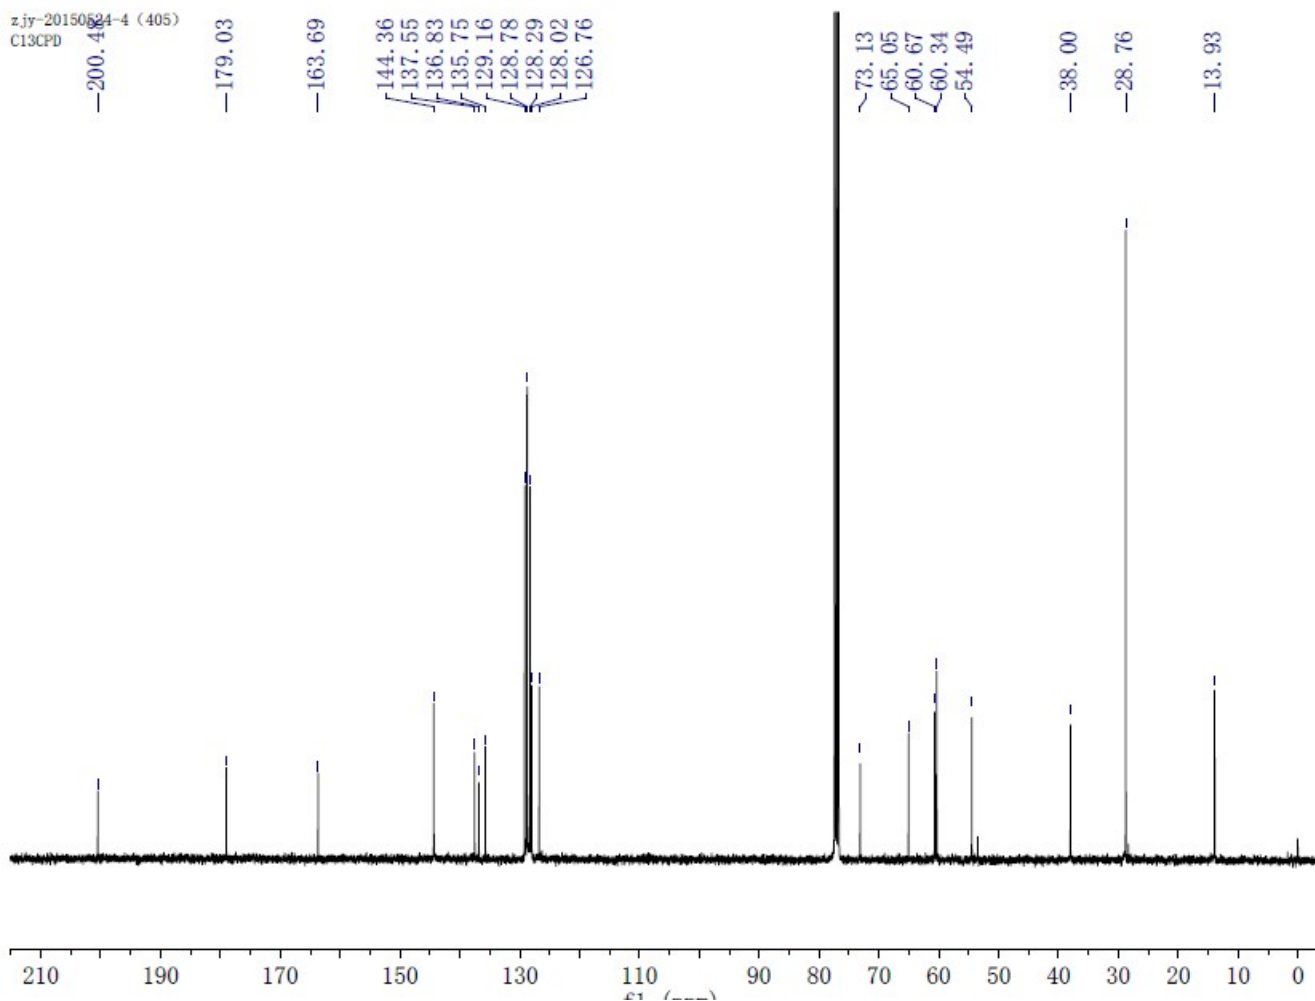

**Ethyl 9-benzyl-6-(2-bromophenyl)-3-(tert-butyl)-4-oxo-2-thioxo-1-thia-3-azaspiro[4.4]non-7-ene-7-carboxylate (3b):**

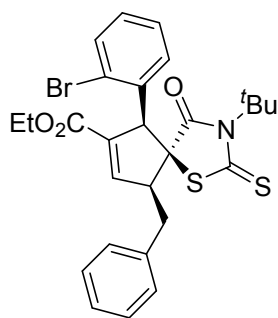

Yellow oil (51.4mg, 92% yield);  $^1\text{H}$  NMR (400 MHz,  $\text{CDCl}_3$ ):  $\delta$  7.59 (dd,  $J = 8.0, 1.2$  Hz, 1H), 7.36-7.26 (m, 3H), 7.26-7.19 (m, 3H), 7.16 (dd,  $J = 7.8, 1.6$  Hz, 1H), 6.98 (dd,  $J = 7.7, 1.6$  Hz, 1H), 6.85 (t,  $J = 2.3$  Hz, 1H), 5.26 (d,  $J = 0.9$  Hz, 1H), 4.11-3.93 (m, 2H), 3.83-3.71 (m, 1H), 3.08 (dd,  $J = 13.5, 6.8$  Hz, 1H), 2.63 (dd,  $J = 13.5, 10.2$  Hz, 1H), 1.76 (s, 9H), 1.03 (t,  $J = 7.1$  Hz, 3H);  $^{13}\text{C}$

NMR (101 MHz,  $\text{CDCl}_3$ ):  $\delta$  201.0, 180.4, 163.1, 145.2, 138.3, 137.7, 135.4, 133.1, 129.4, 129.0, 128.9, 128.7, 127.6, 126.8, 126.7, 69.5, 65.4, 60.7, 58.4, 56.0, 39.4, 28.8, 13.9; HRMS (ESI):  $m/z$  calcd for  $\text{C}_{27}\text{H}_{29}\text{BrNO}_3\text{S}_2$   $[\text{M}+\text{H}]^+$  558.0767, found 558.0765.

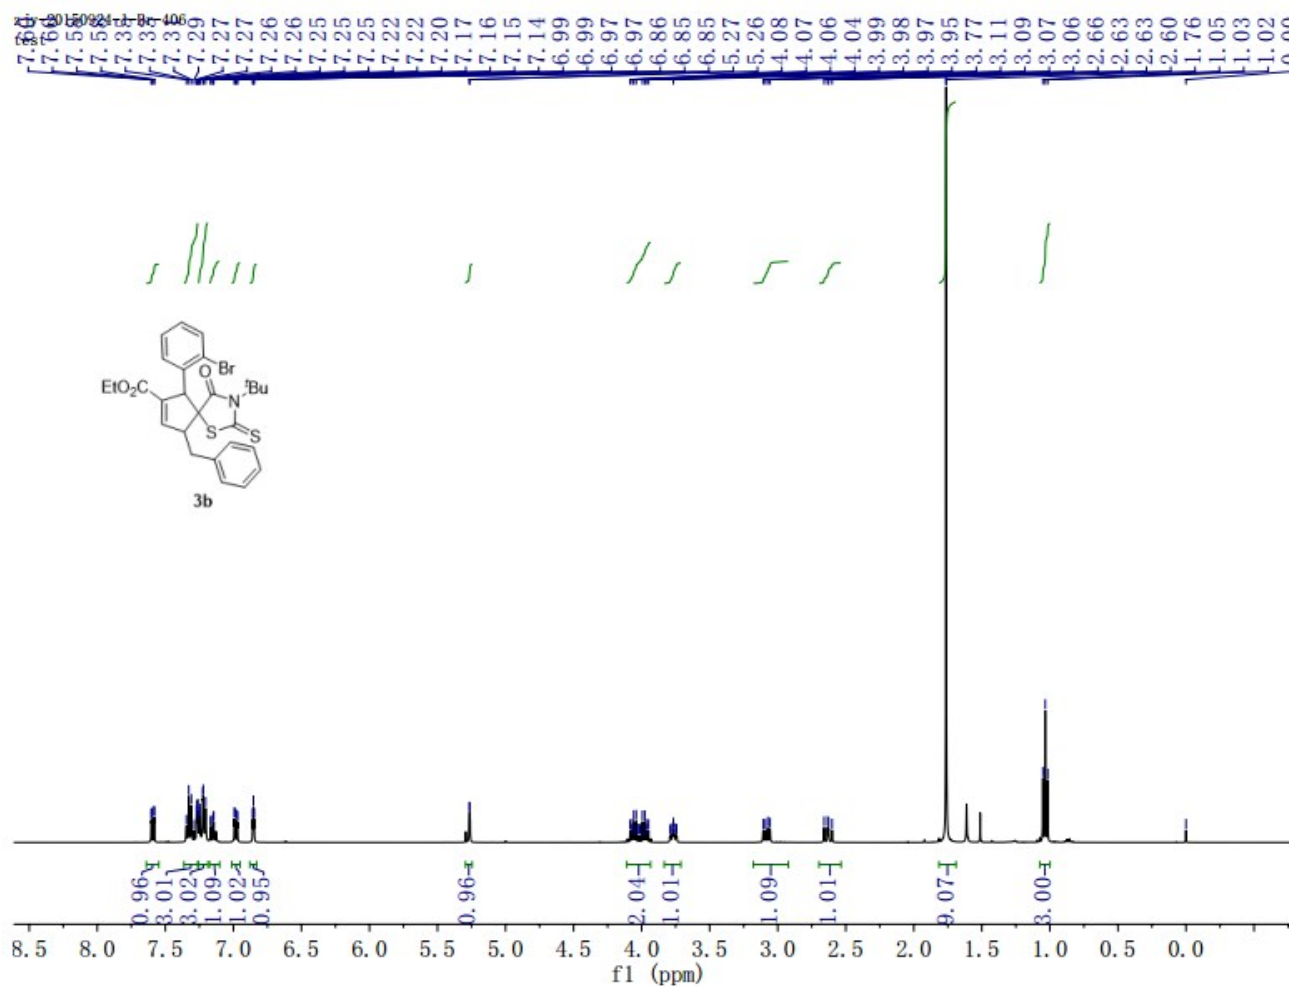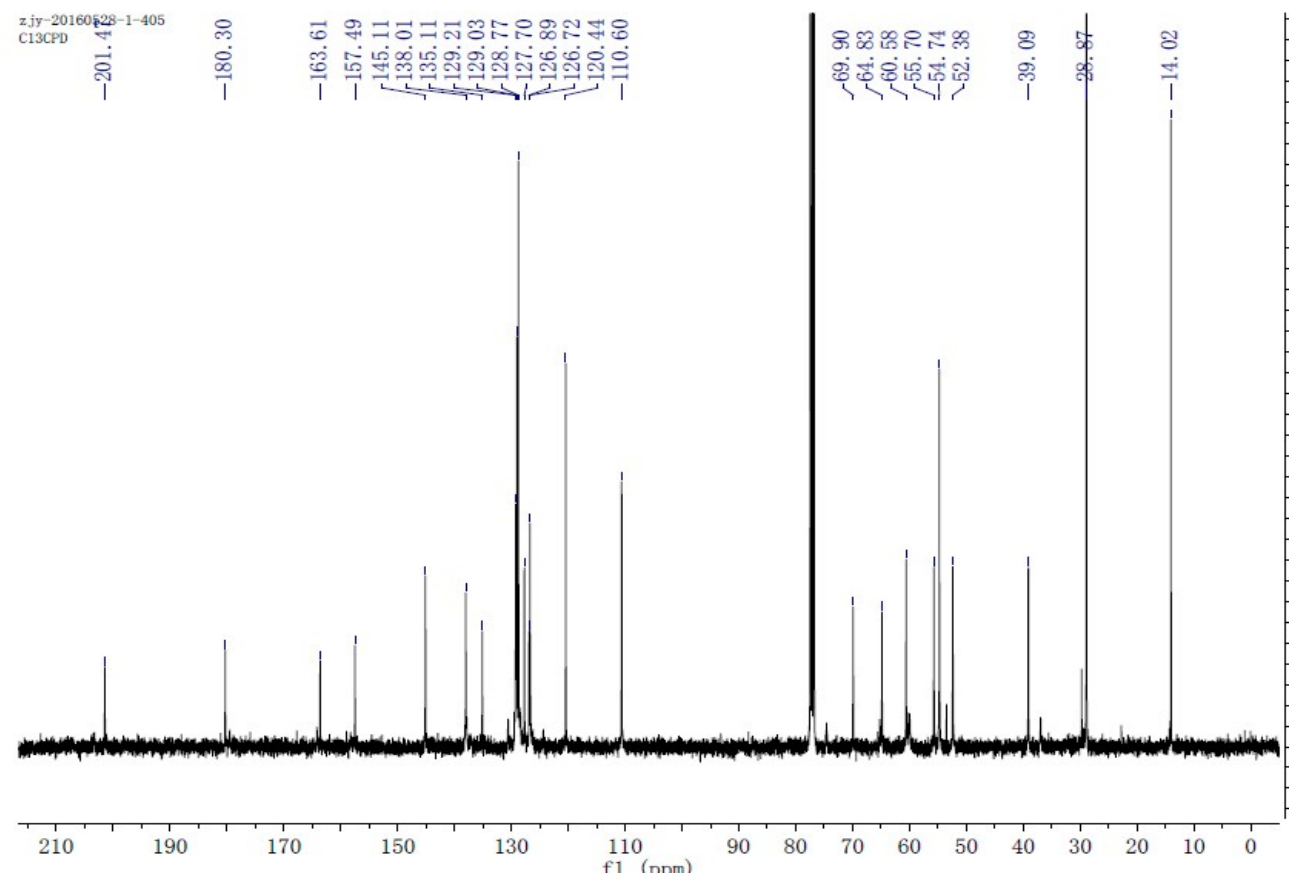

**Ethyl 9-benzyl-3-(tert-butyl)-6-(3-nitrophenyl)-4-oxo-2-thioxo-1-thia-3-azaspiro[4.4]non-7-ene-7-carboxylate (3c):**

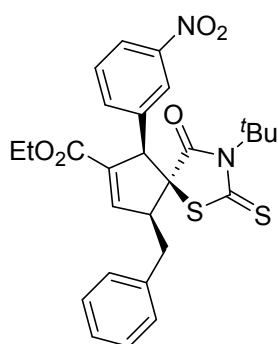

Yellow oil (50.4 mg, 96% yield);  $^1\text{H}$  NMR (400 MHz,  $\text{CDCl}_3$ ):  $\delta$  8.21-8.12 (m, 1H), 7.89 (t,  $J = 1.9$  Hz, 1H), 7.50 (t,  $J = 7.9$  Hz, 1H), 7.35-7.27 (m, 3H), 7.22 (d,  $J = 7.1$  Hz, 3H), 6.87 (t,  $J = 2.3$  Hz, 1H), 4.90 (t,  $J = 2.3$  Hz, 1H), 4.08-3.97 (m, 2H), 2.99 (d,  $J = 8.6$  Hz, 2H), 1.55 (s, 9H), 1.10 (t,  $J = 7.1$  Hz, 3H);  $^{13}\text{C}$

NMR (101 MHz,  $\text{CDCl}_3$ ):  $\delta$  199.3, 178.4, 163.2, 147.9, 146.1, 138.8, 137.0,

135.1, 134.3, 129.2, 128.9, 126.9, 123.5, 123.1, 73.3, 65.6, 61.0, 60.2, 54.5, 37.5, 28.8, 14.0; HRMS

(ESI):  $m/z$  calcd for  $\text{C}_{27}\text{H}_{29}\text{N}_2\text{O}_5\text{S}_2$   $[\text{M}+\text{H}]^+$ : 525.1512, found 525.1511.

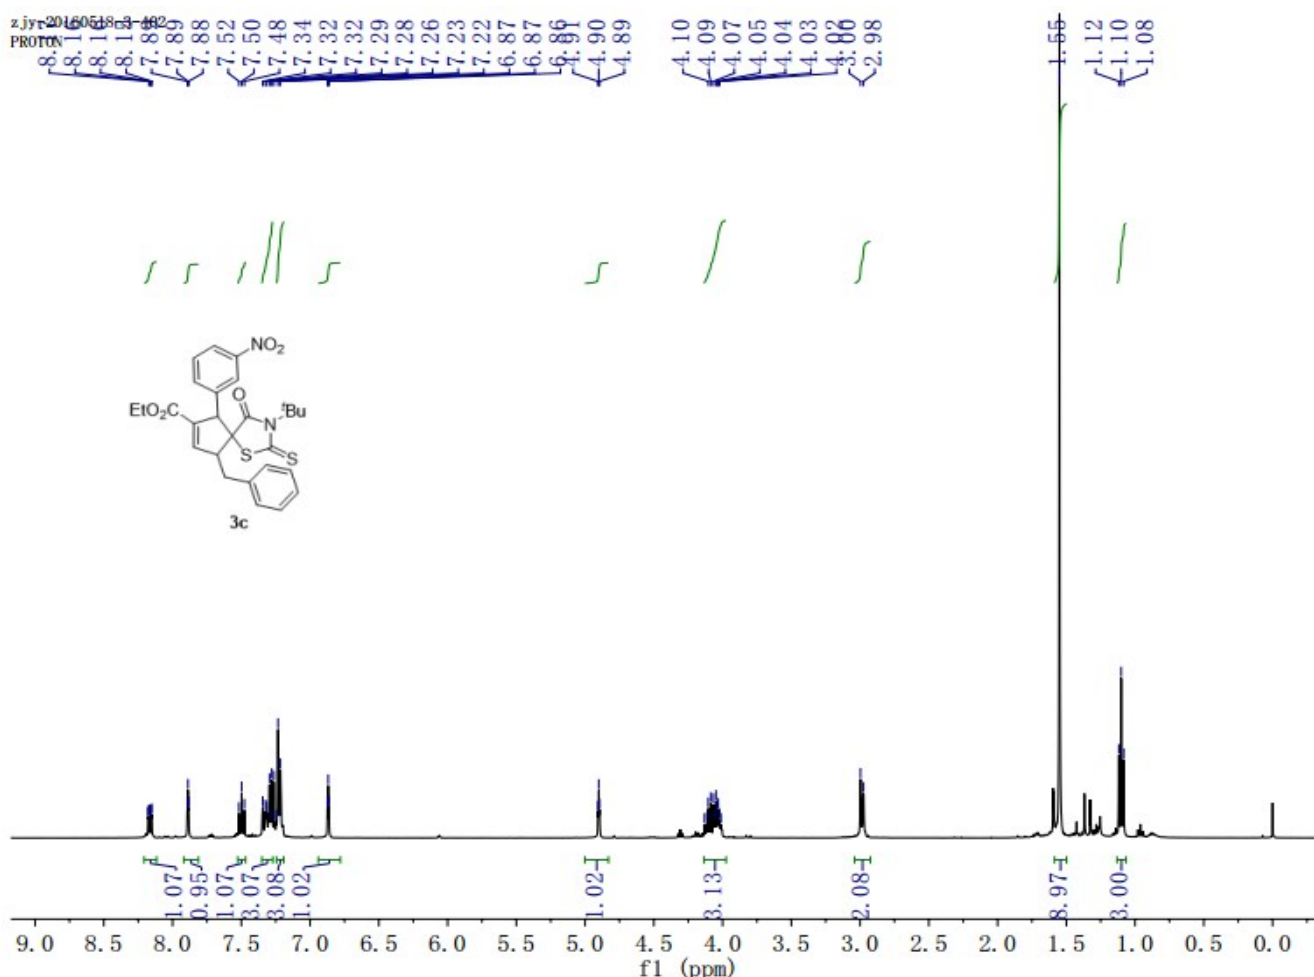

z.jy-20160518-3-402  
C13CPD

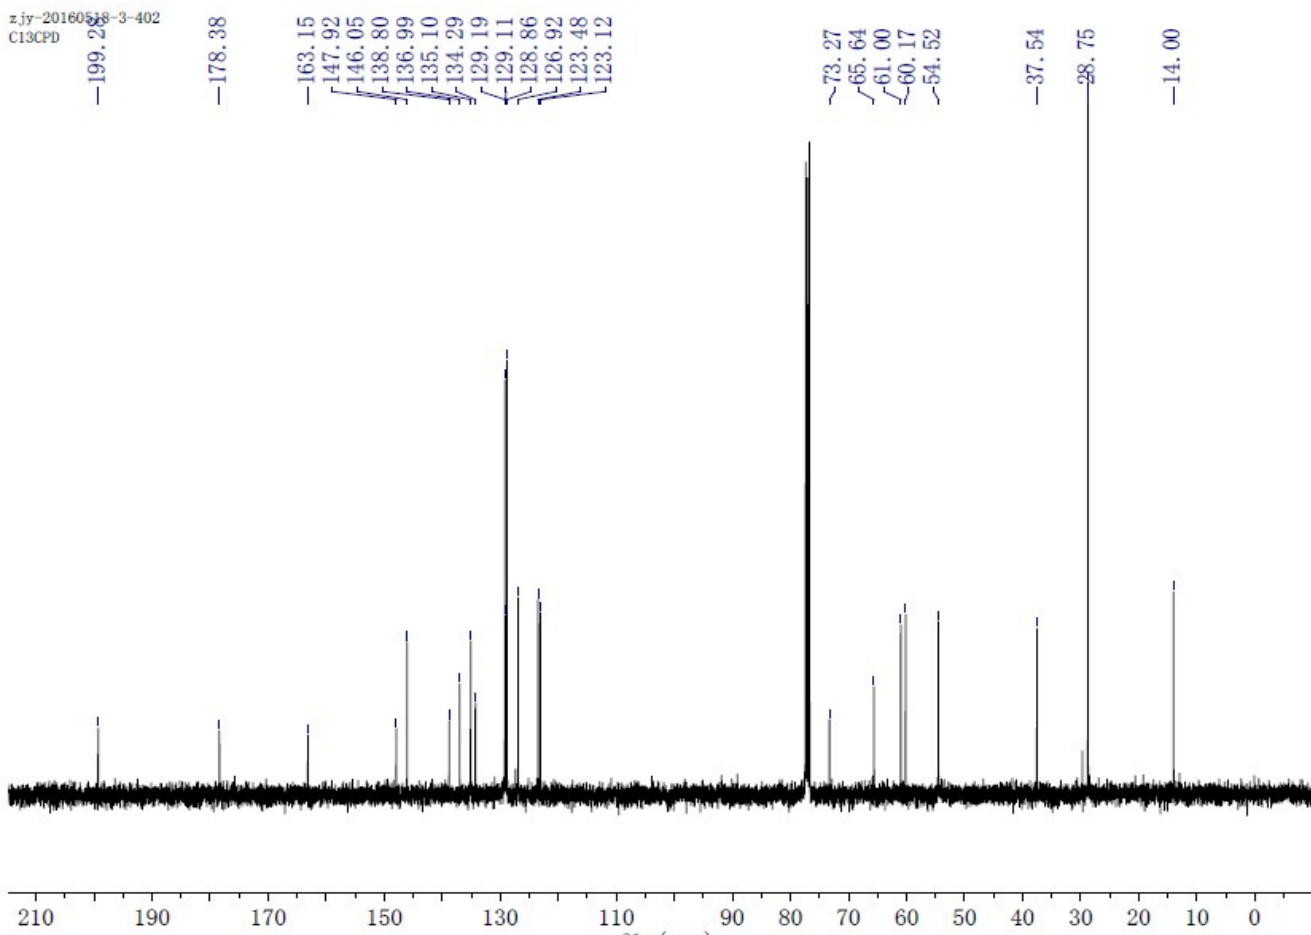

**Ethyl 9-benzyl-3-(tert-butyl)-4-oxo-2-thioxo-6-(3-(trifluoromethyl) phenyl)-1-thia-3-azaspiro [4.4]-non-7-ene-7-carboxylate (3d):**

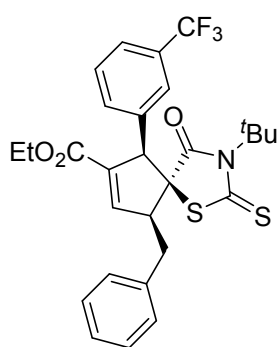

Yellow oil (53.7 mg, 98% yield);  $^1\text{H}$  NMR (400 MHz,  $\text{CDCl}_3$ ):  $\delta$  7.55 (d,  $J = 7.7$  Hz, 1H), 7.43 (t,  $J = 7.7$  Hz, 1H), 7.33-7.26 (m, 3H), 7.24-7.14 (m, 4H), 6.82 (s, 1H), 4.85 (s, 1H), 4.08 (d,  $J = 7.1$  Hz, 1H), 4.02 (dd,  $J = 7.1$  Hz, 6.9 Hz, 2H), 2.97 (d,  $J = 8.2$  Hz, 2H), 1.55 (s, 9H), 1.05 (t,  $J = 7.1$  Hz, 3H);  $^{13}\text{C}$  NMR (101 MHz,  $\text{CDCl}_3$ ):  $\delta$  199.7, 178.6, 163.4, 145.4, 137.7, 137.2, 134.9, 132.4, 129.2, 128.8, 128.7, 126.9, 125.4, 124.9, 124.9, 60.8, 73.5, 65.4, 60.8, 60.4, 54.5, 37.6, 28.7, 13.9;  $^{19}\text{F}$  NMR (376 MHz,  $\text{CDCl}_3$ ):  $\delta$  -62.59; HRMS (ESI):  $m/z$  calcd for  $\text{C}_{28}\text{H}_{29}\text{F}_3\text{NO}_3\text{S}_2$   $[\text{M}+\text{H}]^+$ : 548.1535, found 548.1535.

zjy-20160602-1-404  
PROTON

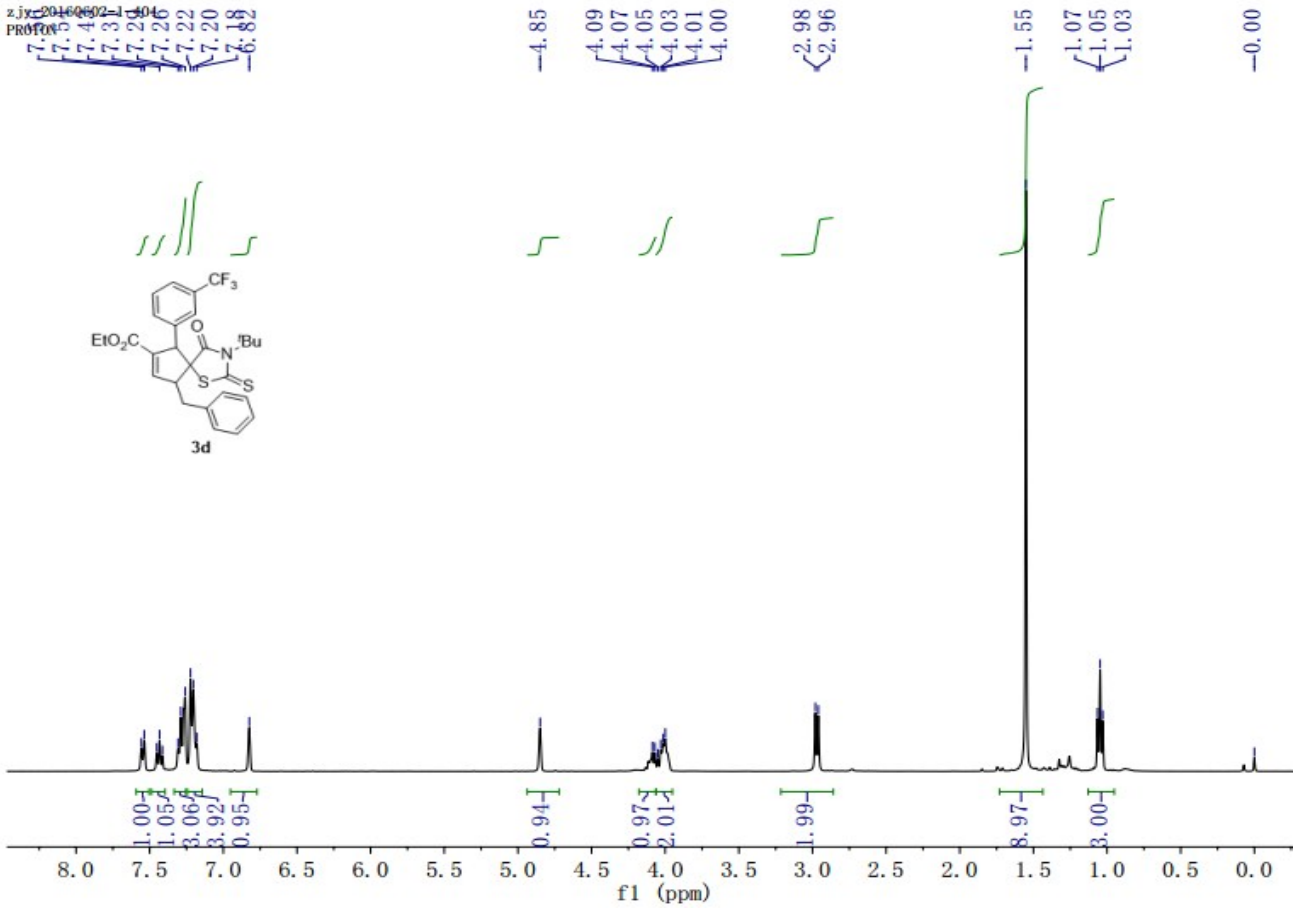

zjy-20160602-1-404  
C13CPD

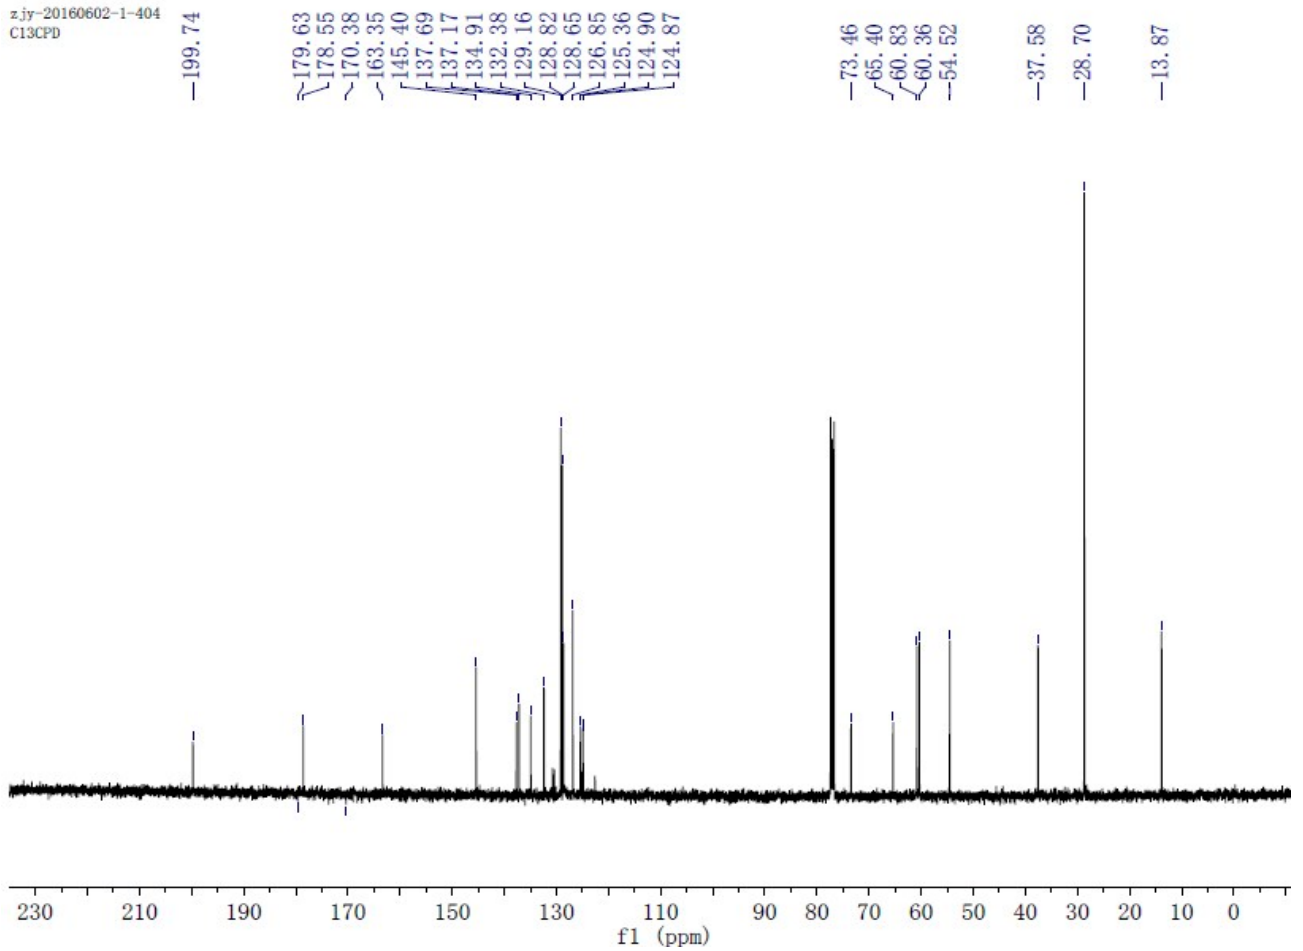



**Ethyl 9-benzyl-3-(tert-butyl)-6-(2-chlorophenyl)-4-oxo-2-thioxo-1-thia-3-azaspiro[4.4]non-7-ene-7-carboxylate (3e):**

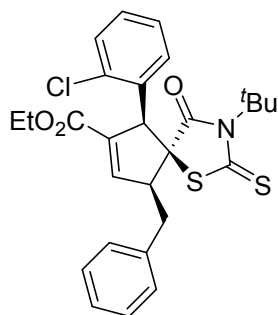

Yellow oil (48.8 mg, 95% yield);  $^1\text{H}$  NMR (400 MHz,  $\text{CDCl}_3$ ):  $\delta$  7.40 (dd,  $J = 5.7, 3.6$  Hz, 1H), 7.32 (t,  $J = 7.3$  Hz, 2H), 7.22 (dd,  $J = 8.3, 4.7$  Hz, 5H), 6.98 (dd,  $J = 5.8, 3.5$  Hz, 1H), 6.85 (t,  $J = 2.1$  Hz, 1H), 5.27 (s, 1H), 4.12-4.02 (m, 2H), 3.83 (dd,  $J = 12.1, 4.6$  Hz, 1H), 3.06 (dd,  $J = 13.5, 7.1$  Hz, 1H), 2.66 (dd,  $J = 13.5, 9.9$  Hz, 1H), 1.74 (s, 9H), 1.03 (t,  $J = 7.1$  Hz, 3H);  $^{13}\text{C}$  NMR (101 MHz,  $\text{CDCl}_3$ ):  $\delta$  200.8, 180.1, 163.2, 145.4, 137.7, 136.4, 135.3, 135.2, 129.8, 129.2, 129.0, 128.8, 128.8, 126.9, 126.8, 69.9, 65.3, 60.7, 56.0, 55.6, 39.1, 28.7, 13.9; HRMS (ESI):  $m/z$  calcd for  $\text{C}_{27}\text{H}_{29}\text{ClNO}_3\text{S}_2$   $[\text{M}+\text{H}]^+$ : 514.1272, found 514.1268.

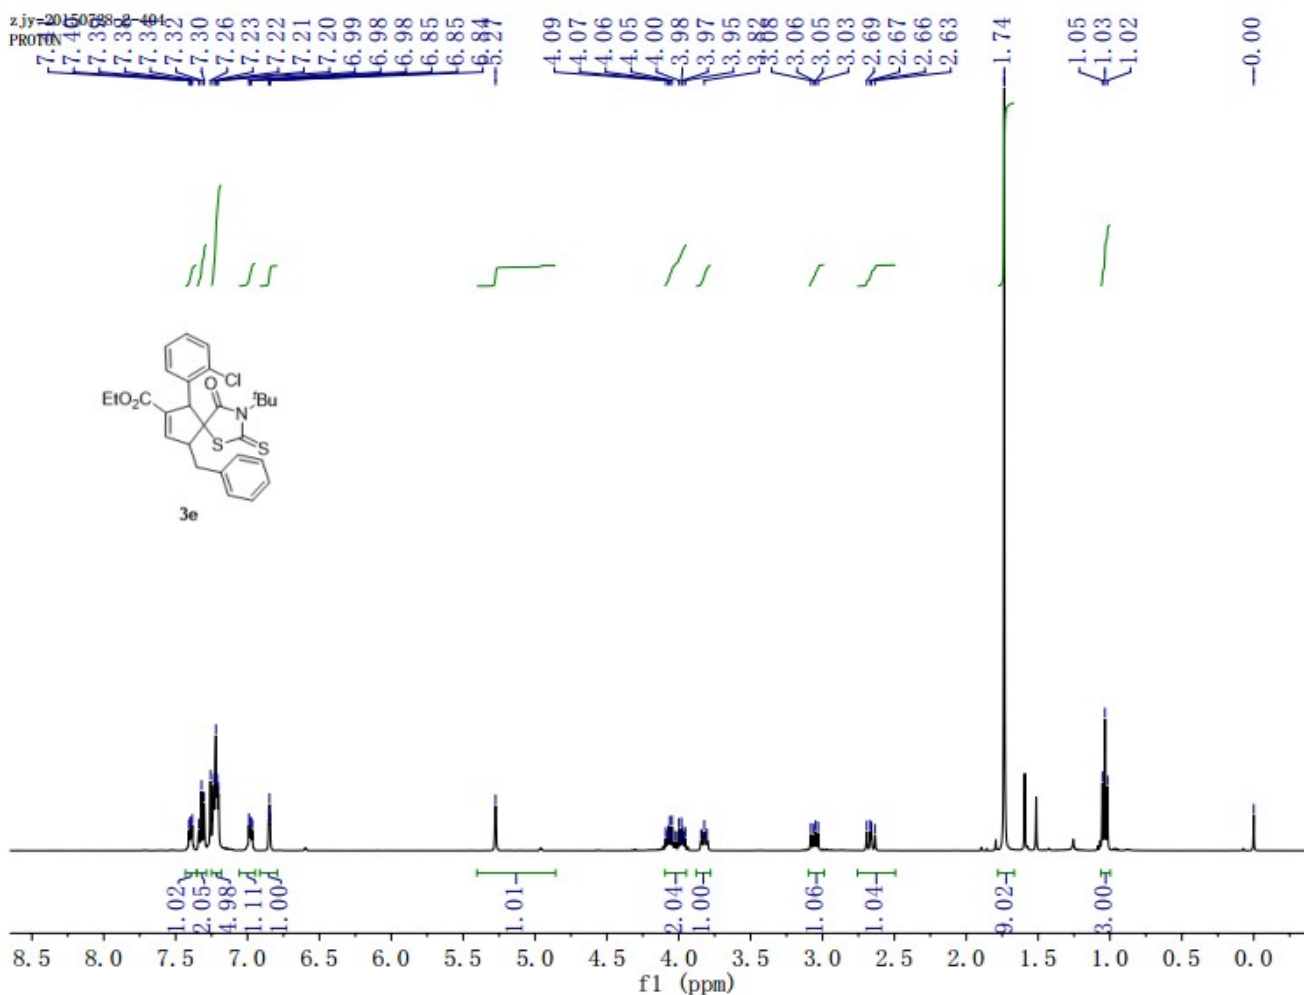

zjy-20150728-2-404  
C13CPD

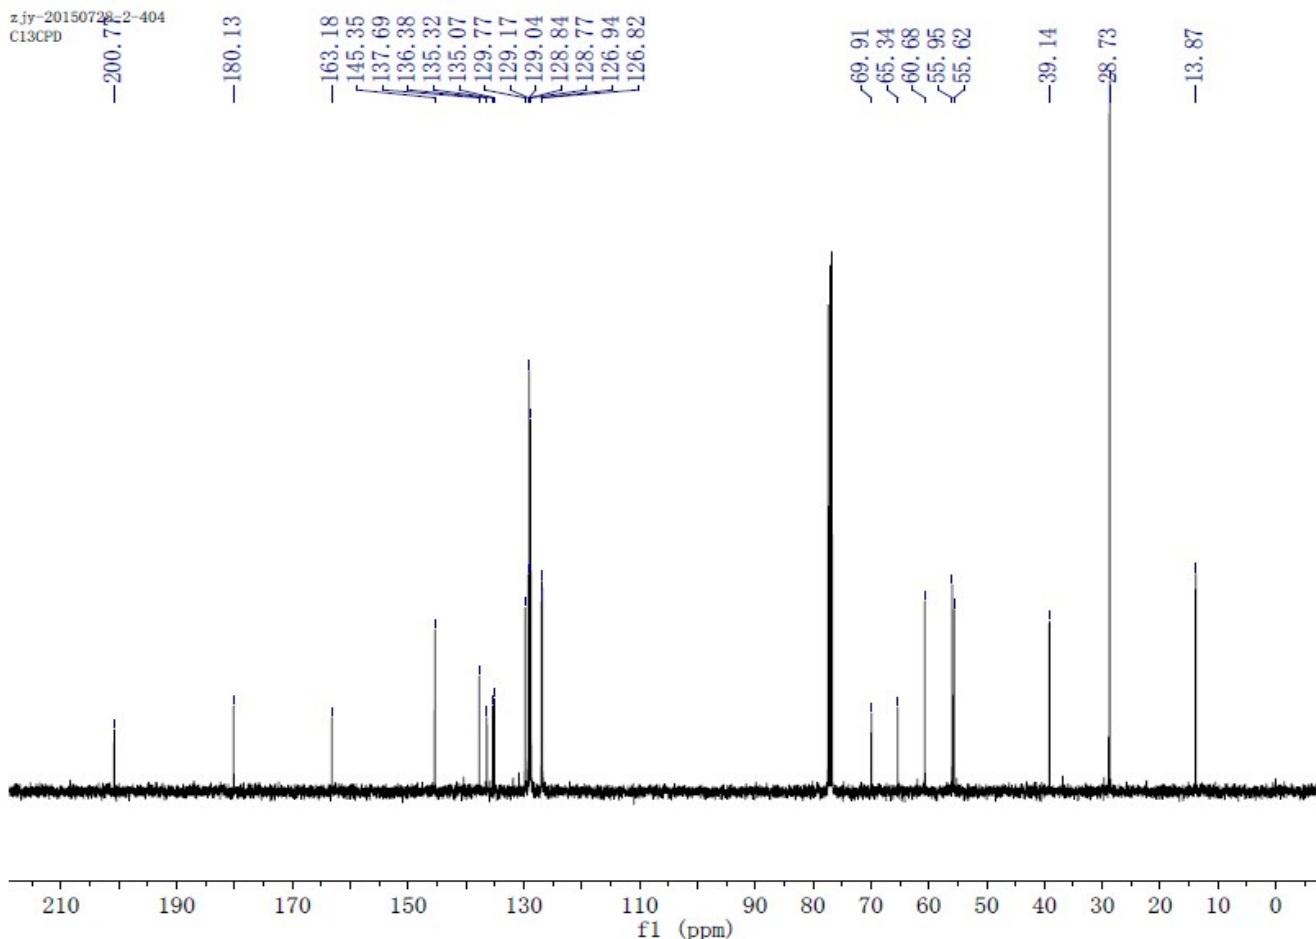

**Ethyl 9-benzyl-3-(tert-butyl)-6-(2,4-dichlorophenyl)-4-oxo-2-thioxo-1-thia-3-azaspiro[4.4]non-7-ene-7-carboxylate (3f):**

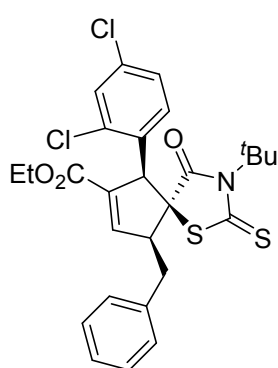

Yellow oil (54.3mg, 99% yield);  $^1\text{H}$  NMR (400 MHz,  $\text{CDCl}_3$ ):  $\delta$  7.42 (d,  $J$  = 2.1 Hz, 1H), 7.32 (t,  $J$  = 7.3 Hz, 2H), 7.21 (dd,  $J$  = 13.5, 7.1 Hz, 4H), 6.87 (t,  $J$  = 5.5 Hz, 2H), 5.21 (s, 1H), 4.12-3.97 (m, 2H), 3.84 (dd,  $J$  = 8.2, 7.3 Hz, 1H), 3.05 (dd,  $J$  = 13.6, 7.2 Hz, 1H), 2.66 (dd,  $J$  = 13.5, 9.6 Hz, 1H), 1.72 (s, 9H), 1.08 (t,  $J$  = 7.1 Hz, 3H);  $^{13}\text{C}$  NMR (101 MHz,  $\text{CDCl}_3$ ):  $\delta$  200.3, 180.0, 163.0, 145.8, 137.5, 135.8, 135.1, 134.6, 134.3, 129.6, 129.6, 129.1, 128.9, 127.3,

126.9, 69.8, 65.5, 60.9, 55.7, 55.6, 39.0, 28.7, 14.0. HRMS (ESI):  $m/z$  calcd for  $\text{C}_{27}\text{H}_{28}\text{Cl}_2\text{NO}_3\text{S}_2$   $[\text{M}+\text{H}]^+$ : 548.0882, found 548.0873.

zjy-20160517-3-402  
 PROTIN

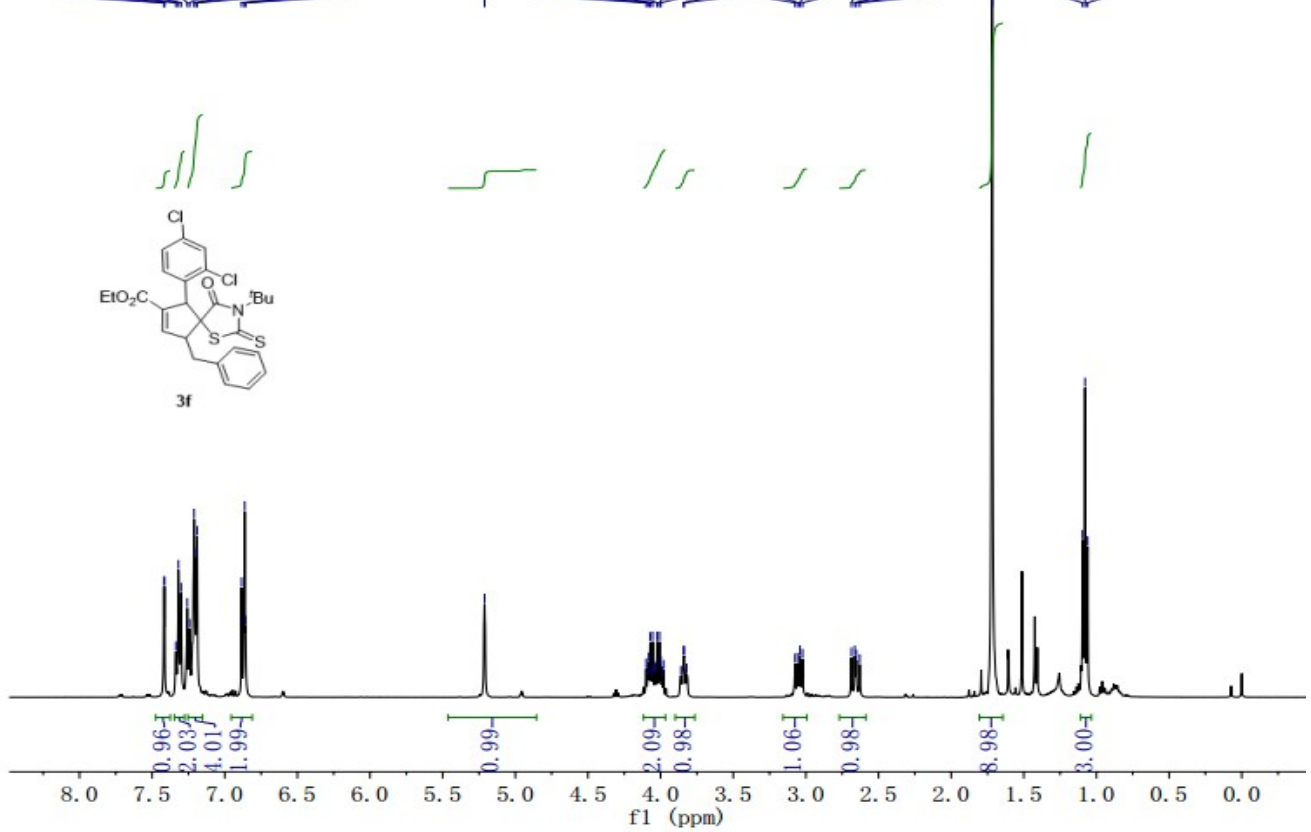

zjy-20160517-3-402  
 C13CPD

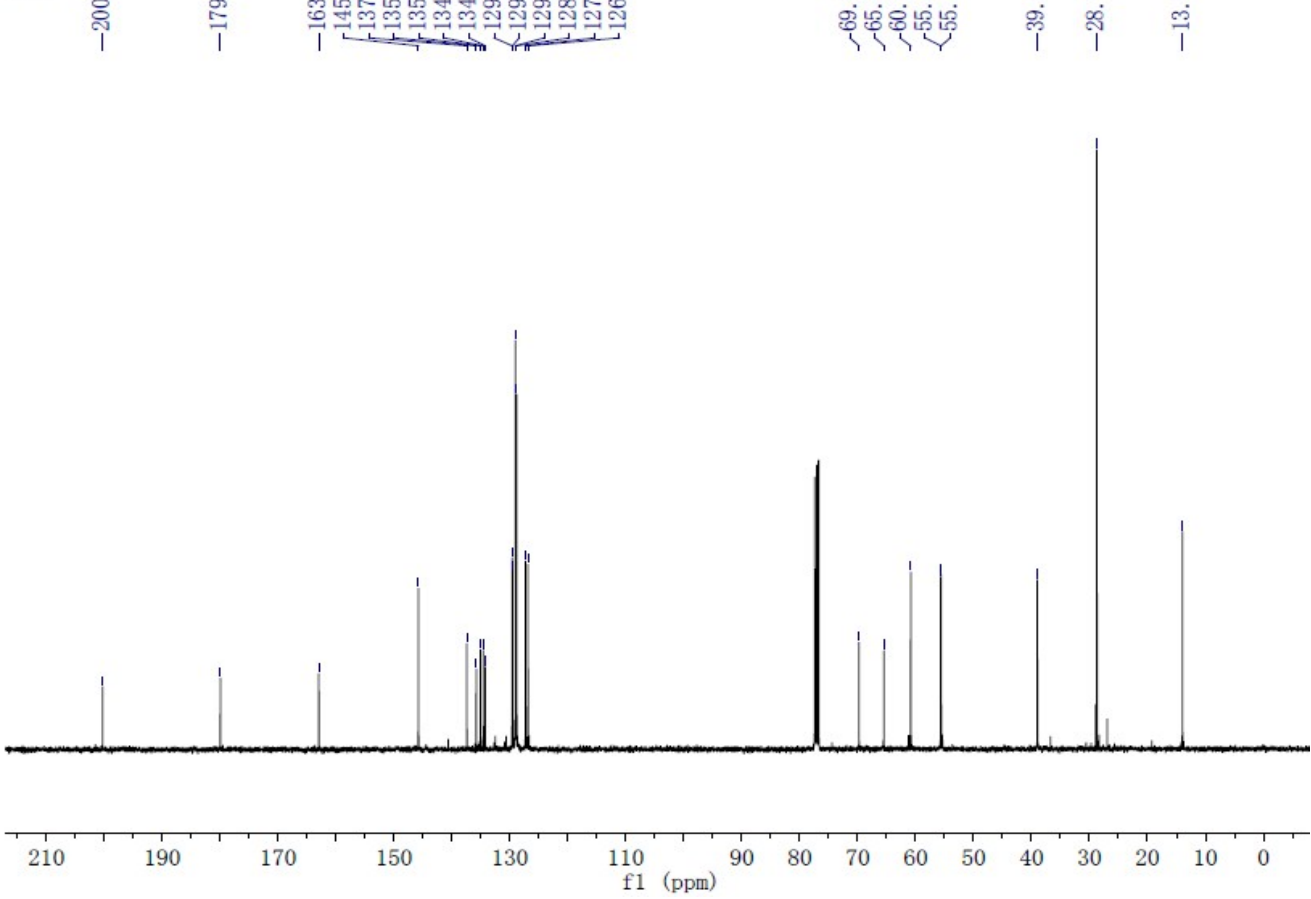

**Ethyl 9-benzyl-6-(4-bromophenyl)-3-(tert-butyl)-4-oxo-2-thioxo-1-thia-3-azaspiro[4.4]non-7-ene-7-carboxylate (3g):**

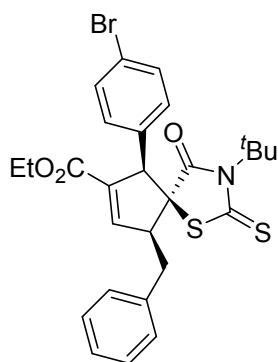

Yellow oil (53.6 mg, 96% yield);  $^1\text{H}$  NMR (400 MHz,  $\text{CDCl}_3$ ):  $\delta$  7.42 (d,  $J = 8.4$  Hz, 2H), 7.35-7.27 (m, 2H), 7.21 (t,  $J = 6.7$  Hz, 3H), 6.88 (d,  $J = 8.4$  Hz, 2H), 6.78 (t,  $J = 2.3$  Hz, 1H), 4.73 (s, 1H), 4.10-4.05 (m, 2H), 3.92-3.87 (ddd,  $J = 21.3, 12.2, 5.1$  Hz, 1H), 3.00-2.86 (ddd,  $J = 21.3, 4.9$  Hz, 2H), 1.59 (s, 9H), 1.08 (t,  $J = 7.1$  Hz, 3H);  $^{13}\text{C}$  NMR (101 MHz,  $\text{CDCl}_3$ ):  $\delta$  199.9, 178.8, 163.4, 144.9, 137.3, 136.0, 135.3, 131.5, 130.4, 129.2, 128.8, 126.8, 122.0, 72.9, 65.2,

60.8, 59.7, 54.6, 37.9, 28.8, 14.0; HRMS (ESI):  $m/z$  calcd for  $\text{C}_{27}\text{H}_{29}\text{BrNO}_3\text{S}_2$   $[\text{M}+\text{H}]^+$ : 558.0767, found 558.0757.

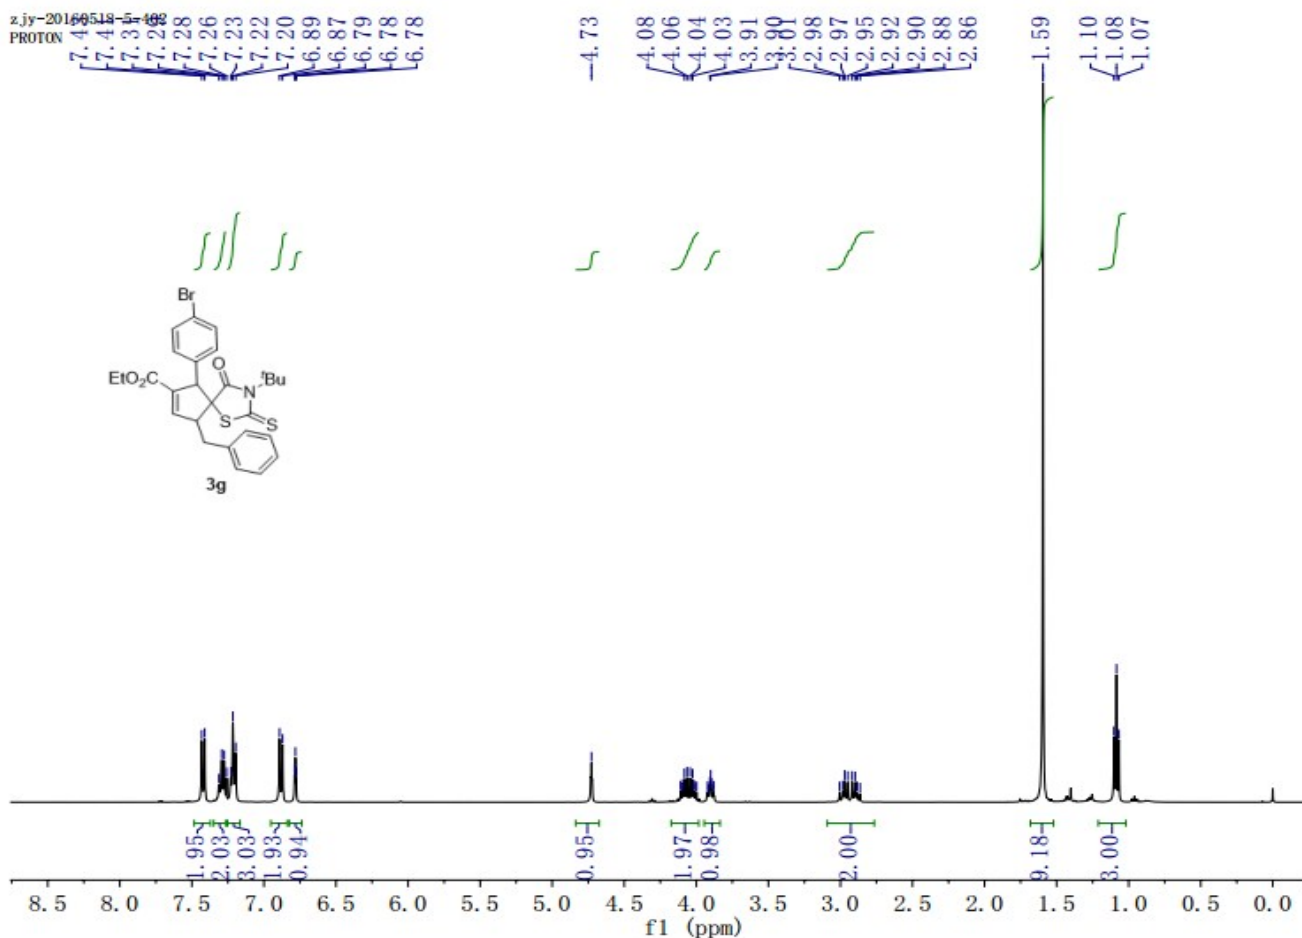

zjy-20160519-5-405  
C13CPD

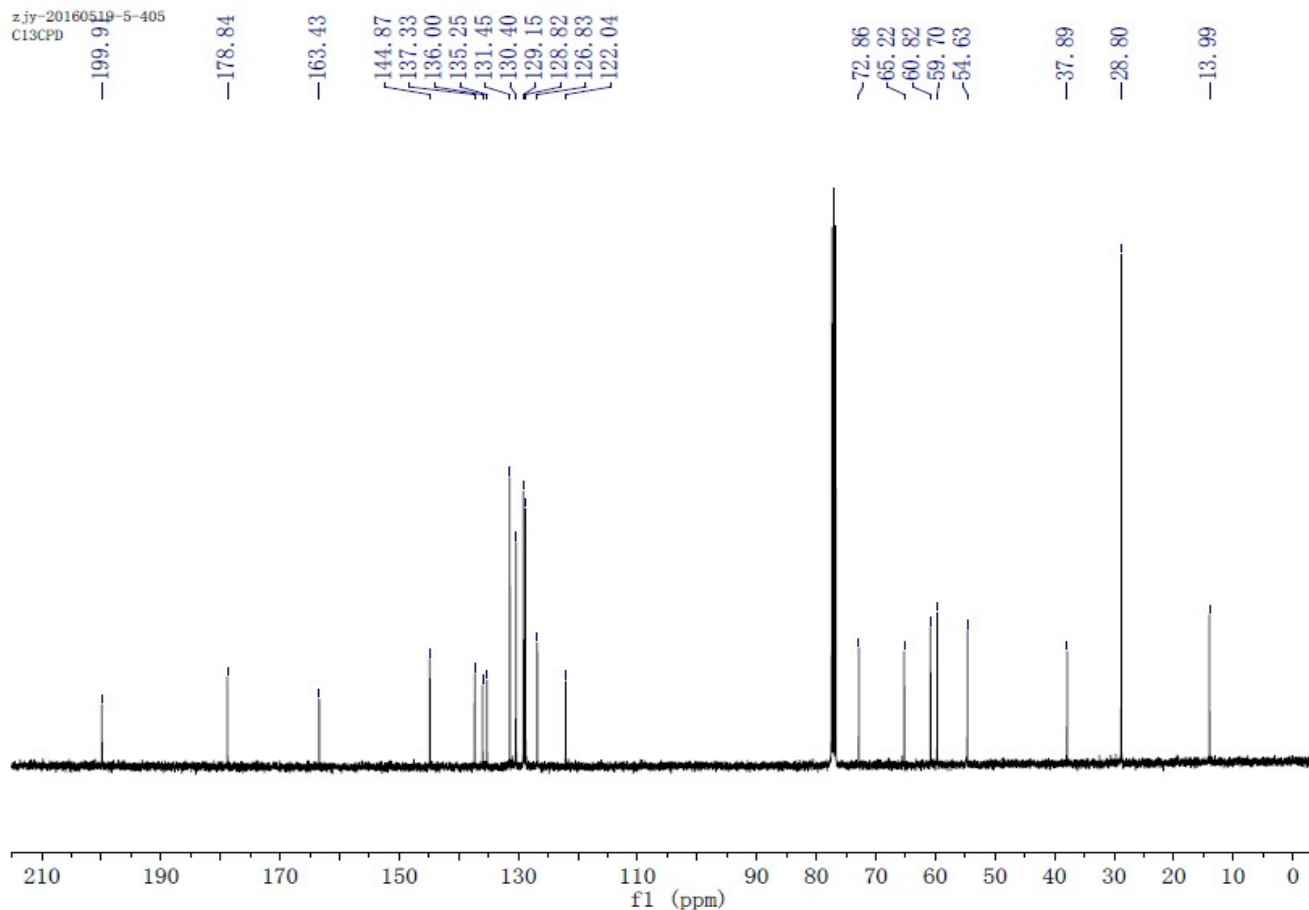

**Ethyl 9-benzyl-3-(tert-butyl)-6-(4-chlorophenyl)-4-oxo-2-thioxo-1-thia-3-azaspiro[4.4]non-7-ene-7-carboxylate (3h):**

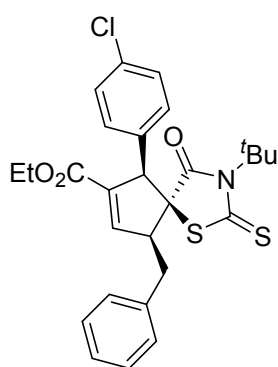

Yellow oil (48.8 mg, 95% yield);  $^1\text{H}$  NMR (400 MHz,  $\text{CDCl}_3$ ):  $\delta$  7.28 (dd,  $J$  = 10.2, 4.7 Hz, 3H), 7.25 (s, 1H), 7.20 (t,  $J$  = 6.4 Hz, 3H), 6.93 (d,  $J$  = 8.4 Hz, 2H), 6.77 (t,  $J$  = 2.3 Hz, 1H), 4.73 (t,  $J$  = 2.1 Hz, 1H), 4.13-3.95 (m, 2H), 3.90 (tt,  $J$  = 13.8, 2.0 Hz, 1H), 2.99-2.85 (ddd,  $J$  = 33.1, 13.8, 8.3 Hz, 2H), 1.58 (d,  $J$  = 7.6 Hz, 9H), 1.07 (t,  $J$  = 7.1 Hz, 3H);  $^{13}\text{C}$  NMR (101 MHz,  $\text{CDCl}_3$ ):  $\delta$  199.9, 178.9, 163.4, 144.8, 137.4, 135.5, 135.3, 133.9, 130.1, 129.1, 128.8, 128.5, 126.8, 73.0, 65.2, 60.8, 59.7, 54.6, 37.9, 28.8, 14.0; HRMS (ESI):  $m/z$  calcd for  $\text{C}_{27}\text{H}_{29}\text{ClNO}_3\text{S}_2$   $[\text{M}+\text{H}]^+$ : 514.1272, found 514.1266.

z.jy-20160603-5-403

PR030

7.30  
7.27  
7.27  
7.25  
7.22  
7.21  
7.19  
6.94  
6.92  
6.78  
6.77  
6.76

-4.73  
-4.07  
-4.06  
-4.03  
-4.01  
-3.90  
-3.90  
-3.88  
-2.98  
-2.96  
-2.94  
-2.91  
-2.89  
-2.88  
-2.86

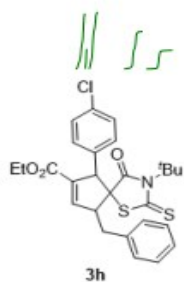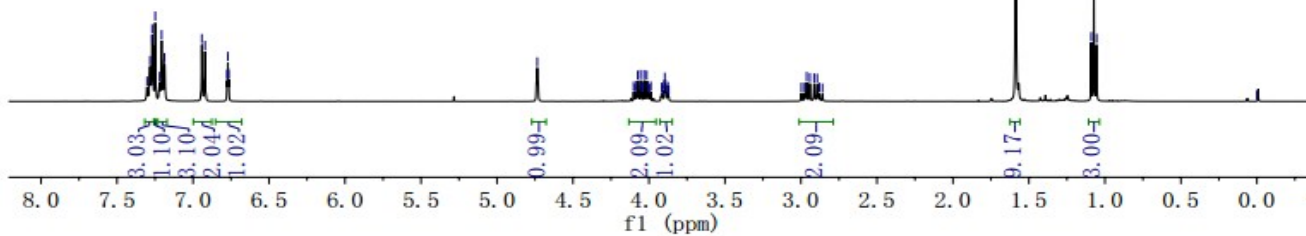

z.jy-20160603-6-404

C13CPD

-199.93  
-178.85  
-163.43  
144.78  
137.36  
135.48  
135.34  
133.86  
130.08  
129.14  
128.81  
128.49  
126.82  
-73.01  
-65.22  
-60.78  
-59.68  
-54.59  
-37.89  
-28.80  
-13.97

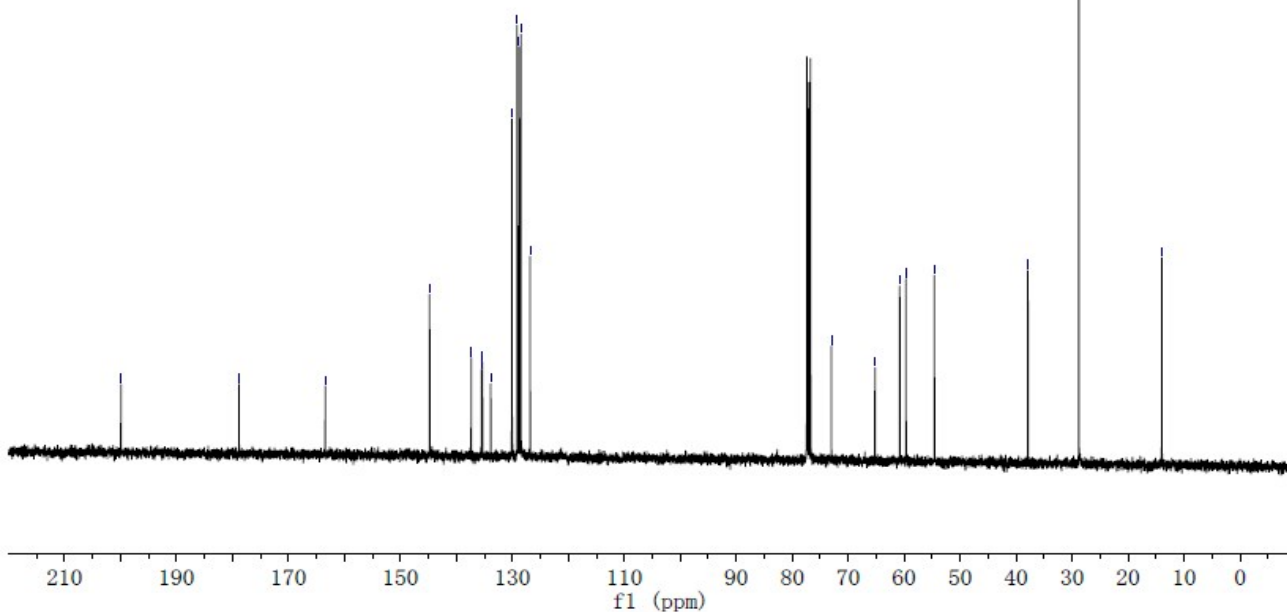

**Ethyl 9-benzyl-3-(tert-butyl)-6-(4-fluorophenyl)-4-oxo-2-thioxo-1-thia-3-azaspiro[4.4]non-7-ene-7-carboxylate (3i):**

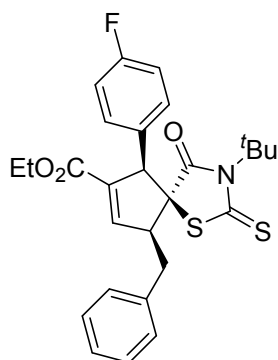

Yellow oil (46.3 mg, 93% yield);  $^1\text{H}$  NMR (400 MHz,  $\text{CDCl}_3$ ):  $\delta$  7.55 (dd,  $J = 12.8, 6.1$  Hz, 2H), 7.48 (d,  $J = 6.8$  Hz, 3H), 7.25 (d,  $J = 6.6$  Hz, 4H), 7.04 (d,  $J = 1.4$  Hz, 1H), 5.02 (s, 1H), 4.41-4.24 (m, 2H), 4.18 (t,  $J = 7.7$  Hz, 1H), 3.31-3.06 (m, 2H), 1.86 (s, 9H), 1.34 (t,  $J = 7.1$  Hz, 3H);  $^{13}\text{C}$  NMR (101 MHz,  $\text{CDCl}_3$ ):  $\delta$  200.1, 178.9, 163.5, 144.6, 137.4, 135.5, 130.4, 130.4, 129.2, 128.8, 126.8, 115.3, 115.1, 73.3, 65.2, 60.7, 59.7, 54.4, 37.9, 28.8, 14.0;  $^{19}\text{F}$  NMR (376

MHz,  $\text{CDCl}_3$ ):  $\delta$  -113.87; HRMS (ESI):  $m/z$  calcd for  $\text{C}_{27}\text{H}_{29}\text{FNO}_3\text{S}_2$   $[\text{M}+\text{H}]^+$ : 498.1567, found 498.1565.

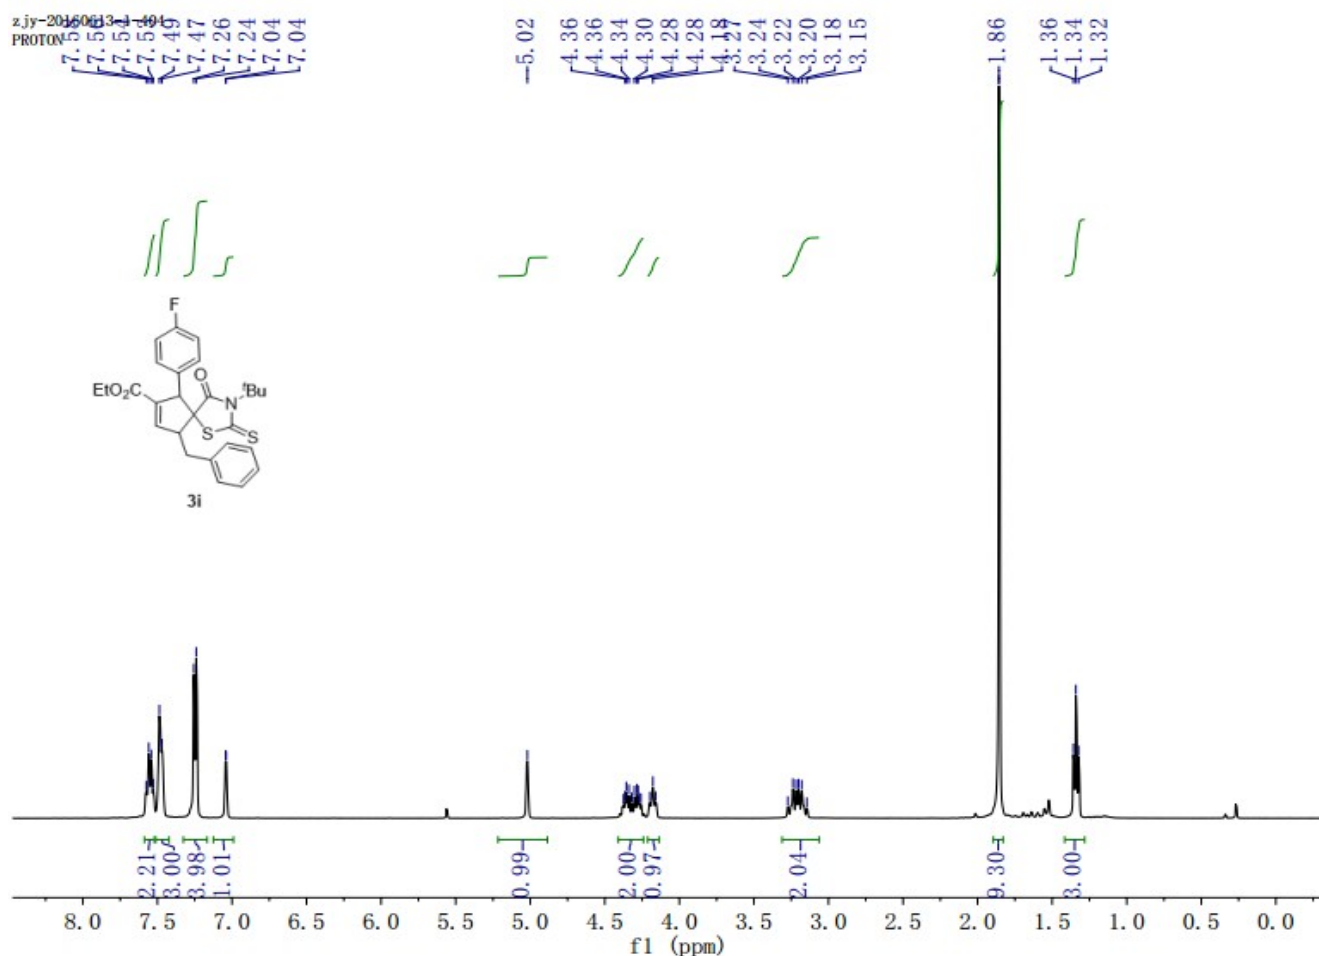

z.jy-20160613-404  
C13CPD

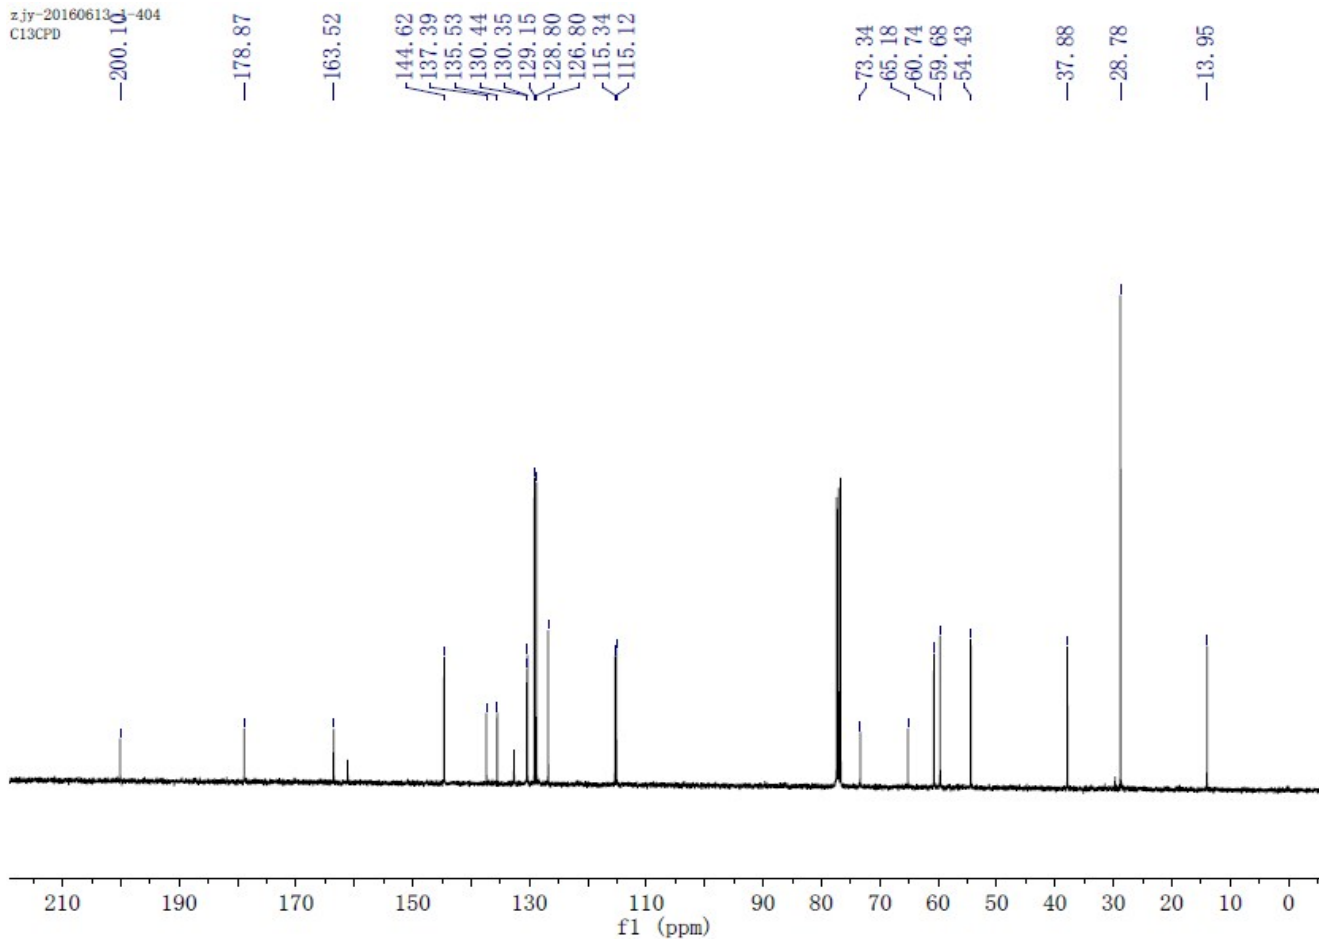

z.jy-20160613-5-403  
F19

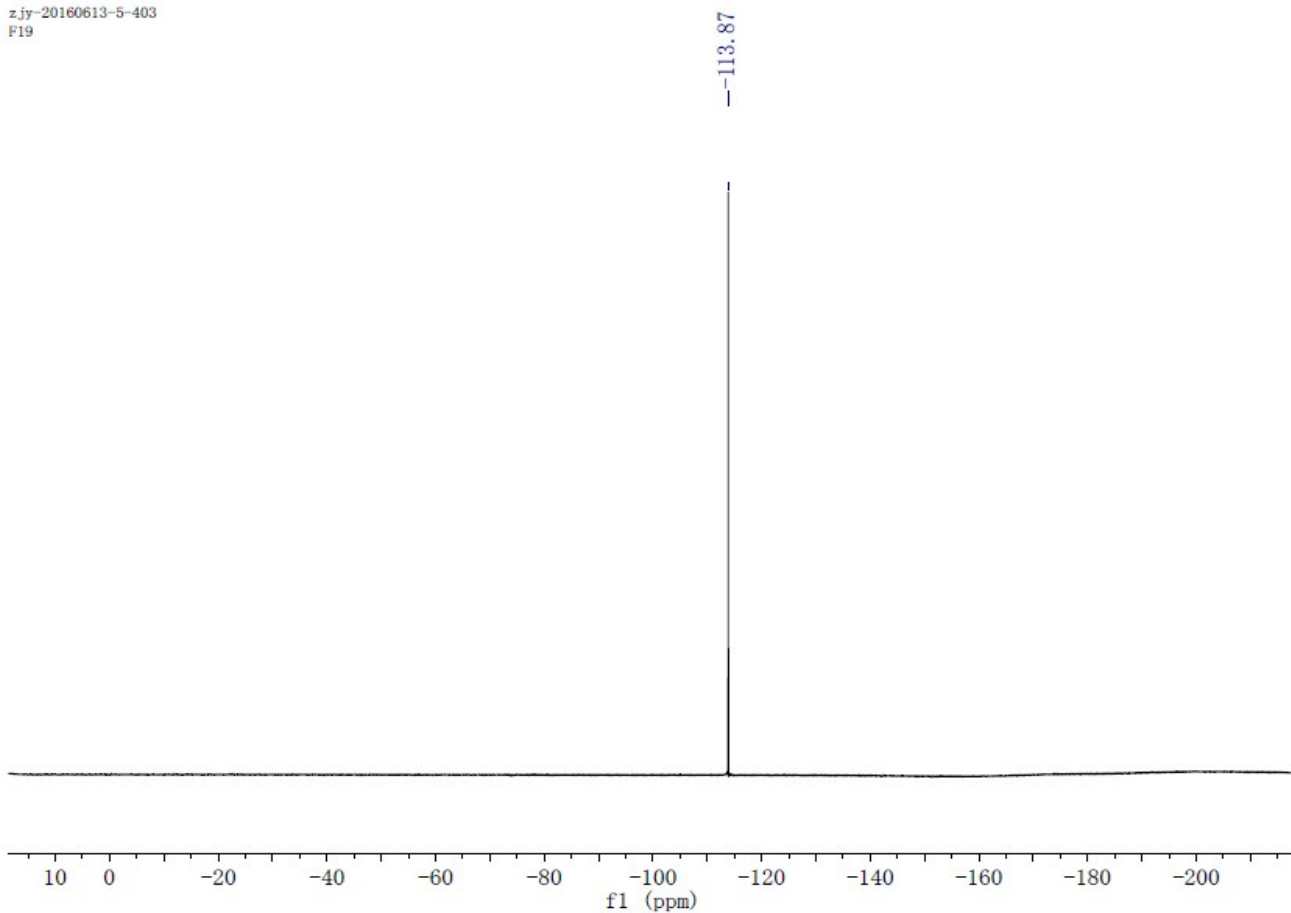



**Ethyl 9-benzyl-3-(tert-butyl)-6-(4-methoxyphenyl)-4-oxo-2-thioxo-1-thia-3-azaspiro[4.4]non-7-ene-7-carboxylate (3j):**

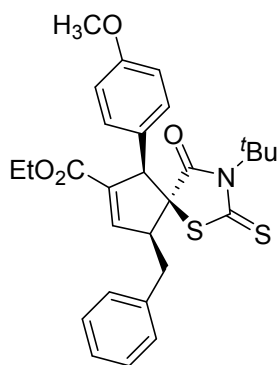

Yellow oil (40.3 mg, 79% yield); <sup>1</sup>H NMR (400 MHz, CDCl<sub>3</sub>): δ 7.28 (d, *J* = 6.6 Hz, 2H), 7.22 (s, 3H), 6.93 (d, *J* = 7.3 Hz, 2H), 6.82 (d, *J* = 7.8 Hz, 2H), 6.74 (s, 1H), 4.70 (s, 1H), 4.12-3.99 (m, 2H), 3.86 (s, 1H), 3.78 (s, 3H), 2.93 (dt, *J* = 13.4 Hz, 2H), 1.62 (s, 9H), 1.08 (t, *J* = 6.7 Hz, 3H); <sup>13</sup>C NMR (101 MHz, CDCl<sub>3</sub>): δ 199.5, 178.1, 162.7, 158.2, 143.0, 136.6, 134.9, 128.8, 128.1, 128.0, 127.7, 125.7, 112.6, 72.3, 64.0, 59.6, 58.5, 54.2, 53.3, 37.1, 27.8, 13.0; HRMS

(ESI): *m/z* calcd for C<sub>28</sub>H<sub>32</sub>NO<sub>4</sub>S<sub>2</sub> [M+H]<sup>+</sup>: 510.1767, found 510.1760.

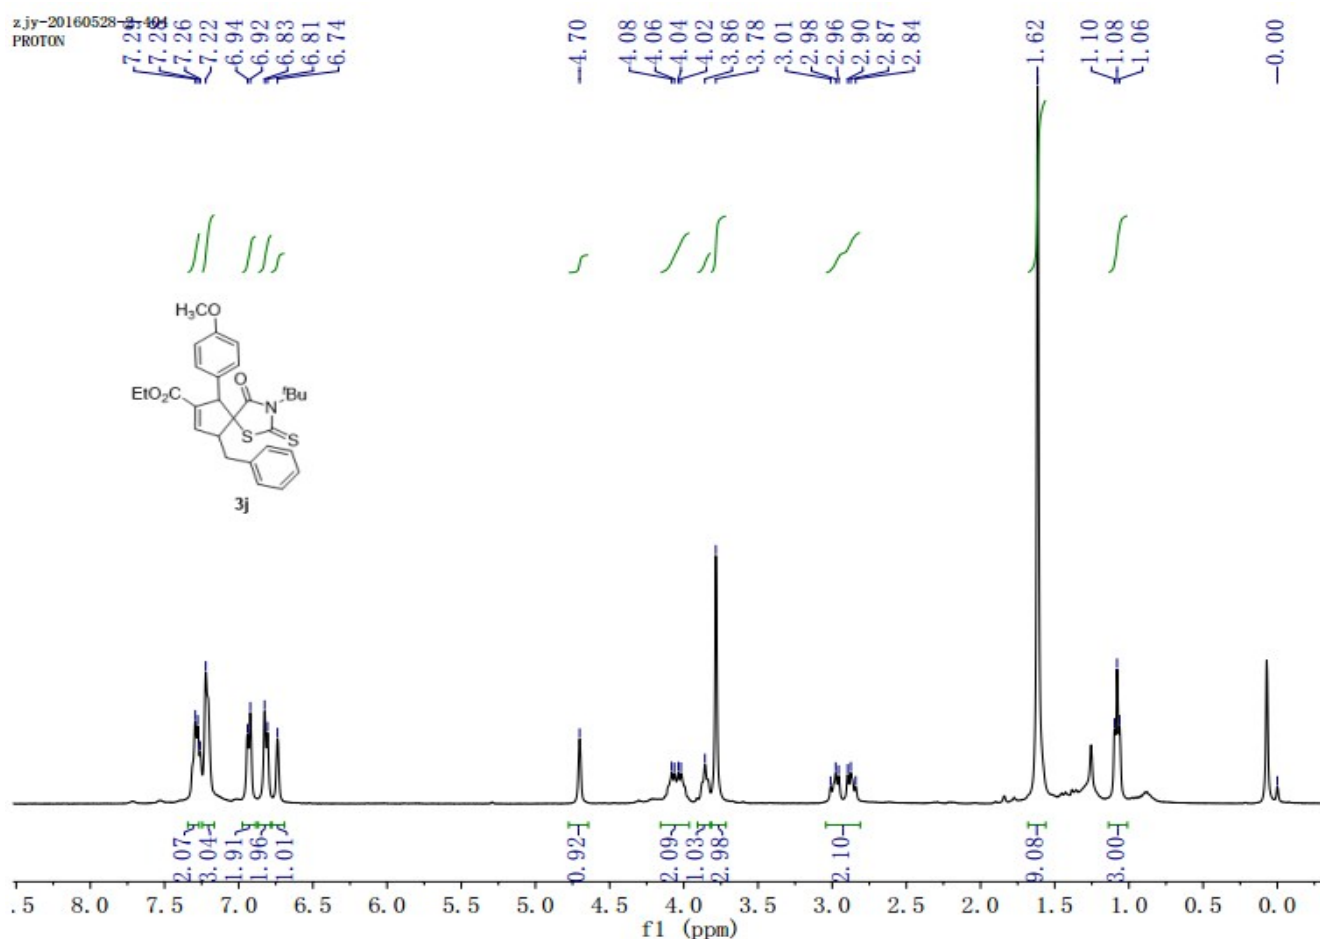

zjy-20160528-2-404  
C13CPD

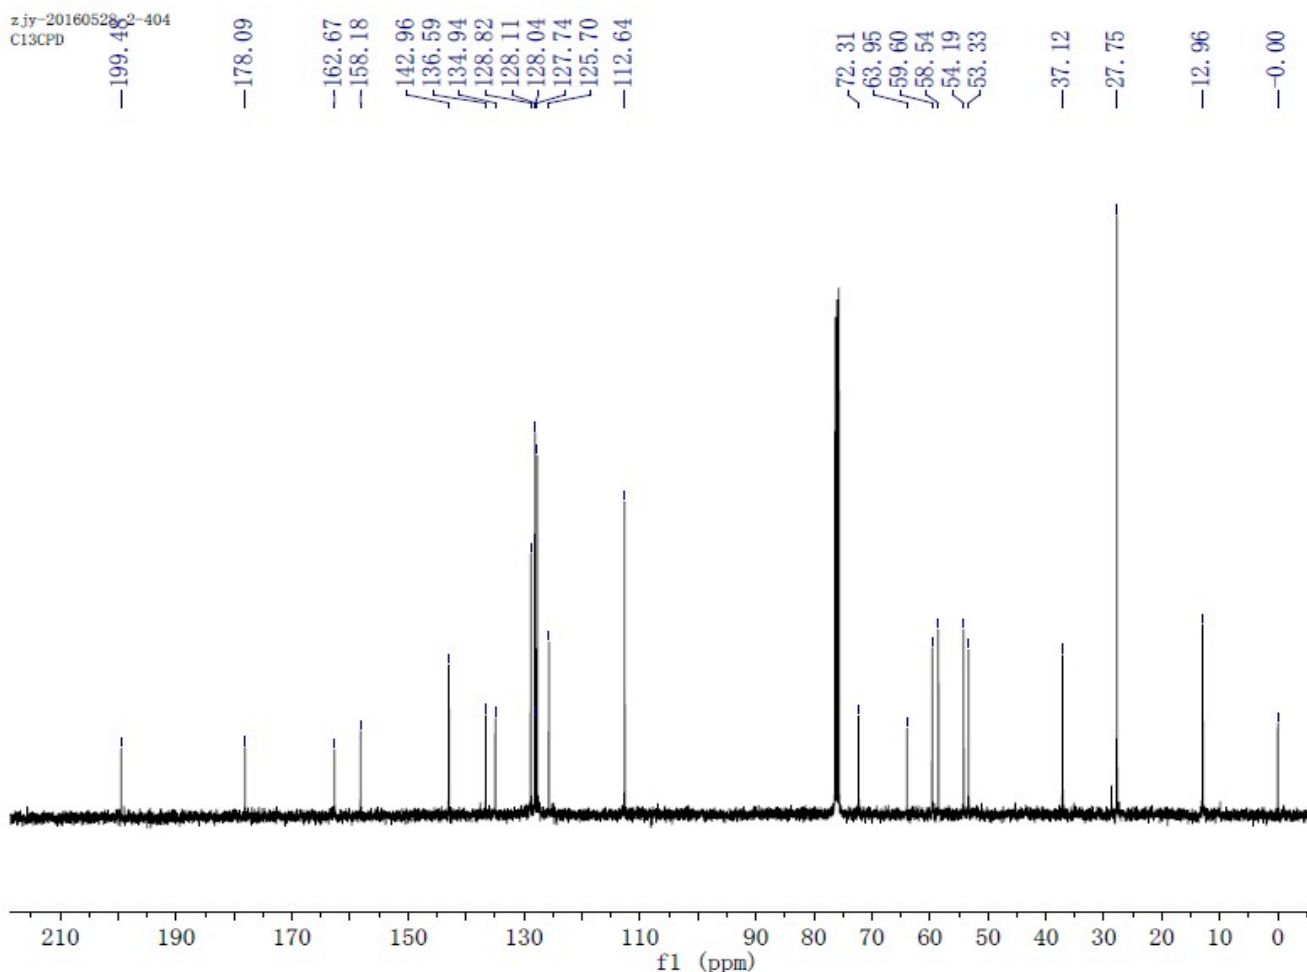

**Ethyl 9-benzyl-3-(tert-butyl)-6-(4-isopropylphenyl)-4-oxo-2-thioxo-1-thia-3-azaspiro[4.4]non-7-ene-7-carboxylate (3k):**

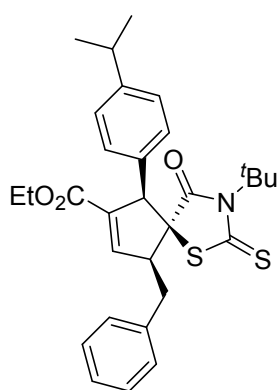

Yellow oil (45.4 mg, 87% yield);  $^1\text{H}$  NMR (400 MHz,  $\text{CDCl}_3$ ):  $\delta$  7.30 (t,  $J = 7.2$  Hz, 2H), 7.22 (d,  $J = 7.2$  Hz, 3H), 7.13 (d,  $J = 7.5$  Hz, 2H), 6.93 (d,  $J = 7.5$  Hz, 2H), 6.75 (s, 1H), 4.71 (s, 1H), 4.16-3.94 (m, 2H), 3.84 (t,  $J = 8.0$  Hz, 1H), 2.99 (dd,  $J = 8.0$  Hz, 1H), 2.93-2.79 (m, 2H), 1.62 (s, 9H), 1.22 (s, 3H), 1.20 (s, 3H), 1.05 (t,  $J = 7.1$  Hz, 3H);  $^{13}\text{C}$  NMR (101 MHz,  $\text{CDCl}_3$ ):  $\delta$  200.6, 179.0, 163.7, 148.6, 144.0, 137.7, 136.0, 134.1, 129.1, 128.7, 128.7, 126.7, 126.3, 73.1,

64.9, 60.6, 59.8, 54.4, 38.2, 33.7, 28.7, 23.9, 13.9; HRMS (ESI):  $m/z$  calcd for  $\text{C}_{30}\text{H}_{36}\text{NO}_3\text{S}_2$   $[\text{M}+\text{H}]^+$ : 522.2131, found 522.2130.

zjy-2015-919-4-402

7.28  
7.26  
7.23  
7.21  
7.14  
7.12  
6.94  
6.75

4.71  
4.10  
4.08  
4.01  
4.00  
3.99  
3.86  
3.84  
3.82  
3.81  
2.99  
2.98  
2.96  
2.90  
2.88  
2.87  
2.85  
2.84

1.62  
1.22  
1.20  
1.06  
1.05  
1.03

0.00

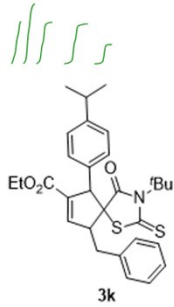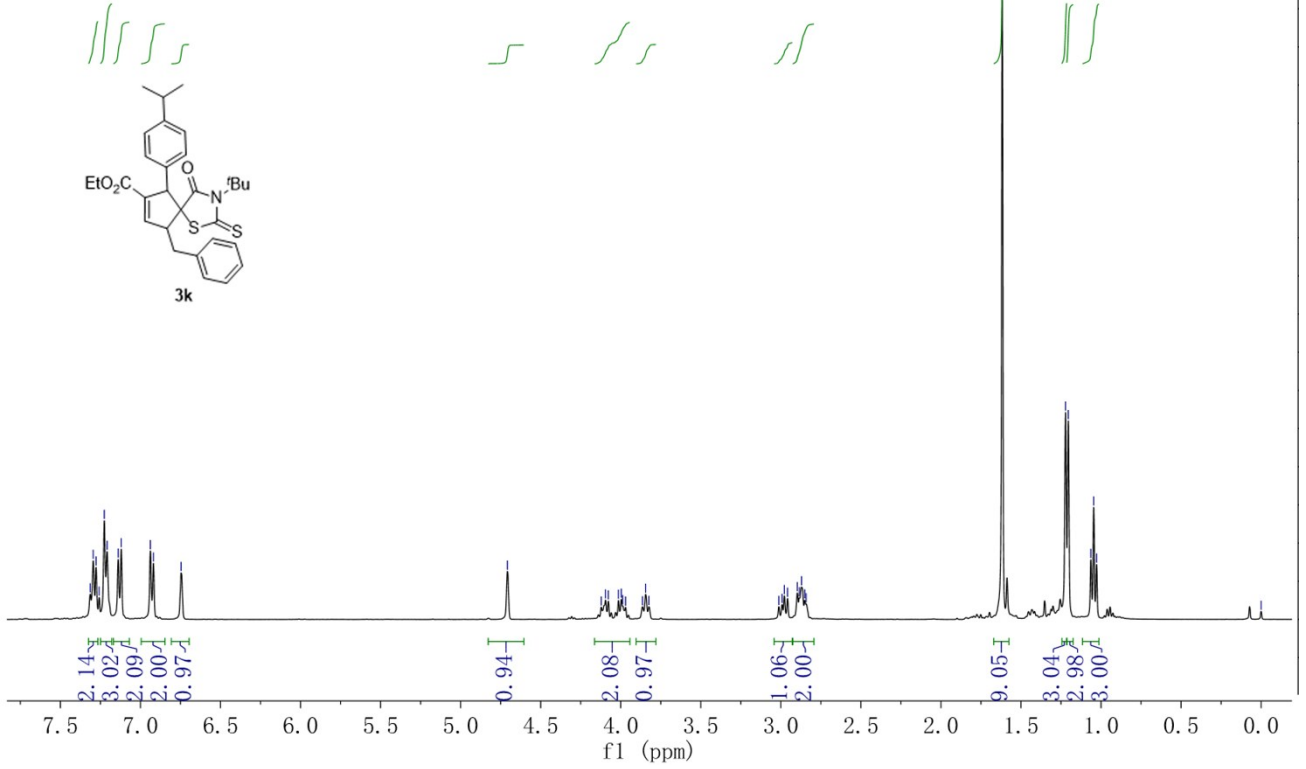

zjy-20150919-2-402  
C13CPD

200.51  
179.03

163.68  
148.55  
143.97  
137.66  
136.03  
134.11  
129.12  
128.74  
128.69  
126.70  
126.27

73.09  
64.90  
60.57  
59.79  
54.37  
38.17  
33.73  
28.71  
23.94  
23.88  
13.88

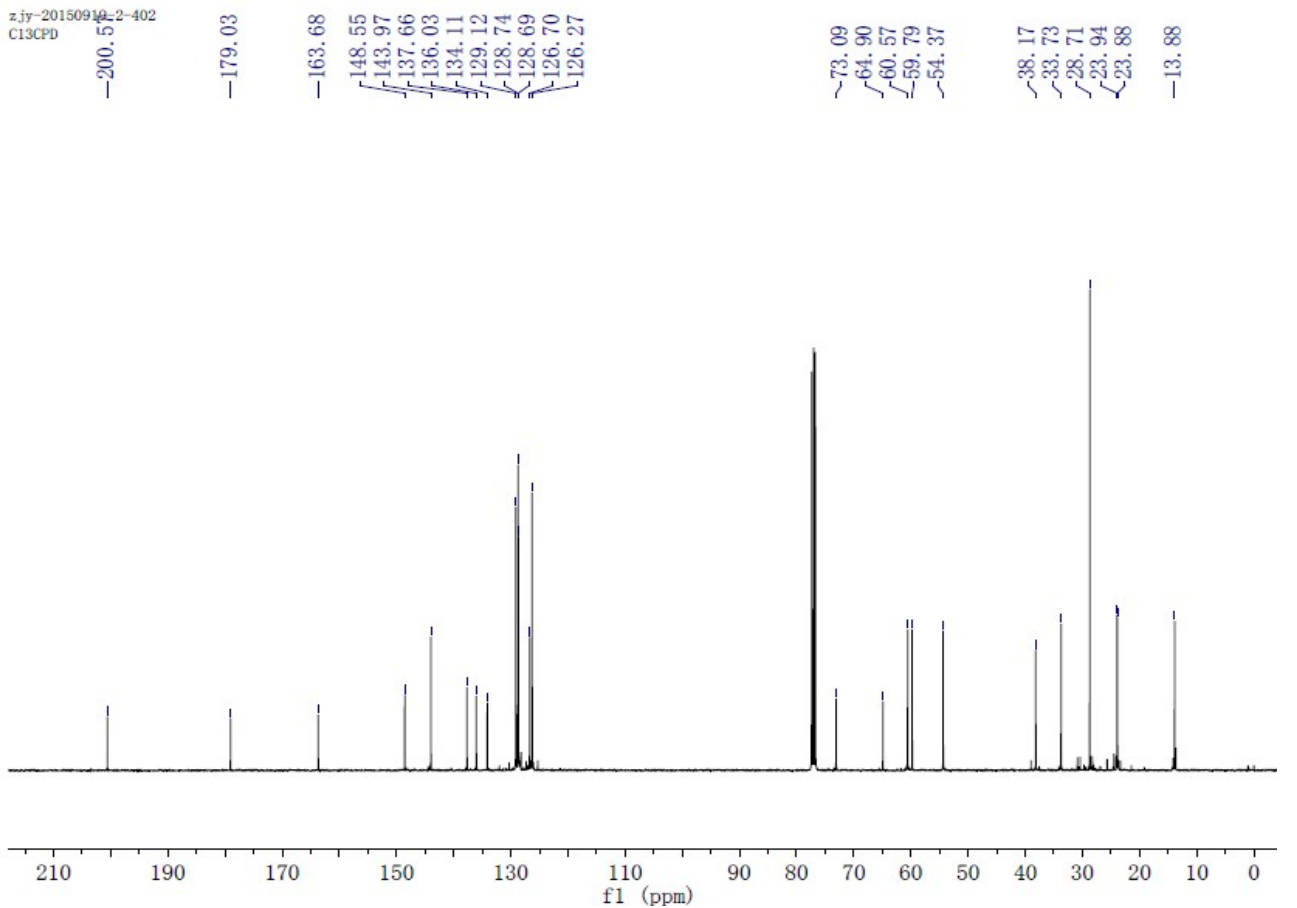

**Ethyl 9-benzyl-3-(tert-butyl)-4-oxo-2-thioxo-6-(m-tolyl)-1-thia-3-azaspiro[4.4]non-7-ene-7-carboxylate (3I):**

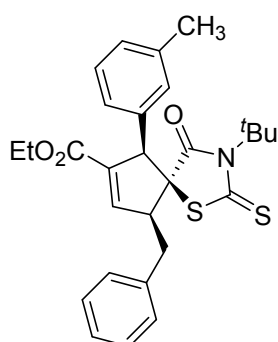

Yellow oil (41.9 mg, 85% yield);  $^1\text{H}$  NMR (400 MHz,  $\text{CDCl}_3$ ):  $\delta$  7.29 (dd,  $J = 9.5, 5.5$  Hz, 2H), 7.24-7.14 (m, 4H), 7.06 (d,  $J = 7.5$  Hz, 1H), 6.79 (d,  $J = 6.3$  Hz, 2H), 6.74 (t,  $J = 2.2$  Hz, 1H), 4.73 (d,  $J = 1.9$  Hz, 1H), 4.17-3.97 (m, 2H), 3.94-3.85 (m, 1H), 2.94 (dd,  $J = 13.8, 8.3$  Hz, 2H), 2.30 (s, 3H), 1.61 (s, 9H), 1.06 (t,  $J = 7.1$  Hz, 3H);  $^{13}\text{C}$  NMR (101 MHz,  $\text{CDCl}_3$ ):  $\delta$  200.7, 179.1, 163.8,

144.1, 137.7, 137.6, 136.8, 135.9, 129.4, 129.2, 128.8, 128.2, 126.7, 125.8, 73.1, 65.0, 60.7, 60.3, 54.5, 38.0, 28.8, 21.5, 14.0; HRMS (ESI):  $m/z$  calcd for  $\text{C}_{28}\text{H}_{32}\text{NO}_3\text{S}_2$   $[\text{M}+\text{H}]^+$ : 494.1818, found 494.1823.

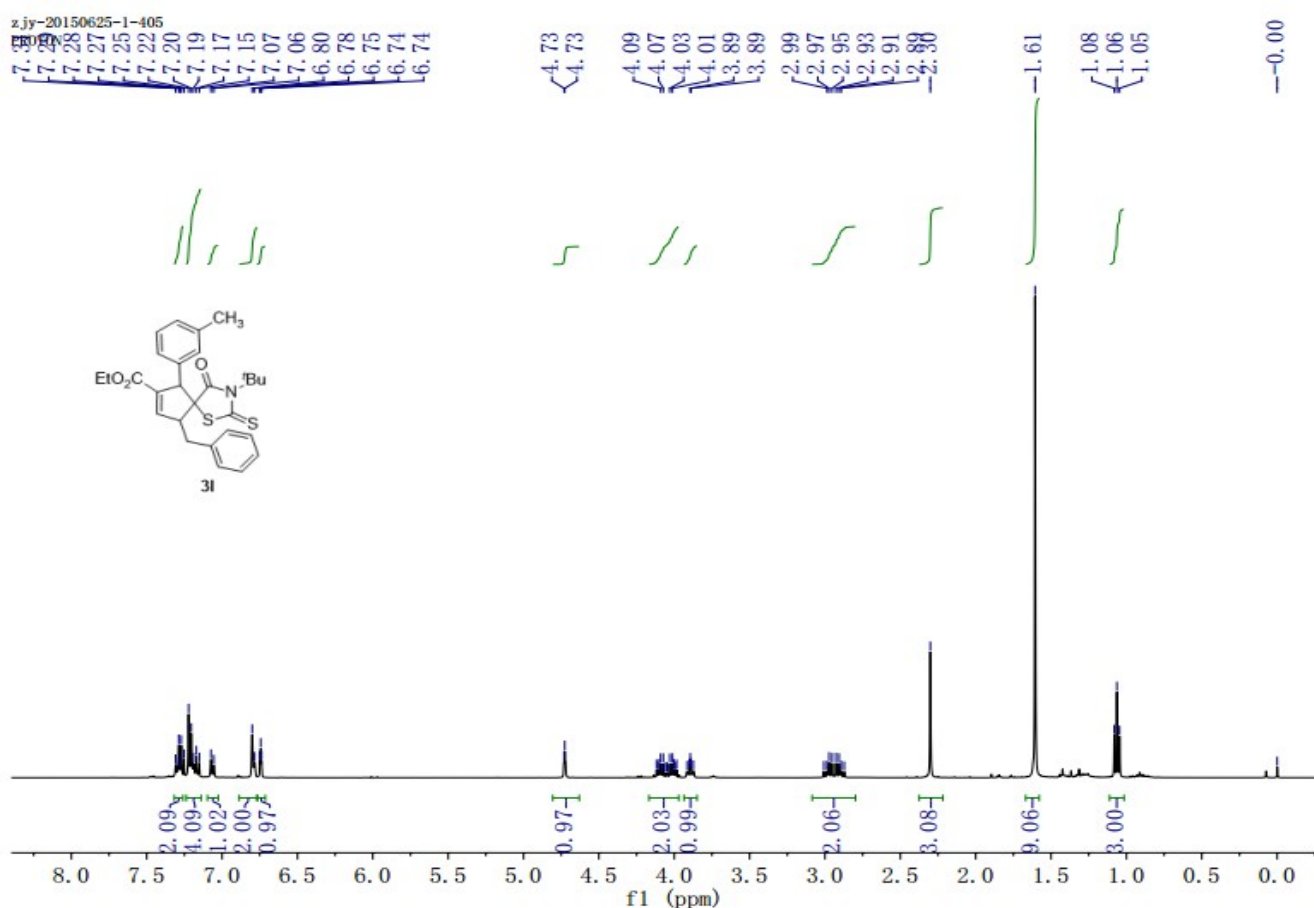

zjy-20150625-1305  
C13CPD

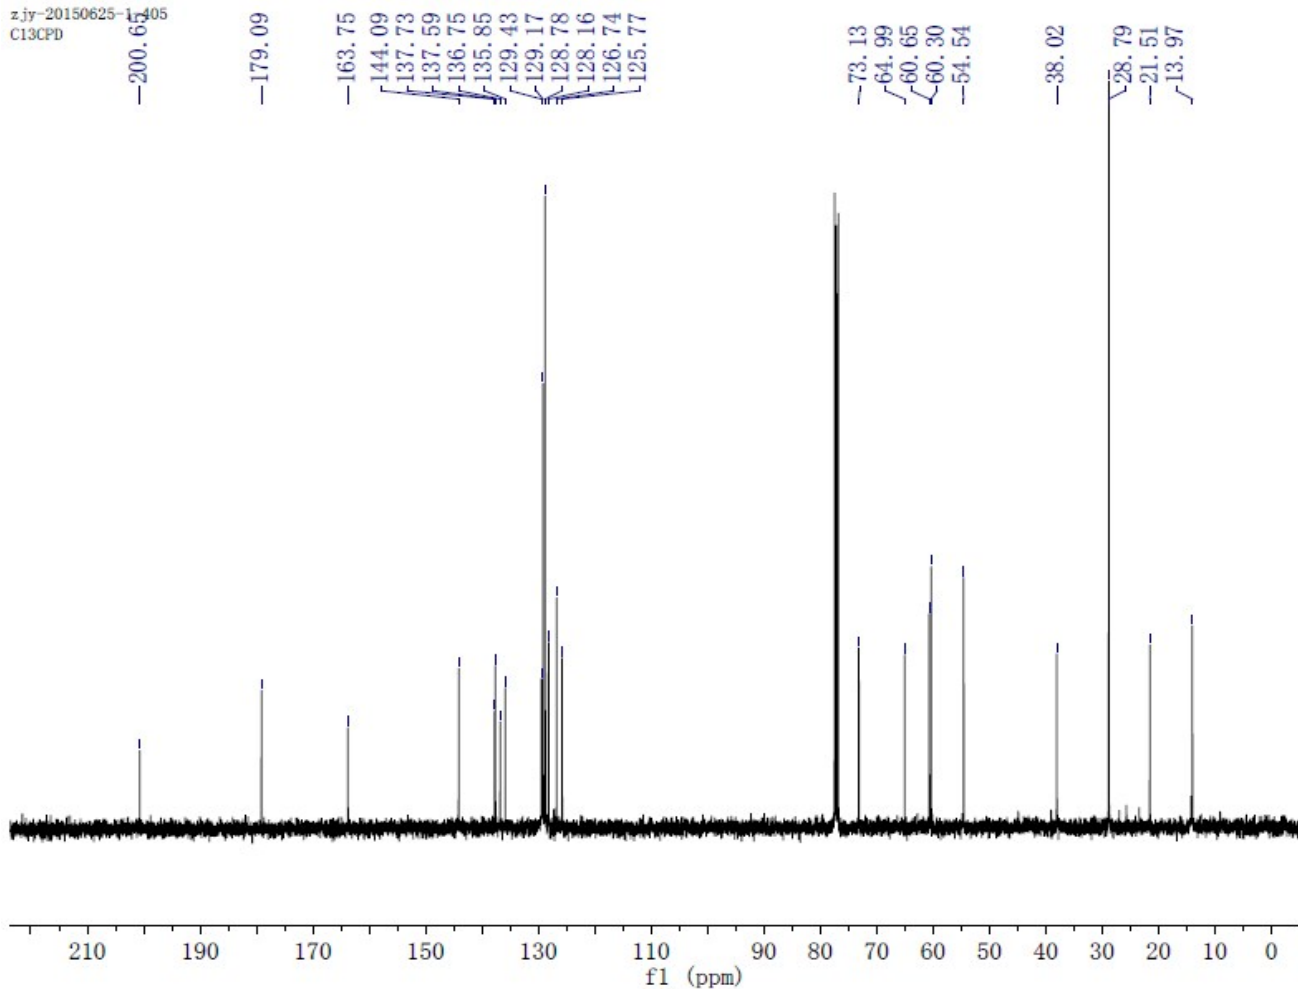

**Ethyl 9-benzyl-3-(tert-butyl)-4-oxo-2-thioxo-6-(p-tolyl)-1-thia-3-azaspiro[4.4]non-7-ene-7-carboxylate (3m):**

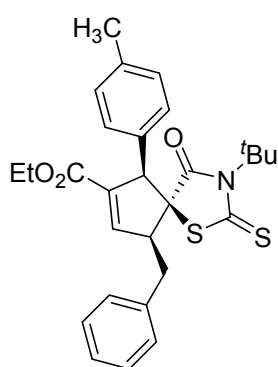

Yellow oil (42.9 mg, 87% yield);  $^1\text{H}$  NMR (400 MHz,  $\text{CDCl}_3$ ):  $\delta$  7.28 (d,  $J = 7.1$  Hz, 2H), 7.22 (d,  $J = 6.1$  Hz, 3H), 7.09 (d,  $J = 7.7$  Hz, 2H), 6.89 (d,  $J = 7.9$  Hz, 2H), 6.74 (d,  $J = 2.1$  Hz, 1H), 4.71 (s, 1H), 4.15-3.97 (m, 2H), 3.86 (dd,  $J = 11.4, 5.0$  Hz, 1H), 2.98 (dd,  $J = 13.6, 8.2$  Hz, 1H), 2.87 (dd,  $J = 13.7, 8.5$  Hz, 1H), 2.31 (s, 3H), 1.62 (s, 9H), 1.07 (t,  $J = 7.1$  Hz, 3H);  $^{13}\text{C}$  NMR (101 MHz,  $\text{CDCl}_3$ ):  $\delta$  200.6, 179.2, 163.7, 144.0, 137.7, 135.9, 134.0, 129.2, 129.1, 128.8,

128.6, 126.7, 73.0, 65.0, 60.7, 59.9, 54.5, 38.2, 28.8, 21.2, 14.0; HRMS (ESI):  $m/z$  calcd for  $\text{C}_{28}\text{H}_{32}\text{NO}_3\text{S}_2$   $[\text{M}+\text{H}]^+$ : 494.1818, found 494.1820.

zjy-20160517-1-402  
PROTON

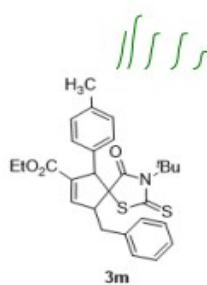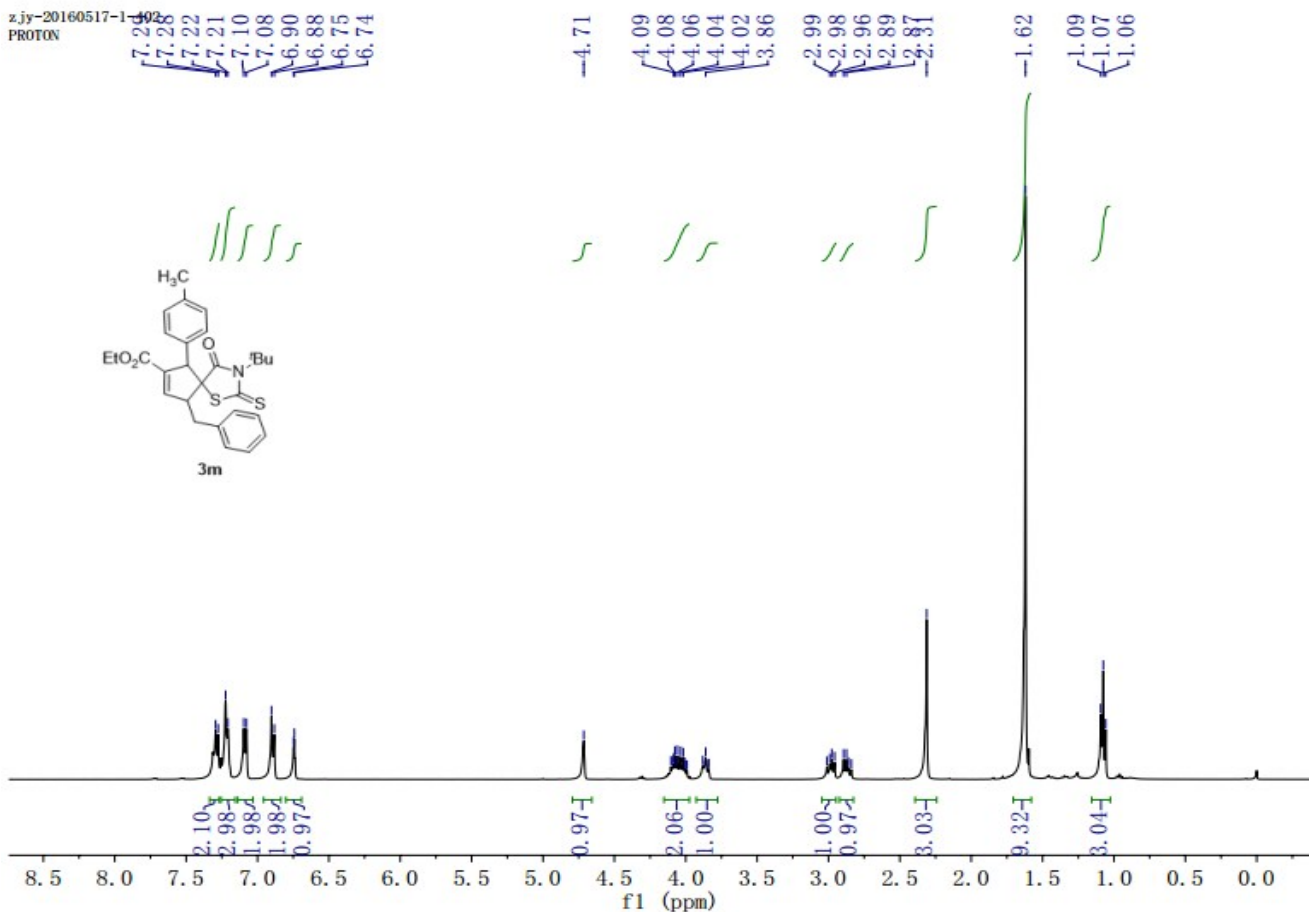

zjy-20160517-1-402  
C13CPD

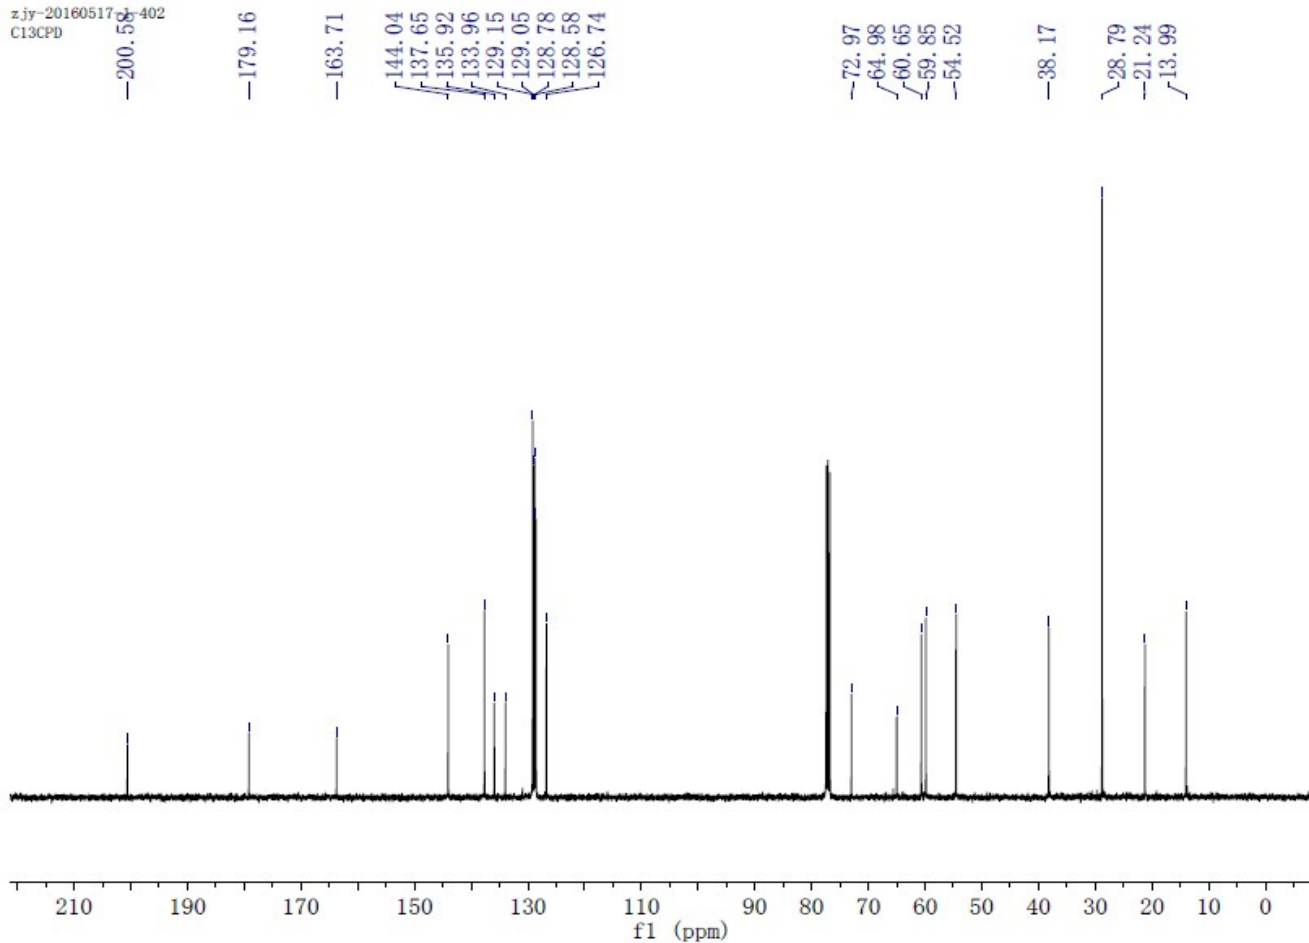

**Ethyl 9-benzyl-3-(tert-butyl)-6-(4-(dimethylamino)phenyl)-4-oxo-2-thioxo-1-thia-3-azaspiro-[4.4]-non-7-ene-7-carboxylate (3n):**

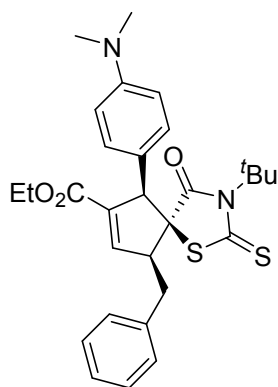

Yellow oil (42.9 mg, 82% yield);  $^1\text{H}$  NMR (400 MHz,  $\text{CDCl}_3$ ):  $\delta$  7.33-7.27 (m, 2H), 7.25-7.19 (m, 3H), 6.88 (d,  $J = 8.6$  Hz, 2H), 6.71 (t,  $J = 2.2$  Hz, 1H), 6.62 (d,  $J = 8.6$  Hz, 2H), 4.63 (s, 1H), 4.12-3.97 (m, 2H), 3.78 (t,  $J = 8.3$  Hz, 1H), 2.99 (dd,  $J = 13.6, 7.7$  Hz, 1H), 2.92 (d,  $J = 10.1$  Hz, 6H), 2.82 (dd,  $J = 13.6, 9.0$  Hz, 1H), 1.65 (s, 9H), 1.10 (t,  $J = 7.1$  Hz, 3H);  $^{13}\text{C}$  NMR (101 MHz,  $\text{CDCl}_3$ ):  $\delta$  200.8, 179.4, 157.0, 150.1, 143.4, 137.9, 136.4, 129.4, 129.1, 128.8,

126.7, 124.8, 112.1, 73.3, 64.8, 60.6, 59.3, 54.3, 40.5, 38.5, 28.8, 14.0; HRMS (ESI):  $m/z$  calcd for  $\text{C}_{29}\text{H}_{35}\text{N}_2\text{O}_3\text{S}_2$   $[\text{M}+\text{H}]^+$ : 523.2084, found 523.2090.

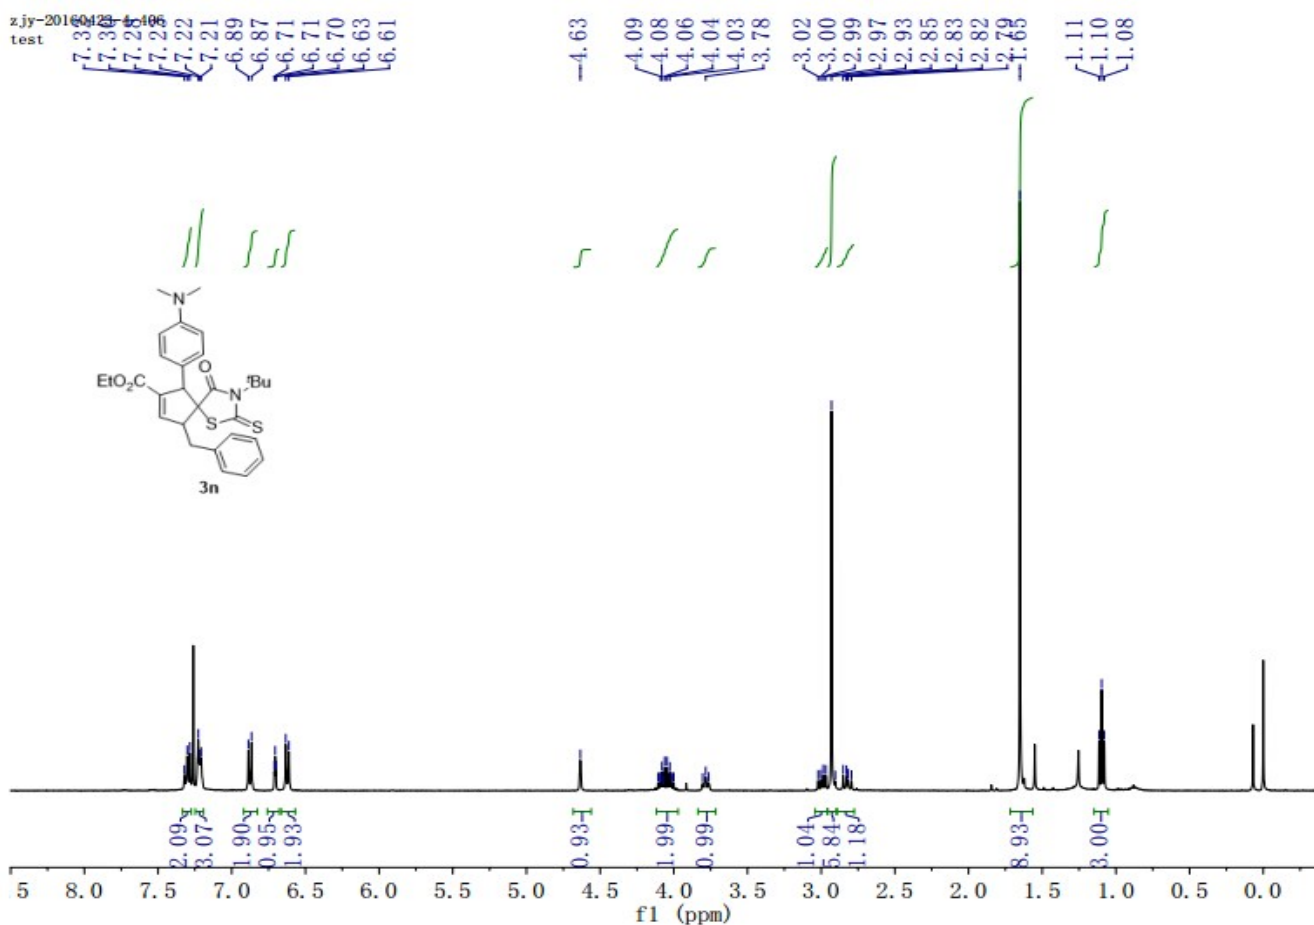

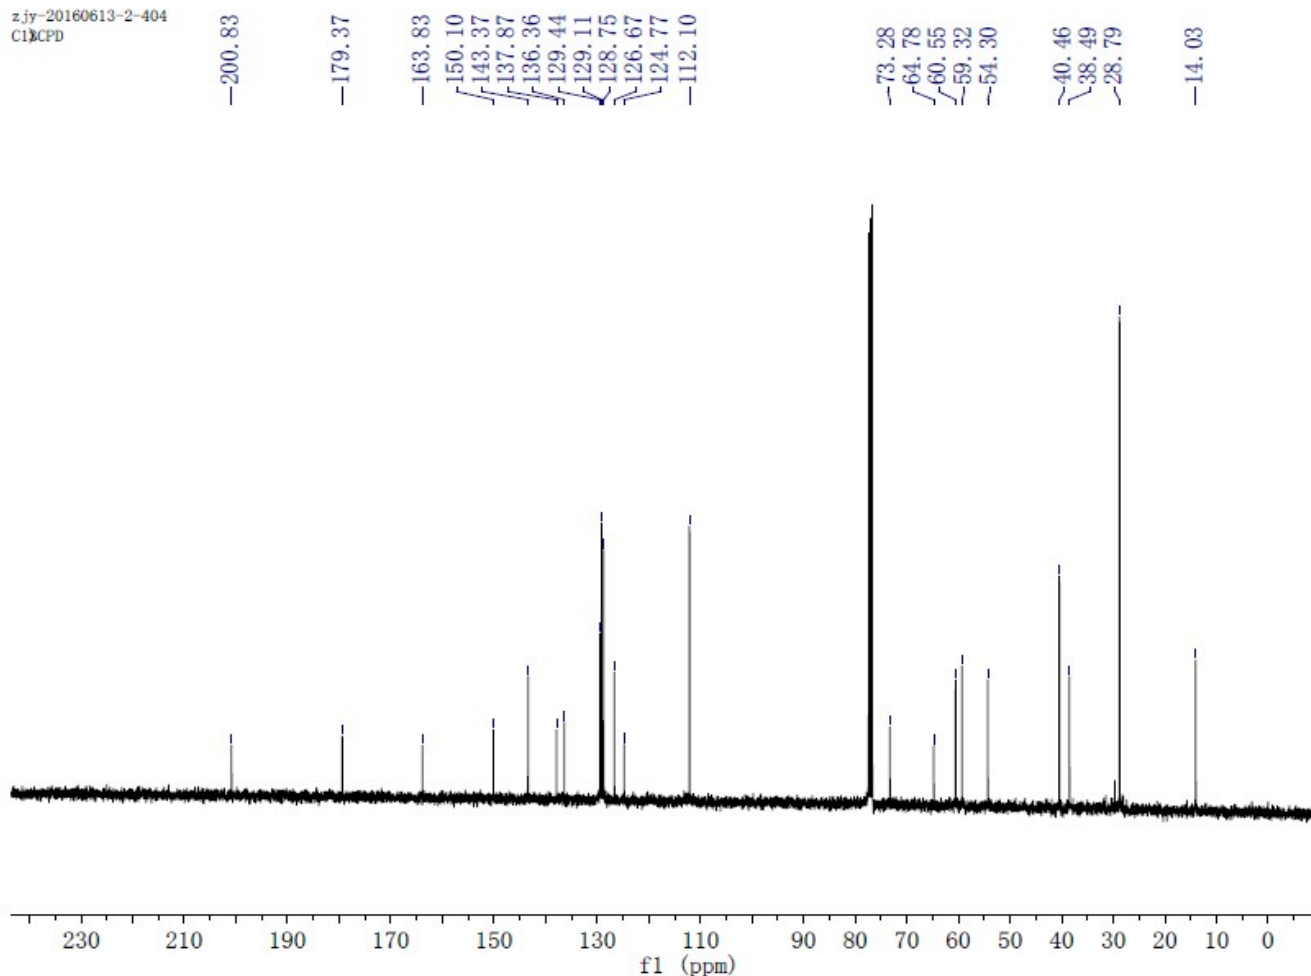

**Ethyl 9-benzyl-3-(tert-butyl)-4-oxo-2-thioxo-6-(o-tolyl)-1-thia-3-azaspiro[4.4]non-7-ene-7-carboxylate (30):**

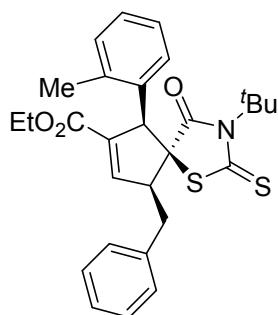

Yellow oil (43.9 mg, 89% yield); <sup>1</sup>H NMR (400 MHz, CDCl<sub>3</sub>): δ 7.33 (t, *J* = 7.3 Hz, 2H), 7.21 (dd, *J* = 8.5, 4.3 Hz, 6H), 6.99-6.90 (m, 1H), 6.83-6.71 (m, 1H), 4.98 (d, *J* = 1.1 Hz, 1H), 4.12-3.91 (m, 2H), 3.83-3.47 (m, 1H), 3.06 (dd, *J* = 13.4, 6.6 Hz, 1H), 2.69 (dd, *J* = 13.4, 10.4 Hz, 1H), 2.30 (s, 3H), 1.74 (s, 9H), 1.03 (t, *J* = 7.1 Hz, 3H); <sup>13</sup>C NMR (101 MHz, CDCl<sub>3</sub>): δ 200.7, 180.4, 163.4, 143.6, 138.0, 137.1, 137.1, 136.5, 130.8, 129.0, 128.9, 127.9, 126.9, 126.8, 126.3, 70.0, 65.0, 60.6, 55.9, 54.4, 39.4, 28.8, 20.1, 13.9; HRMS (ESI): *m/z* calcd for C<sub>28</sub>H<sub>32</sub>NO<sub>3</sub>S<sub>2</sub> [M+H]<sup>+</sup>: 494.1818, found 494.1819.



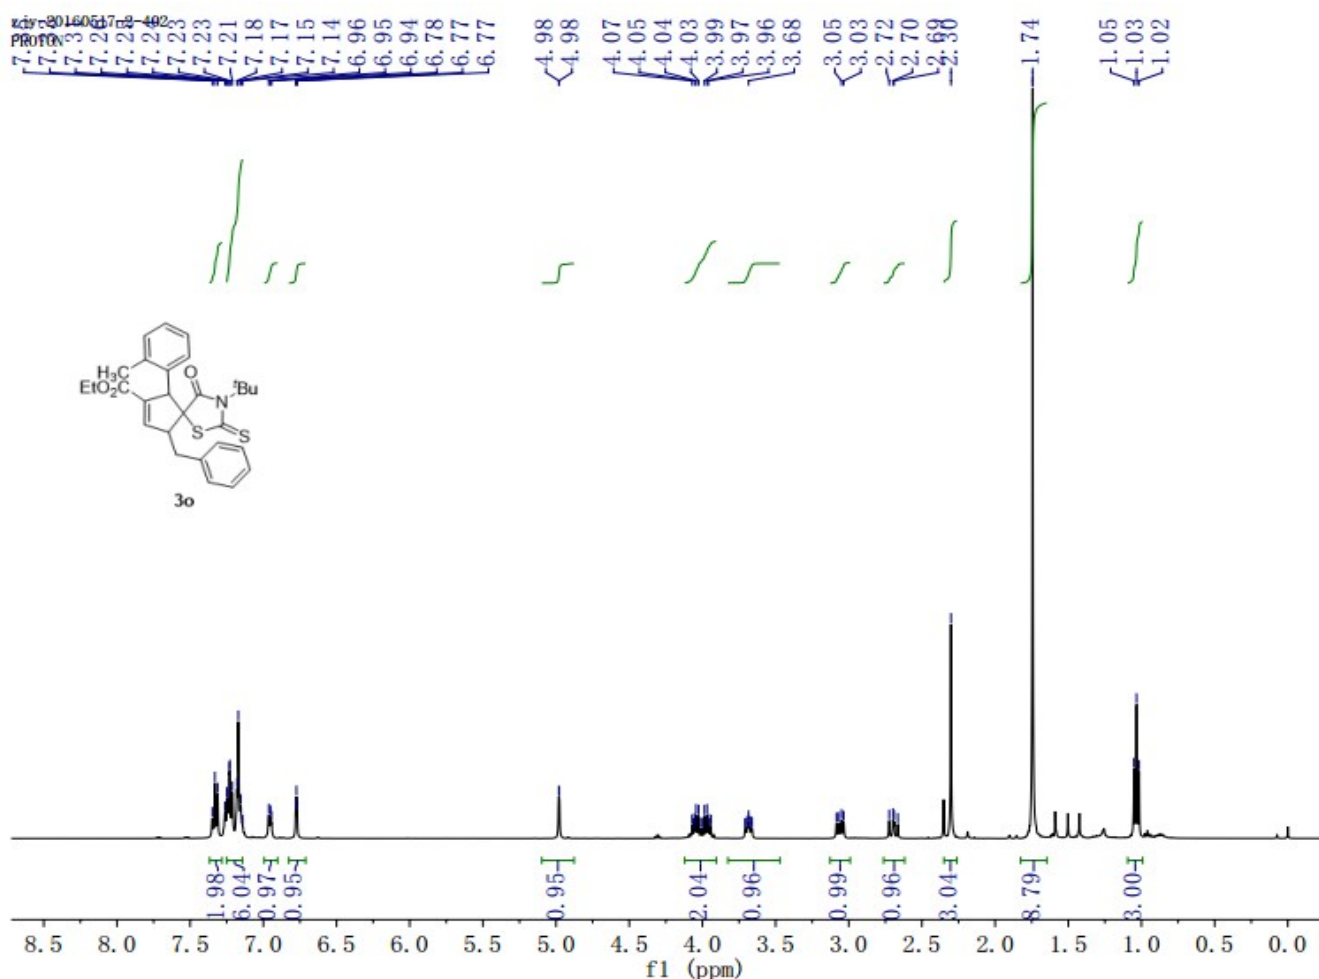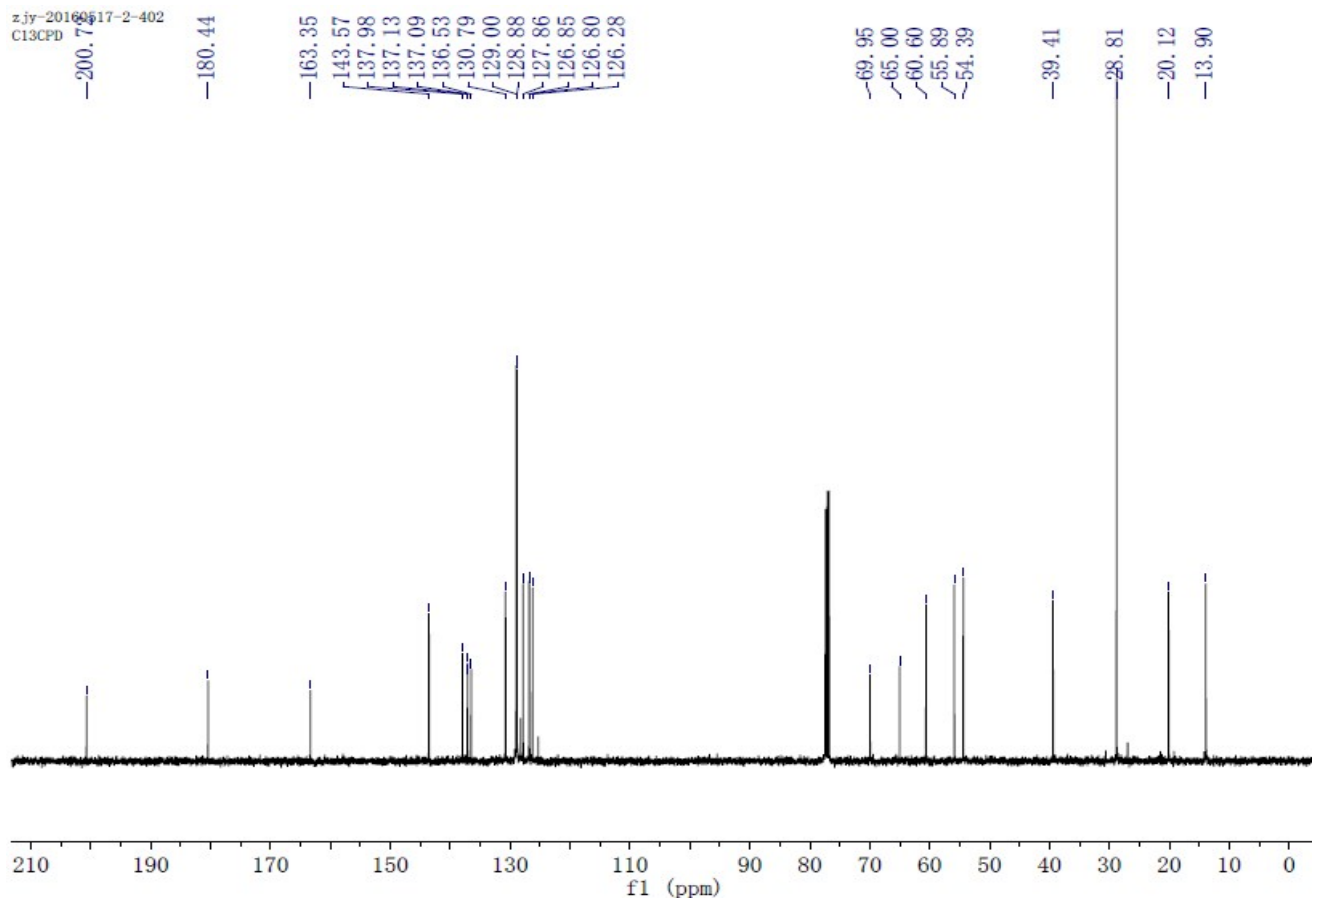

**Ethyl 9-benzyl-3-(tert-butyl)-6-(3,4-dimethylphenyl)-4-oxo-2-thioxo-1-thia-3-azaspiro[4.4]non-7-ene-7-carboxylate (3p):**

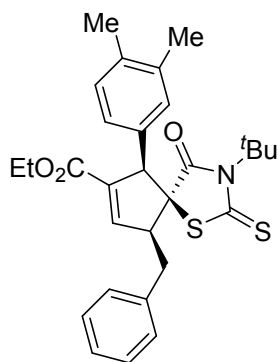

Yellow oil (43.7 mg, 86% yield);  $^1\text{H}$  NMR (400 MHz,  $\text{CDCl}_3$ ):  $\delta$  7.29 (d,  $J = 7.0$  Hz, 2H), 7.22 (d,  $J = 6.9$  Hz, 3H), 7.04 (d,  $J = 7.6$  Hz, 1H), 6.81-6.63 (m, 3H), 4.69 (s, 1H), 4.00-4.10 (m, 2H), 3.85 (t,  $J = 8.1$  Hz, 1H), 2.99 (dd,  $J = 13.6$ , 8.1 Hz, 1H), 2.87 (dd,  $J = 13.6$ , 8.7 Hz, 1H), 2.21 (s, 6H), 1.63 (s, 9H), 1.09 (t,  $J = 7.1$  Hz, 3H);  $^{13}\text{C}$  NMR (101 MHz,  $\text{CDCl}_3$ ):  $\delta$  200.8, 179.2, 163.8, 143.7, 137.7, 136.3, 136.3, 136.0, 134.4, 129.9, 129.6, 129.1, 128.8, 126.7, 126.0, 72.9,

64.9, 60.6, 59.8, 54.6, 38.2, 28.8, 19.9, 19.6, 14.0; HRMS (ESI):  $m/z$  calcd for  $\text{C}_{29}\text{H}_{34}\text{NO}_3\text{S}_2$   $[\text{M}+\text{H}]^+$ : 508.1975, found 508.1981.

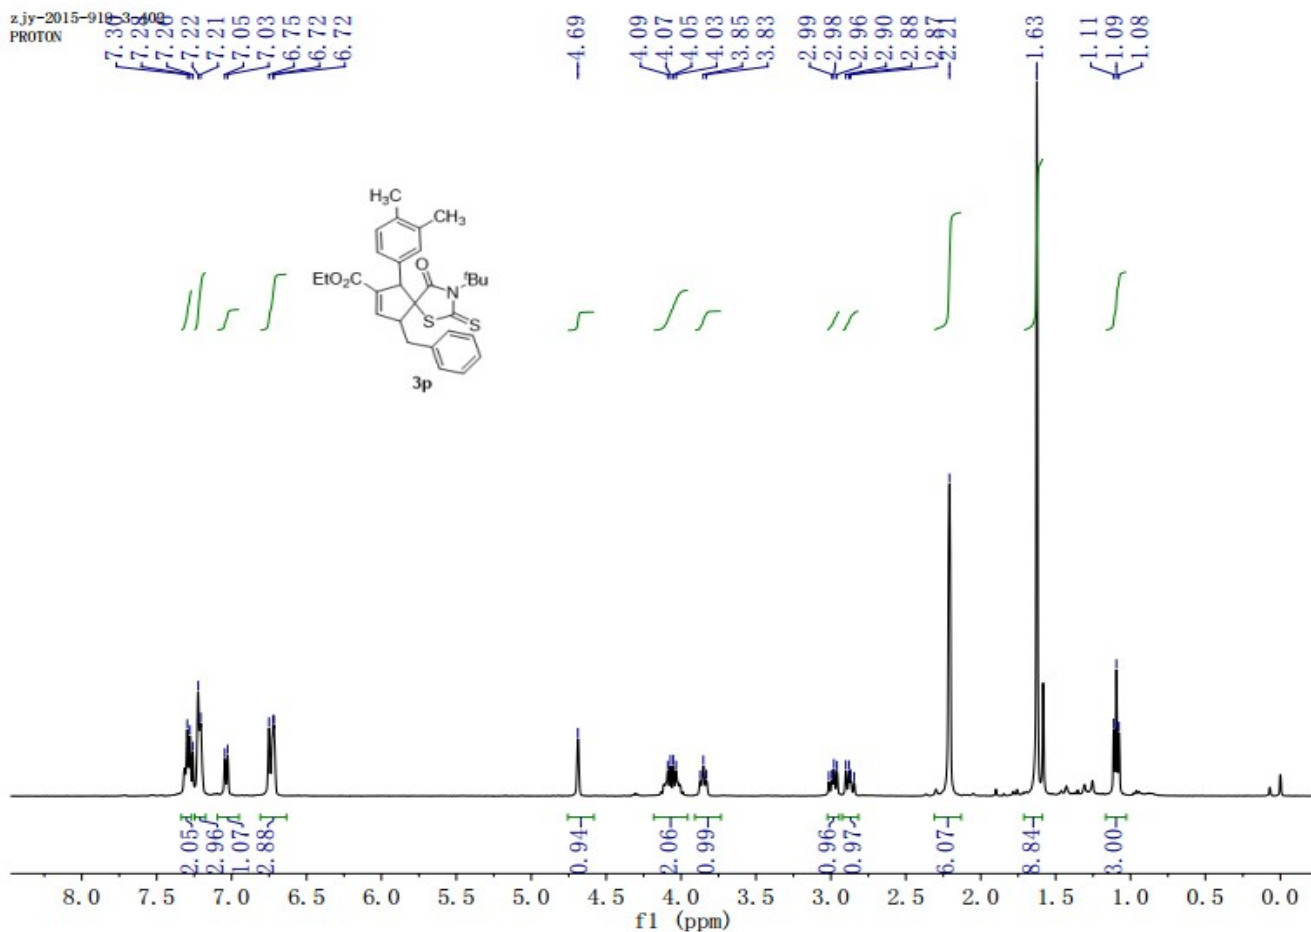

z.jy-2015-03-3-402  
C13CPD

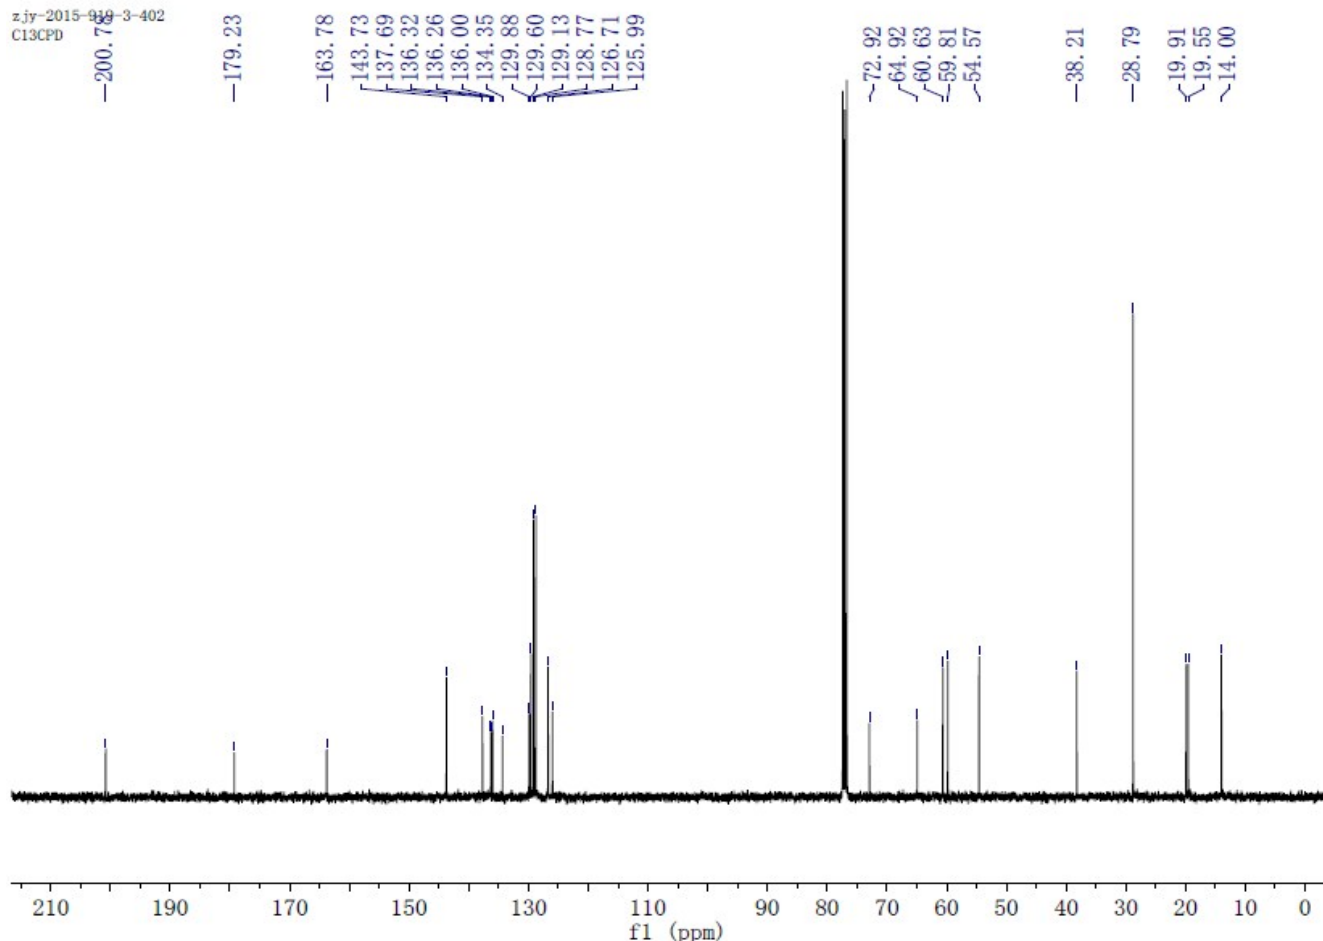

**Ethyl 9-benzyl-3-(tert-butyl)-6-(2-methoxyphenyl)-4-oxo-2-thioxo-1-thia-3-azaspiro[4.4]non-7-ene-7-carboxylate (3q):**

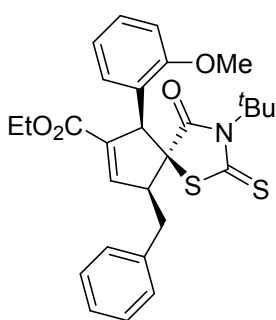

Yellow oil (42.8 mg, 84% yield);  $^1\text{H}$  NMR (400 MHz,  $\text{CDCl}_3$ ):  $\delta$  7.43-7.26 (m, 3H), 7.21 (t,  $J = 7.4$  Hz, 4H), 6.91 (d,  $J = 3.8$  Hz, 2H), 6.80 (s, 1H), 5.14 (s, 1H), 4.09-3.99 (m, 2H), 3.79 (s, 3H), 3.72 (s, 1H), 3.00 (dd,  $J = 13.1, 6.4$  Hz, 1H), 2.66-2.48 (m, 1H), 1.77 (s, 9H), 1.08 (t,  $J = 7.1$  Hz, 3H);  $^{13}\text{C}$  NMR (101 MHz,  $\text{CDCl}_3$ ):  $\delta$  201.5, 180.3, 163.6, 157.5, 145.1, 138.0, 135.1, 129.2, 129.0, 128.8,

127.7, 126.9, 126.7, 120.4, 110.6, 69.9, 64.8, 60.6, 55.7, 54.7, 52.4, 39.1, 28.9, 14.0; HRMS (ESI):  $m/z$  calcd for  $\text{C}_{28}\text{H}_{32}\text{NO}_4\text{S}_2$   $[\text{M}+\text{H}]^+$ : 510.1767, found 510.1771.

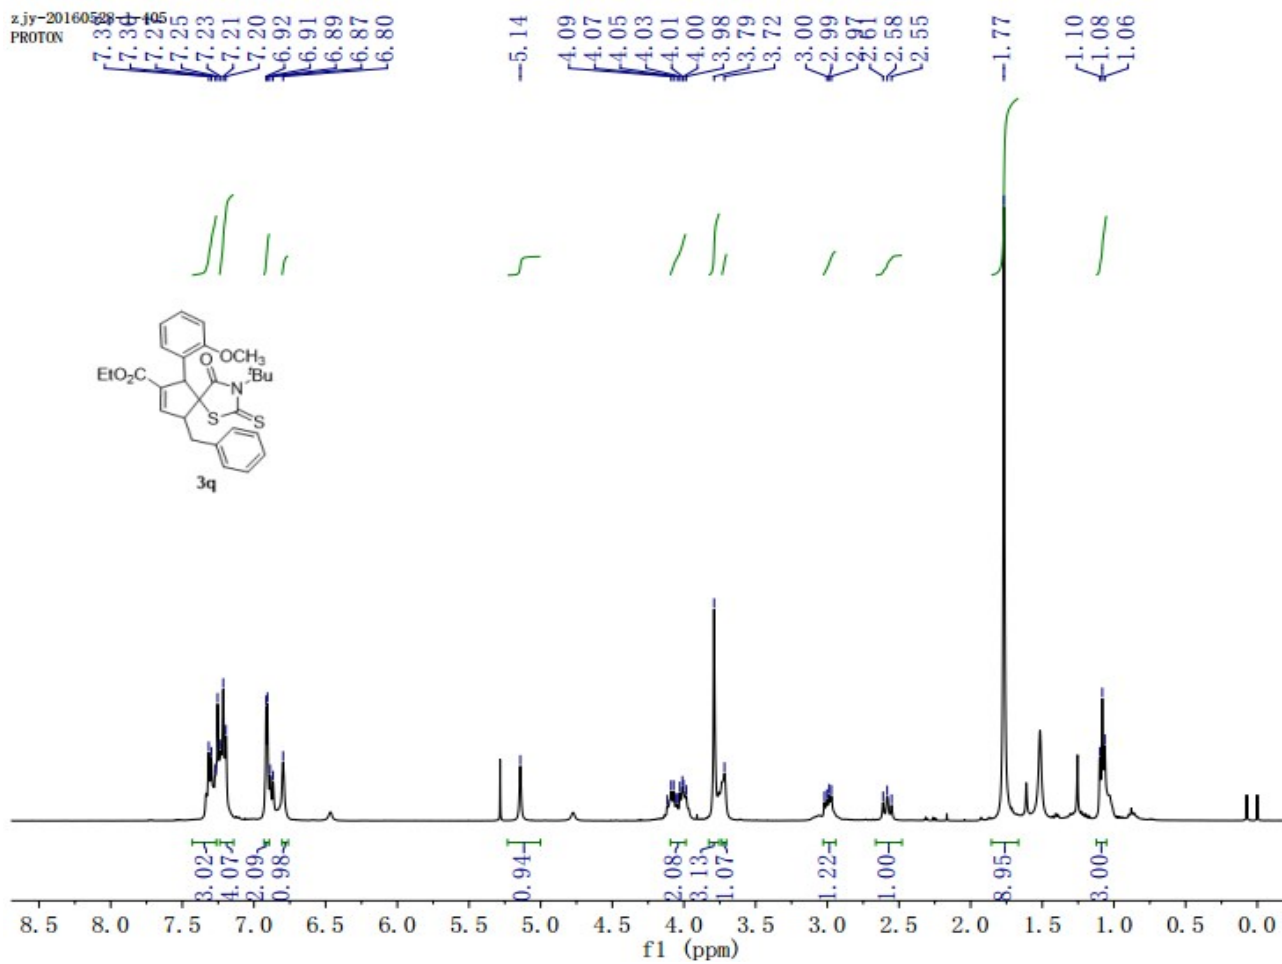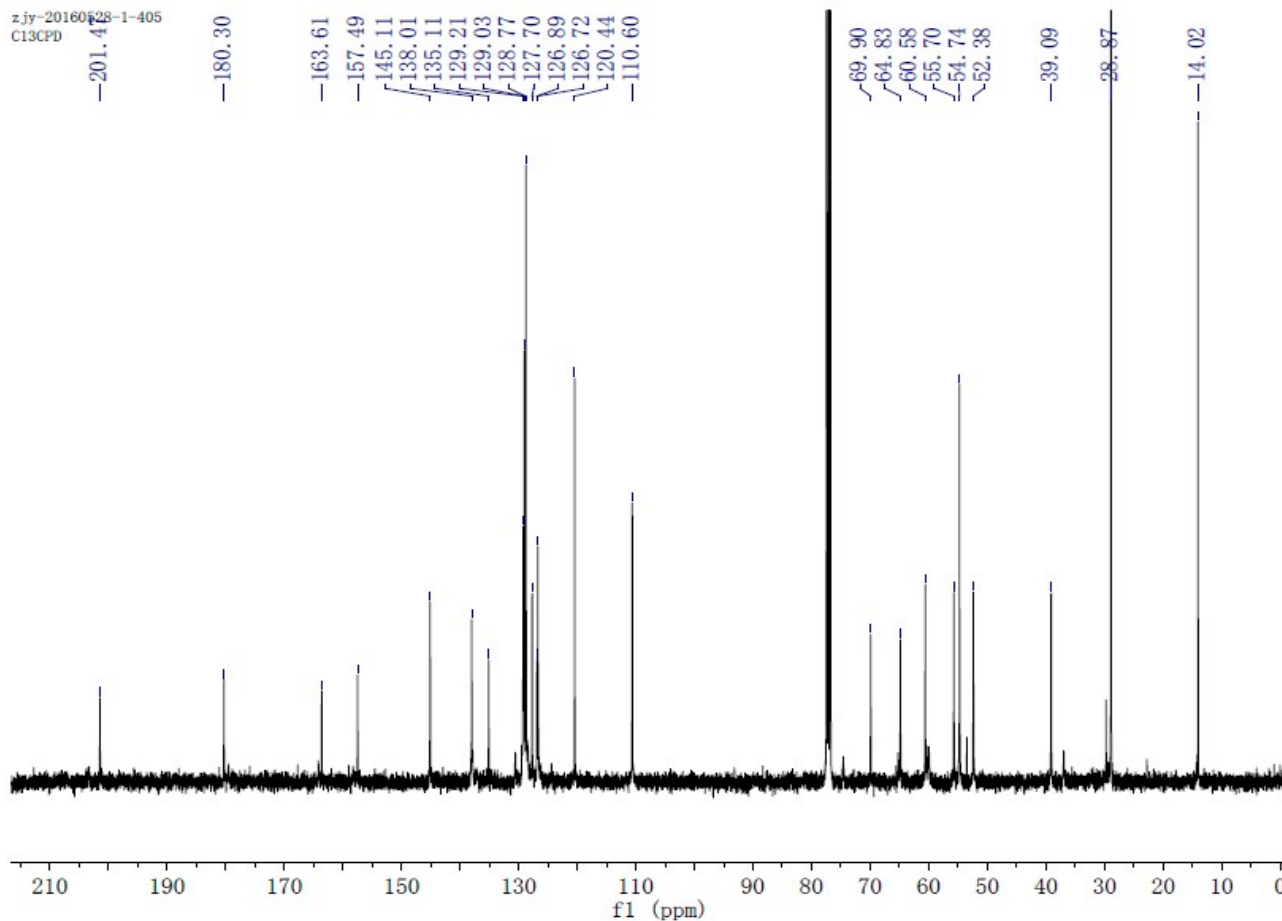

**Ethyl 9-benzyl-3-(tert-butyl)-6-(naphthalen-1-yl)-4-oxo-2-thioxo-1-thia-3-azaspiro[4.4]non-7-ene-7-carboxylate (3r):**

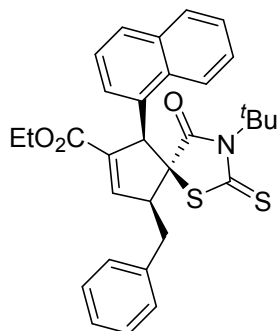

Yellow oil (46.1 mg, 87% yield); <sup>1</sup>H NMR (400 MHz, CDCl<sub>3</sub>): δ 7.97-7.89 (m, 1H), 7.84 (dd, *J* = 5.9, 3.5 Hz, 1H), 7.78 (d, *J* = 8.0 Hz, 1H), 7.52-7.44 (m, 2H), 7.44-7.39 (m, 1H), 7.33-7.27 (m, 2H), 7.23 (d, *J* = 8.0 Hz, 3H), 7.16-7.12 (m, 1H), 6.85 (t, *J* = 2.3 Hz, 1H), 5.68 (s, 1H), 4.06-3.94 (m, 2H), 3.94-3.73 (m, 1H), 3.02 (dd, *J* = 13.7, 7.8 Hz, 1H), 2.87 (dd, *J* = 13.7, 8.9 Hz, 1H), 1.57 (s, 9H), 0.92 (t, *J* = 7.1 Hz, 3H); <sup>13</sup>C NMR (101 MHz, CDCl<sub>3</sub>): δ 200.9, 180.2, 163.7, 144.2, 137.7, 136.3, 134.4, 133.9, 132.2, 129.3, 129.1, 128.8, 128.7, 126.8, 126.6, 126.0, 125.8, 125.0, 122.8, 72.2, 65.2, 60.6, 55.9, 54.4, 38.5, 28.6, 13.9; HRMS (ESI): *m/z* calcd for C<sub>31</sub>H<sub>32</sub>NO<sub>3</sub>S<sub>2</sub> [M+H]<sup>+</sup>: 530.1818, found 530.1818.

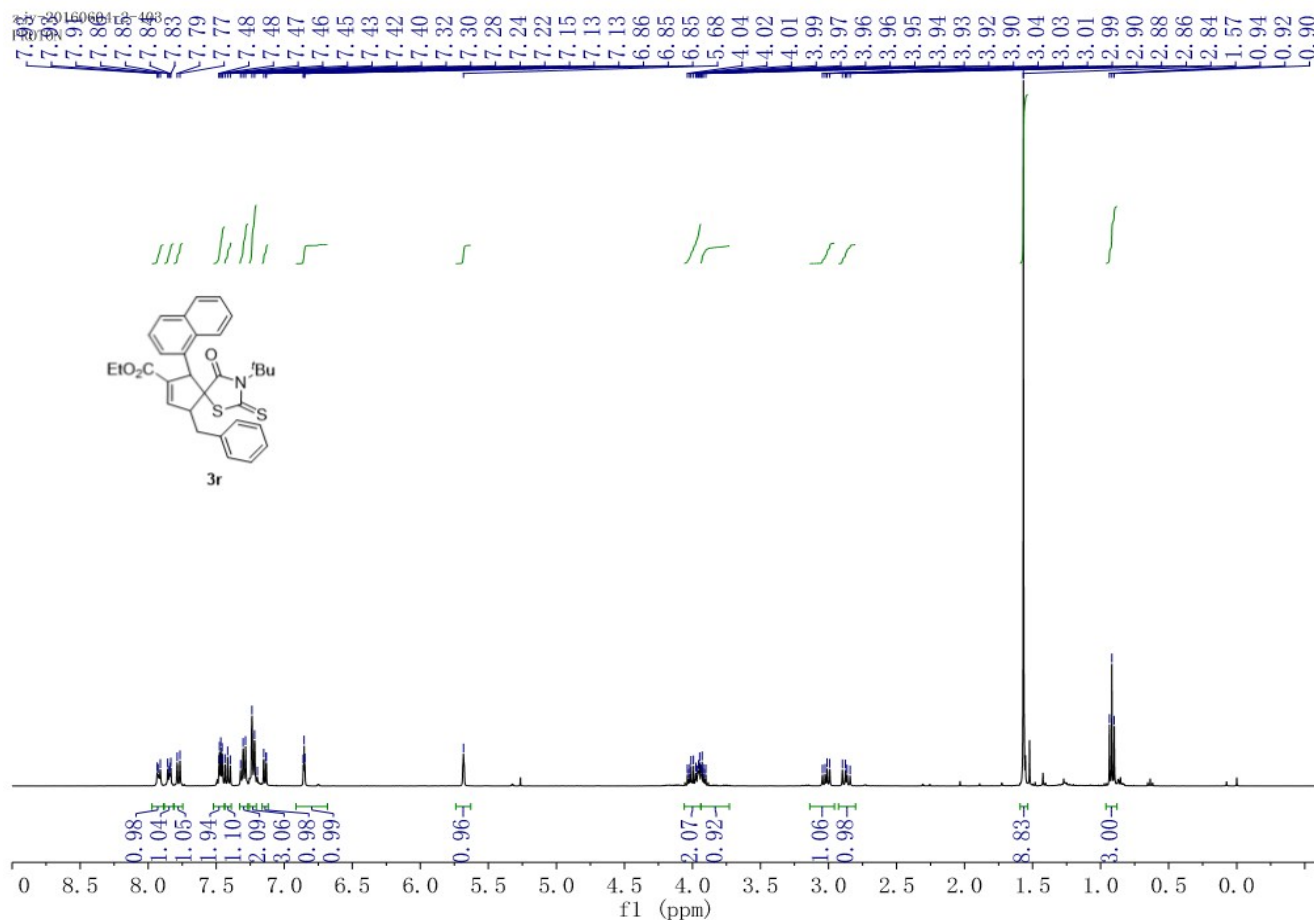

zjy-20160603-2-404  
C13CPD

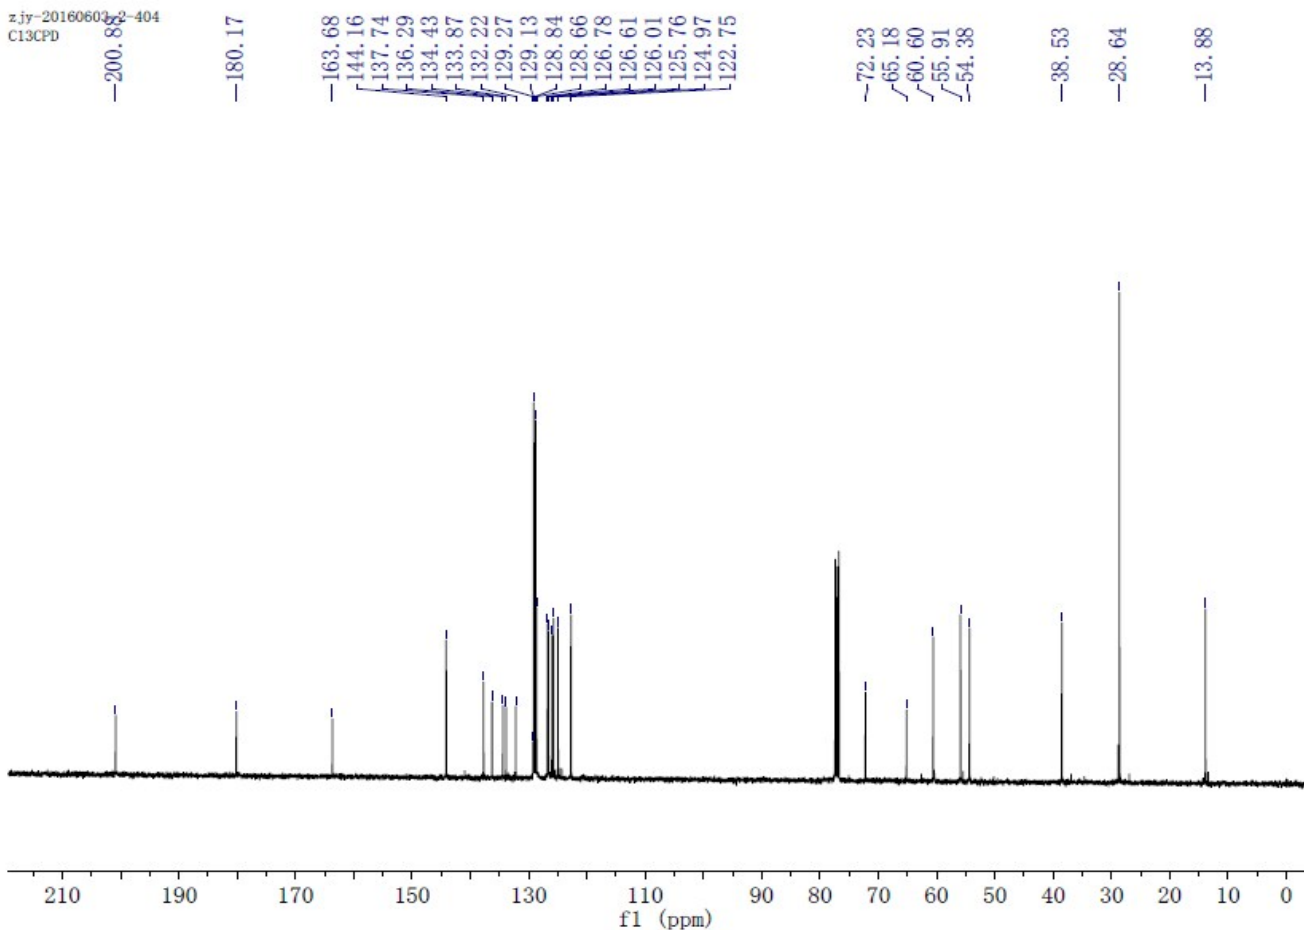

**Ethyl 9-benzyl-3-(tert-butyl)-4-oxo-6-(thiophen-2-yl)-2-thioxo-1-thia-3-azaspiro[4.4]non-7-ene-7-carboxylate (3s):**

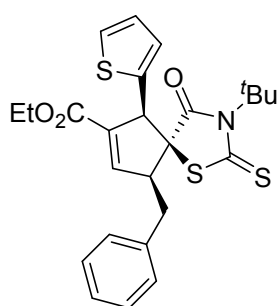

Yellow oil (48.1 mg, 99% yield);  $^1\text{H}$  NMR (400 MHz,  $\text{CDCl}_3$ ):  $\delta$  7.31 (t,  $J = 7.2$  Hz, 2H), 7.22 (t,  $J = 8.6$  Hz, 4H), 6.97 (t,  $J = 3.5$  Hz, 1H), 6.83 (s, 1H), 6.71 (s, 1H), 4.95 (s, 1H), 4.18-4.04 (m, 2H), 3.74 (t,  $J = 8.3$  Hz, 1H), 3.06 (dd,  $J = 13.4, 7.5$  Hz, 1H), 2.91-2.81 (m, 1H), 1.68 (s, 9H), 1.12 (t,  $J = 7.1$  Hz, 3H);  $^{13}\text{C}$  NMR (101 MHz,  $\text{CDCl}_3$ ):  $\delta$  200.3, 179.0, 163.3, 144.0, 140.9, 137.7, 136.0,

129.1, 128.8, 127.4, 127.1, 126.8, 125.4, 71.9, 65.0, 60.8, 54.5, 54.4, 39.1, 28.8, 14.0; HRMS (ESI):  $m/z$  calcd for  $\text{C}_{25}\text{H}_{28}\text{NO}_3\text{S}_3$   $[\text{M}+\text{H}]^+$ : 486.1226, found 486.1224.

zjy-20160530-1-404  
PROTON

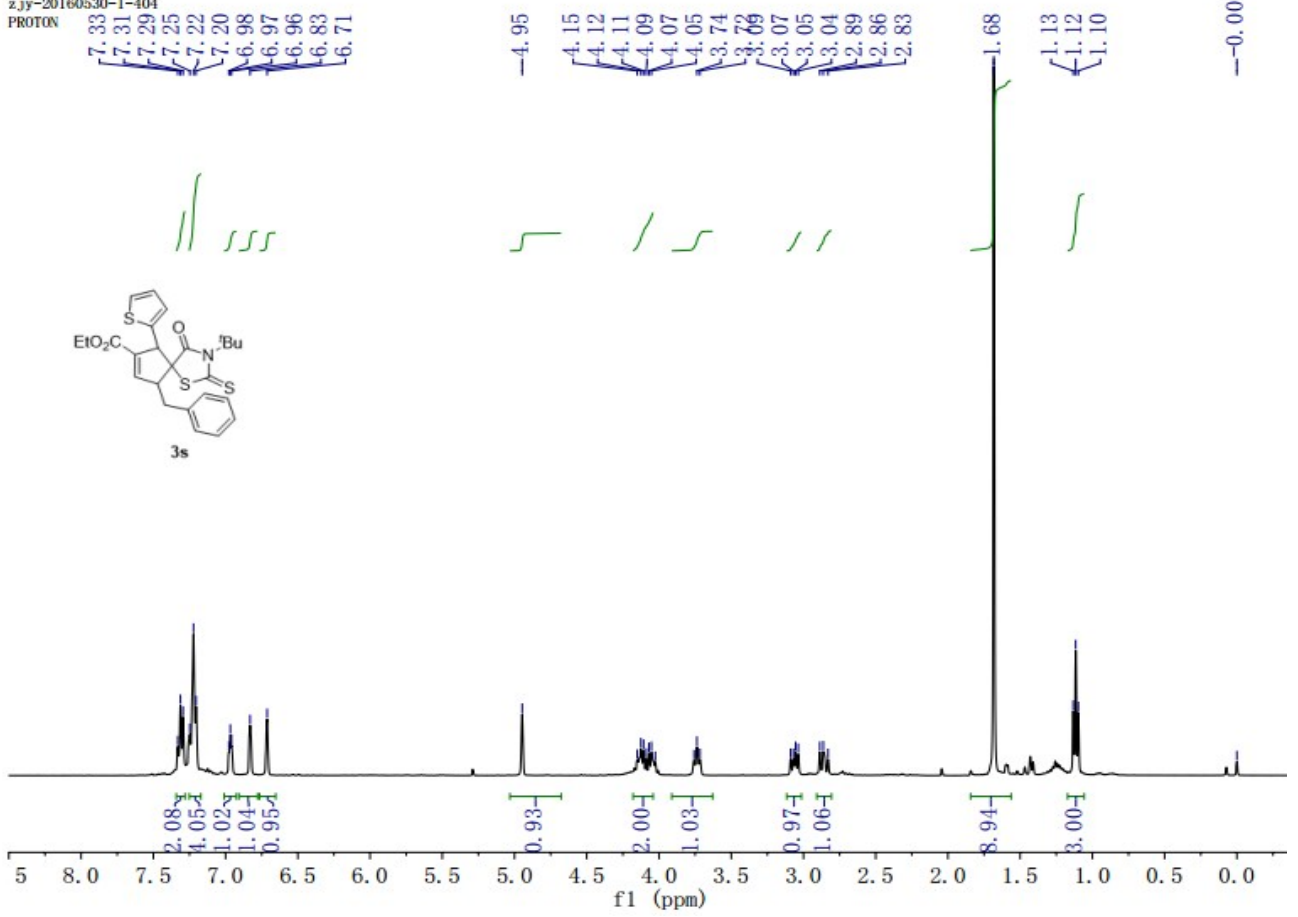

zjy-20160530-1-404  
C13CPD

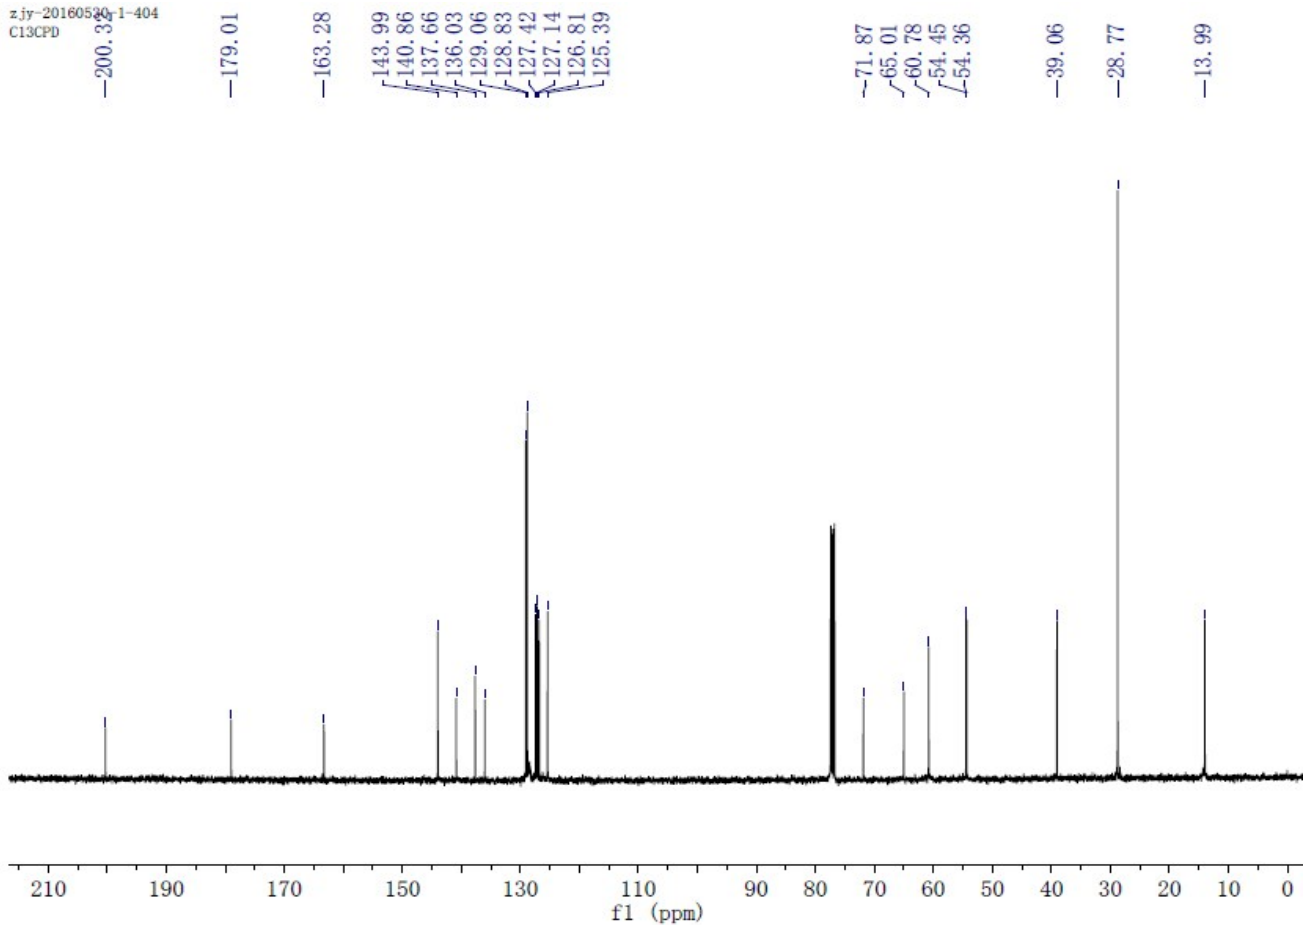



**Ethyl 3-(tert-butyl)-4-oxo-6,9-diphenyl-2-thioxo-1-thia-3-azaspiro [4.4]non-7-ene-7-carboxylate (3t):**

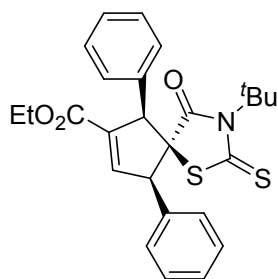

Yellow oil (42.4 mg, 91% yield);  $^1\text{H}$  NMR (400 MHz,  $\text{CDCl}_3$ ):  $\delta$  7.34 (d,  $J=7.0$  Hz, 2H), 7.27 (d,  $J=7.0$  Hz, 3H), 7.23 (s, 1H), 7.17-6.97 (m, 5H), 4.93 (s, 1H), 4.86 (s, 1H), 4.15-4.03 (m, 2H), 1.78 (s, 9H), 1.08 (t,  $J=7.1$  Hz, 3H);  $^{13}\text{C}$  NMR (101 MHz,  $\text{CDCl}_3$ ):  $\delta$  200.2, 179.6, 163.6, 143.0, 137.5, 137.4, 137.1, 129.0, 128.9, 128.8, 128.7, 128.6, 128.5, 128.4, 128.3, 127.9, 126.9, 74.8, 65.0, 60.8,

59.6, 58.8, 29.0, 13.9; HRMS (ESI):  $m/z$  calcd for  $\text{C}_{26}\text{H}_{28}\text{NO}_3\text{S}_2$   $[\text{M}+\text{H}]^+$ : 466.1505, found 466.1502.

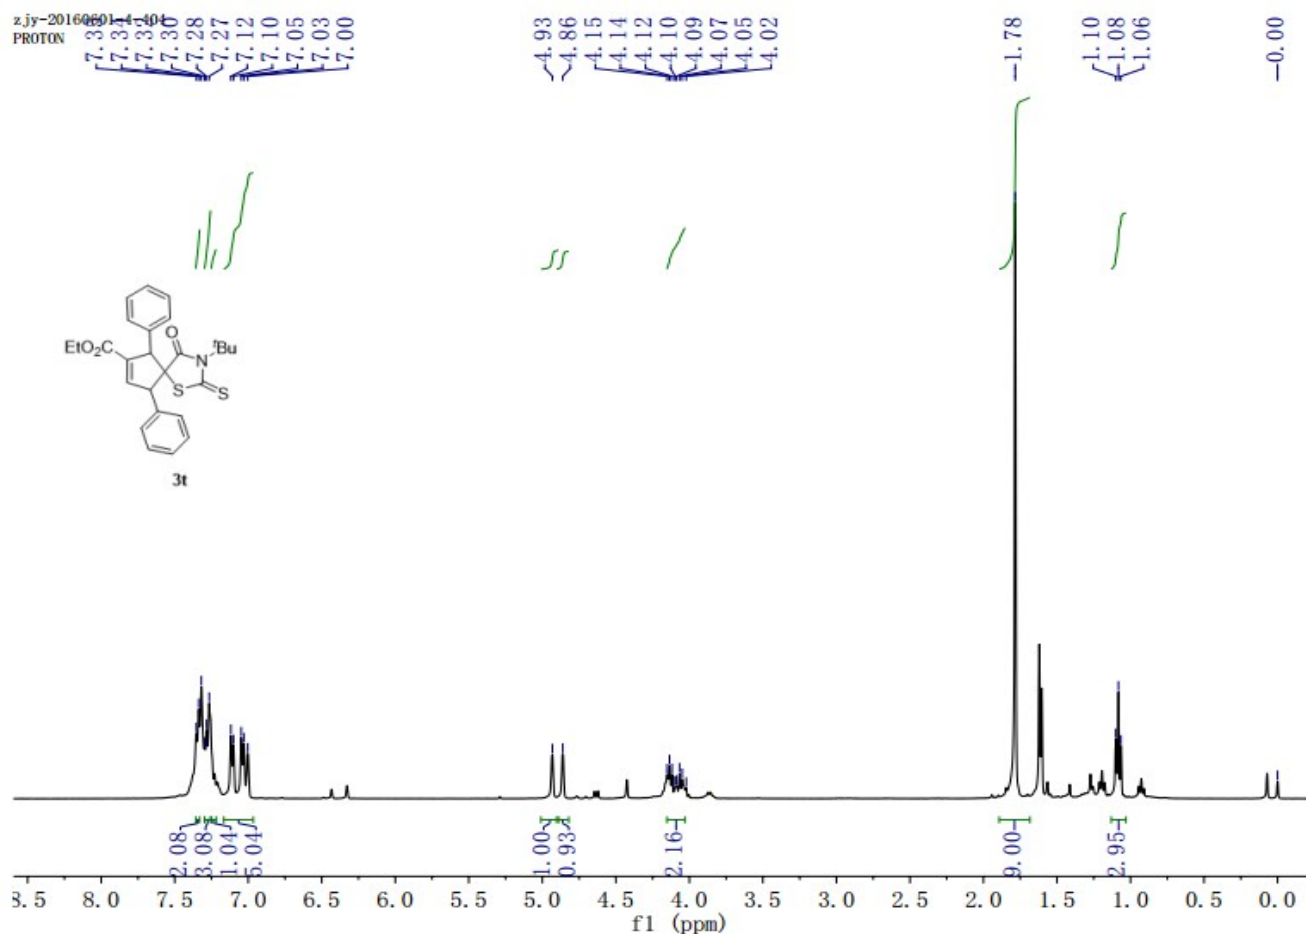



zjy-20160608-3-404  
C13CPD

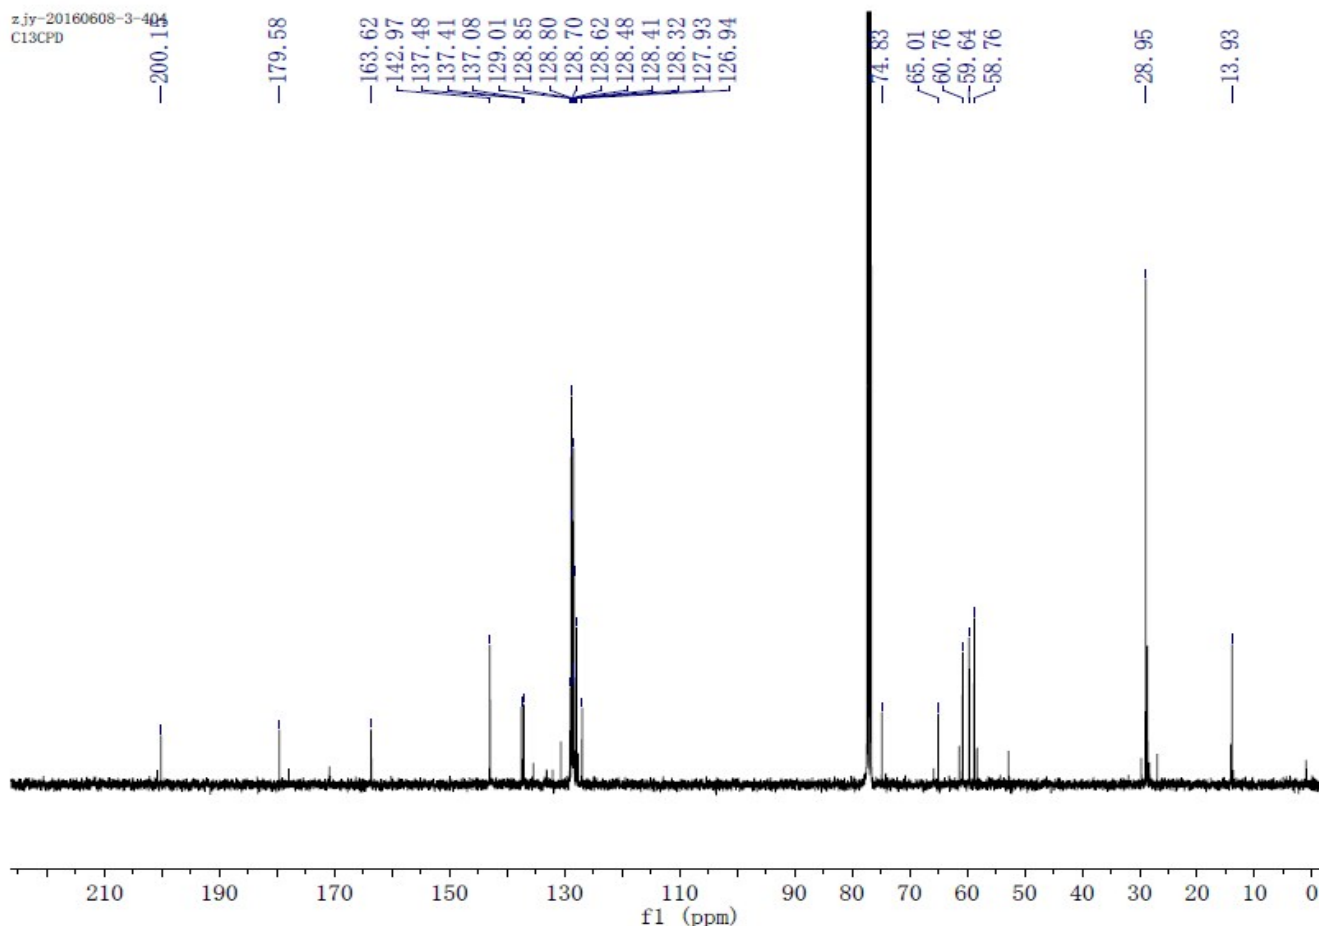

**Ethyl 6-(2-bromophenyl)-3-(tert-butyl)-4-oxo-9-phenyl-2-thioxo-1-thia-3-azaspiro[4.4]non-7-ene-7-carboxylate (3u):**

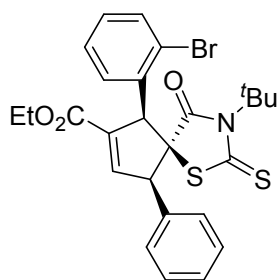

Yellow oil (50.6 mg, 93% yield);  $^1\text{H}$  NMR (400 MHz,  $\text{CDCl}_3$ ):  $\delta$  7.55 (d,  $J = 7.9$  Hz, 1H), 7.32 (dd,  $J = 14.5, 8.6$  Hz, 4H), 7.13-6.99 (m, 5H), 5.45 (s, 1H), 4.73 (s, 1H), 4.17-4.00 (m, 2H), 1.86 (s, 9H), 1.07 (t,  $J = 7.1$  Hz, 3H);  $^{13}\text{C}$  NMR (101 MHz,  $\text{CDCl}_3$ ):  $\delta$  201.2, 181.1, 163.1, 143.2, 138.6, 137.5, 133.1, 129.3, 129.0, 128.9, 128.8, 128.6, 128.4, 127.5, 126.4, 71.5, 65.4, 61.6, 60.8, 58.2,

29.0, 13.9; HRMS (ESI):  $m/z$  calcd for  $\text{C}_{26}\text{H}_{27}\text{BrNO}_3\text{S}_2$   $[\text{M}+\text{H}]^+$ : 544.0610, found 544.0646.

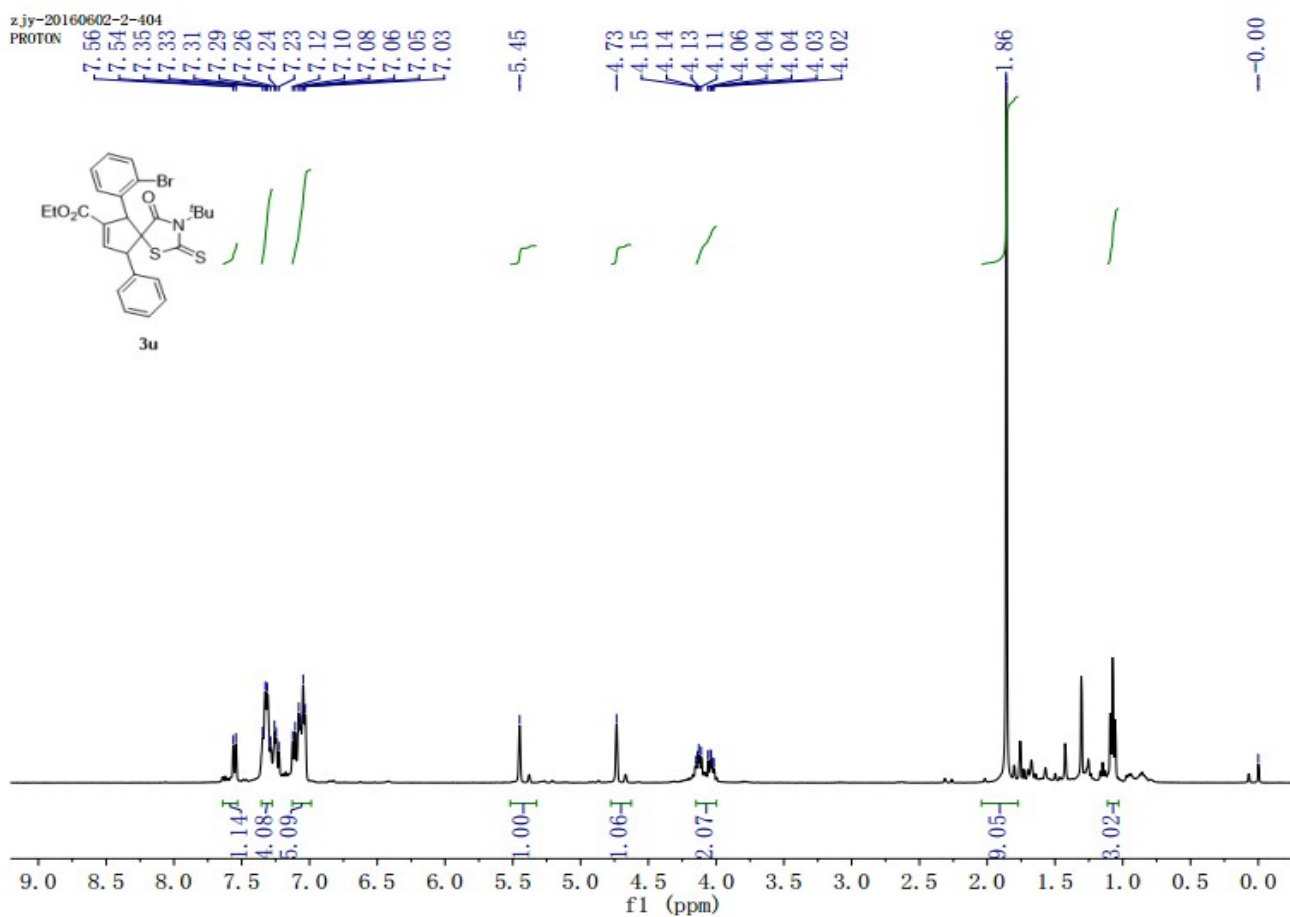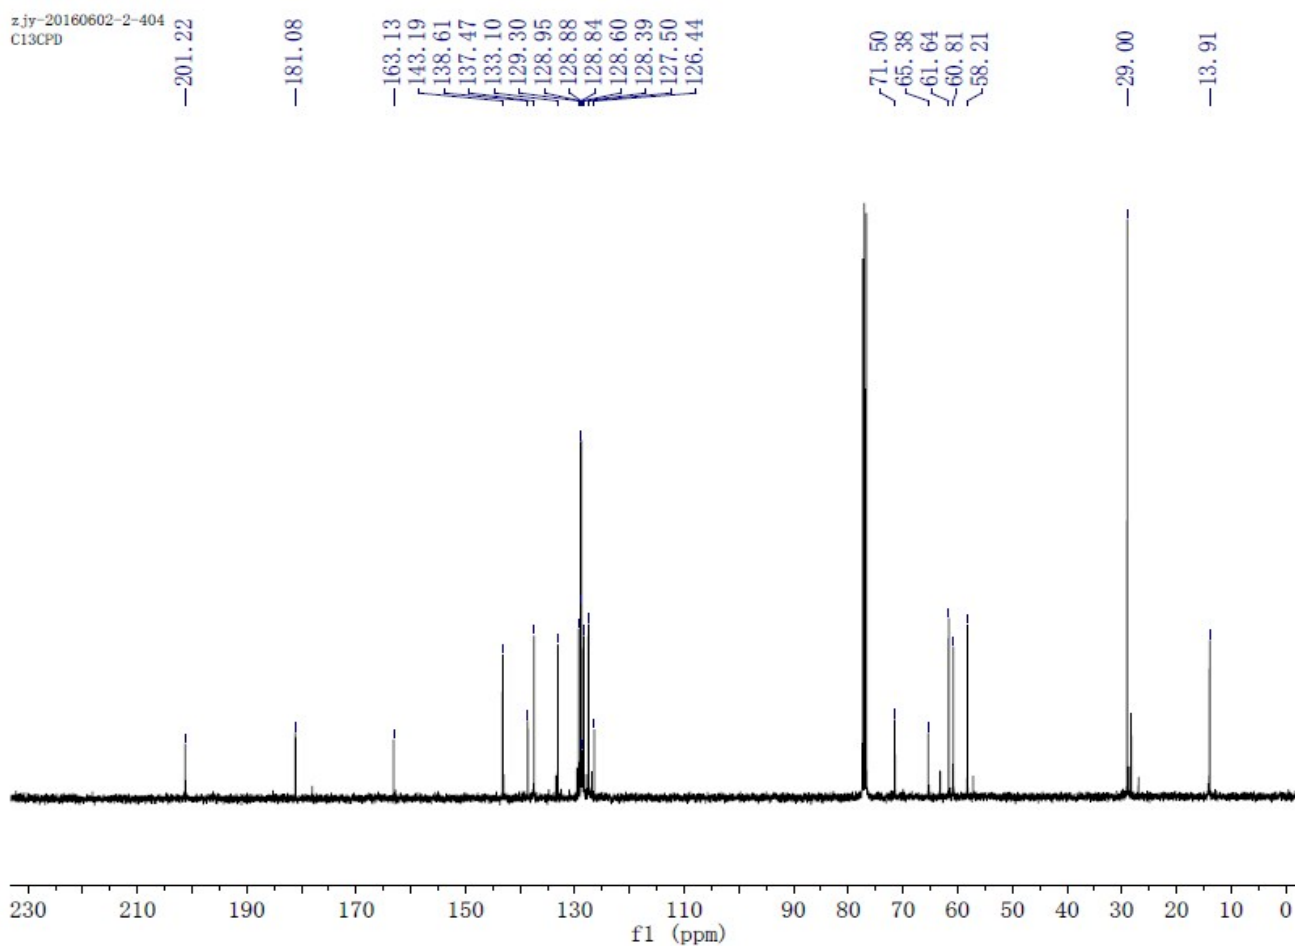

**Ethyl 3-(tert-butyl)-6-(4-isopropylphenyl)-4-oxo-9-phenyl-2-thioxo-1-thia-3-azaspiro[4.4]non-7-ene-7-carboxylate (3v):**

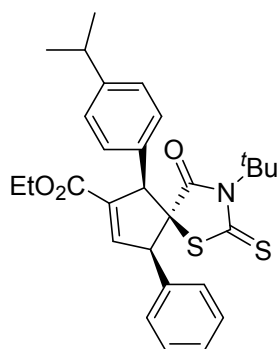

Yellow oil (41.1 mg, 81% yield);  $^1\text{H NMR}$  (400 MHz,  $\text{CDCl}_3$ ):  $\delta$  7.33 (ddd,  $J = 15.1, 14.1, 9.1$  Hz, 4H), 7.14 (ddd,  $J = 15.0, 8.0, 3.3$  Hz, 4H), 7.07-6.88 (m, 2H), 4.89 (t,  $J = 2.2$  Hz, 1H), 4.83 (t,  $J = 2.1$  Hz, 1H), 4.26-3.95 (m, 2H), 2.87 (dd,  $J = 14.0, 7.0$  Hz, 1H), 1.89-1.39 (m, 9H), 1.22 (ddd,  $J = 7.6, 7.0, 1.1$  Hz, 6H), 1.08 (t,  $J = 7.1$  Hz, 3H);  $^{13}\text{C NMR}$  (101 MHz,  $\text{CDCl}_3$ ):  $\delta$  200.4, 179.6, 163.6, 148.5, 142.5, 137.7, 137.3, 134.7, 128.9, 128.8, 128.6, 128.3, 127.6, 127.0, 126.4, 74.7, 65.0, 60.7, 59.2, 58.7, 33.8, 28.9, 23.9, 13.9; HRMS (ESI):  $m/z$  calcd for  $\text{C}_{29}\text{H}_{34}\text{NO}_3\text{S}_2$   $[\text{M}+\text{H}]^+$ : 508.1975, found 508.1982.

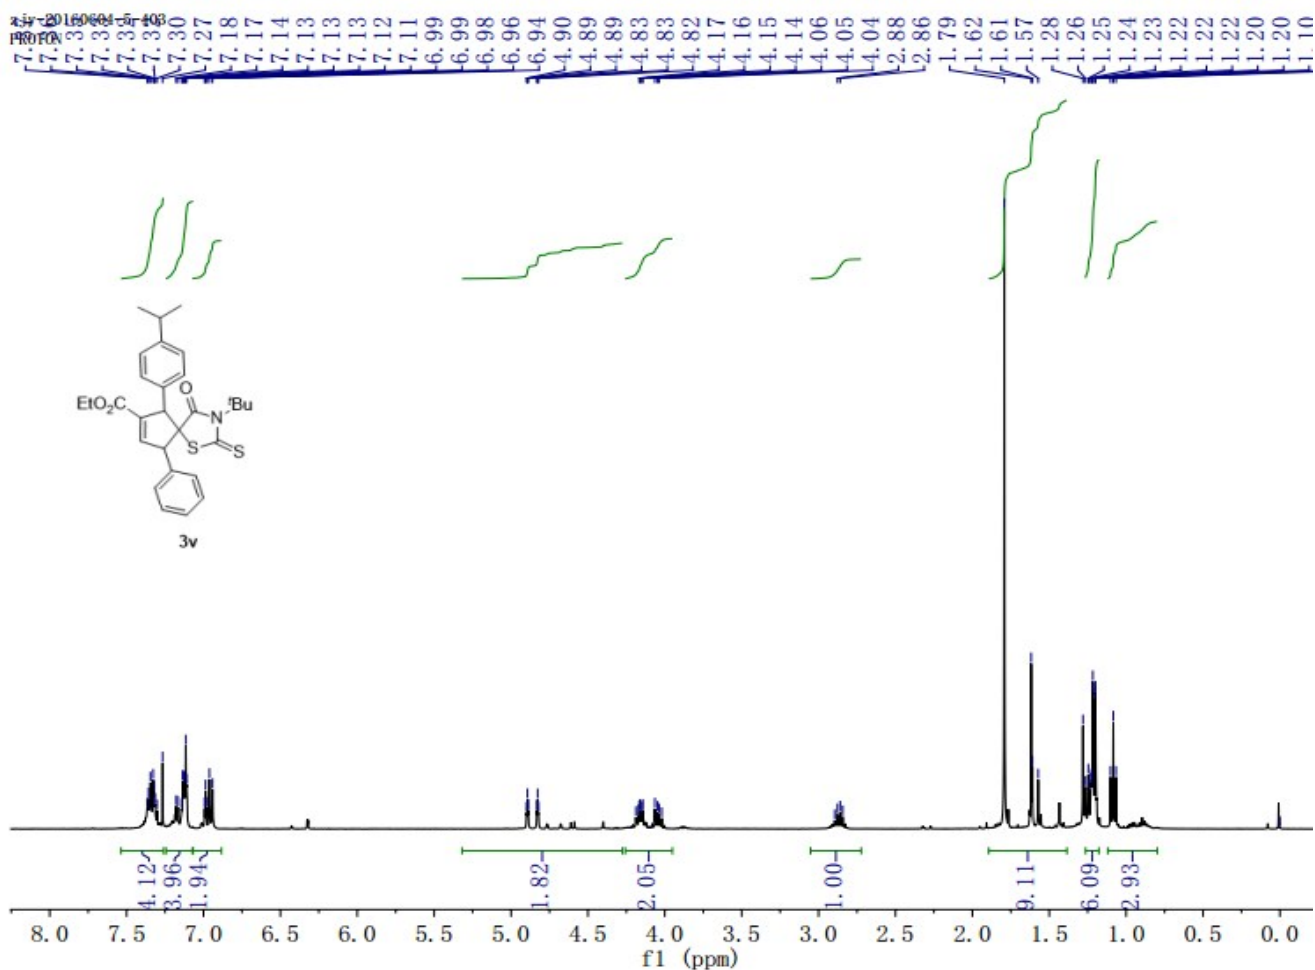

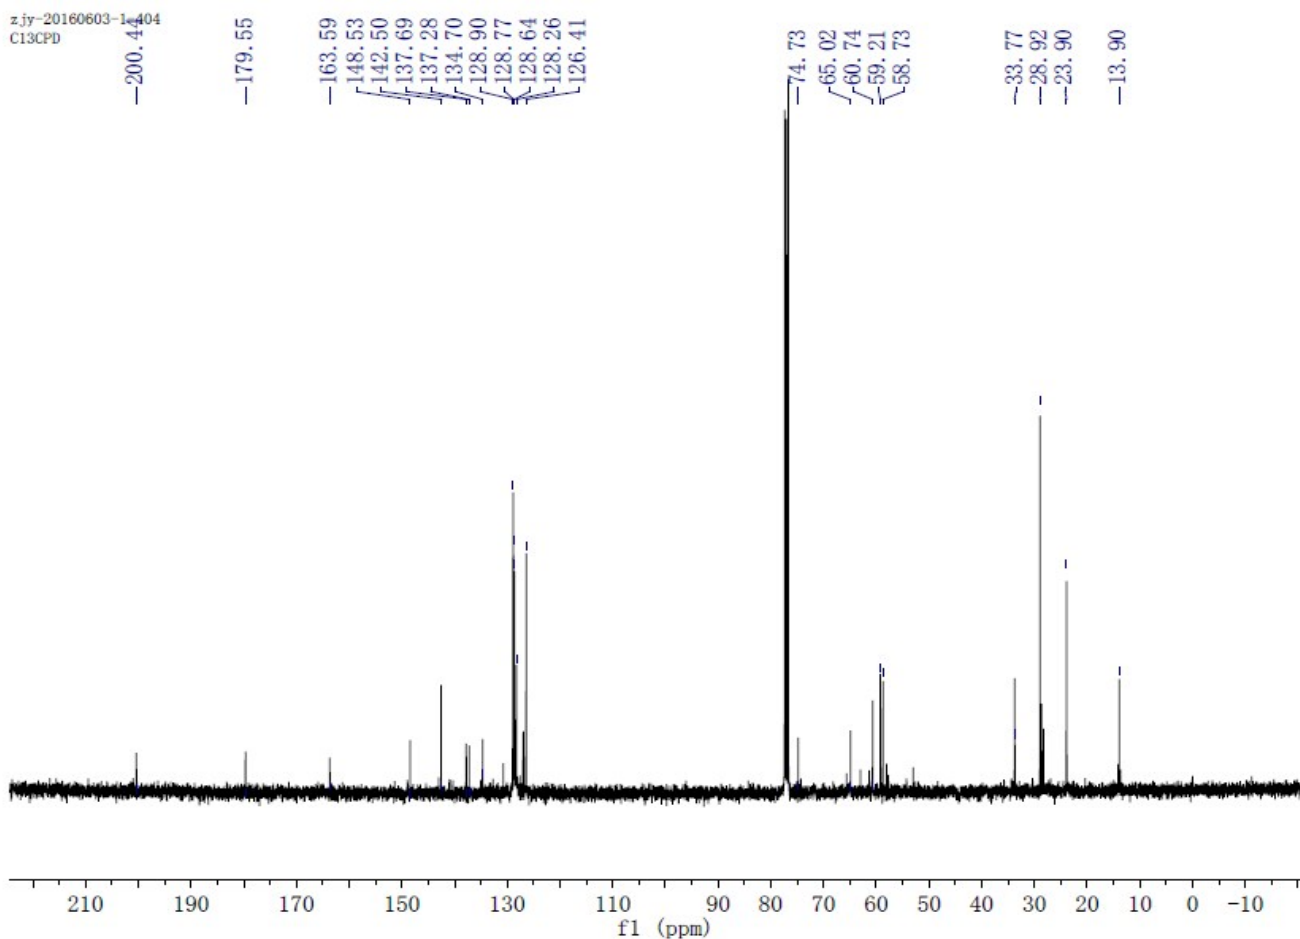

### General procedure for one-pot sequential [3+2]/[3+2] cycloaddition for products **7**:

A mixture of amine **5** (0.22 mmol, 2.2 equiv.) and carbon disulfide **6** (0.11 mmol, 1.1 equiv.) in dry toluene (1.0 mL) was stirred at room temperature for about 3 h.  $\text{PBU}_3$  (4.1 mg, 0.02 mmol, 20 mmol%) and phenylethylpropiolate **4** (0.1 mmol, 1 equiv.) were added to the mixture under  $\text{N}_2$ . After stirring for 6 h at room temperature, ethyl 5-phenylpent-2-ynoate **1a** (30.3 mg, 0.15 mmol, 1.5 equiv.) was added slowly and the mixture was stirred 15 hours at room temperature. The reaction was monitored by TLC spectroscopy. After the reaction was completed, the reaction mixture was directly purified by flash column chromatograph (eluted with 20:1 petroleum ether/EtOAc) to afford the product **7**.

**Ethyl 3,9-dibenzyl-4-oxo-6-phenyl-2-thioxo-1-thia-3-azaspiro[4.4] non-7-ene-7-carboxylate (7a):**

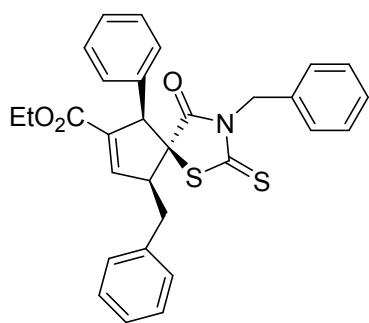

Yellow oil (43.6 mg, 85% yield);  $^1\text{H}$  NMR (400 MHz,  $\text{CDCl}_3$ ):  $\delta$  7.26 (d,  $J = 3.2$  Hz, 5H), 7.18 (dd,  $J = 12.7, 6.4$  Hz, 6H), 7.11 (d,  $J = 7.3$  Hz, 2H), 6.76 (dd,  $J = 13.7, 4.5$  Hz, 3H), 4.88 (d,  $J = 14.6$  Hz, 2H), 4.47 (d,  $J = 14.3$  Hz, 1H), 4.14-4.05 (m, 1H), 4.04-3.95 (m, 2H), 3.08 (dd,  $J = 13.8, 7.2$  Hz, 1H), 2.99-2.86 (m, 1H), 1.03 (t,  $J = 7.1$  Hz, 3H);  $^{13}\text{C}$  NMR (101

MHz,  $\text{CDCl}_3$ ):  $\delta$  198.7, 177.8, 163.8, 144.1, 136.8, 136.2, 136.1, 134.7, 129.1, 128.6, 128.5, 128.4, 128.3, 127.9, 126.9, 76.1, 60.8, 60.7, 55.6, 47.2, 37.1, 13.9; HRMS (ESI):  $m/z$  calcd for  $\text{C}_{30}\text{H}_{28}\text{NO}_3\text{S}_2$   $[\text{M}+\text{H}]^+$ : 514.1505, found 514.1514.

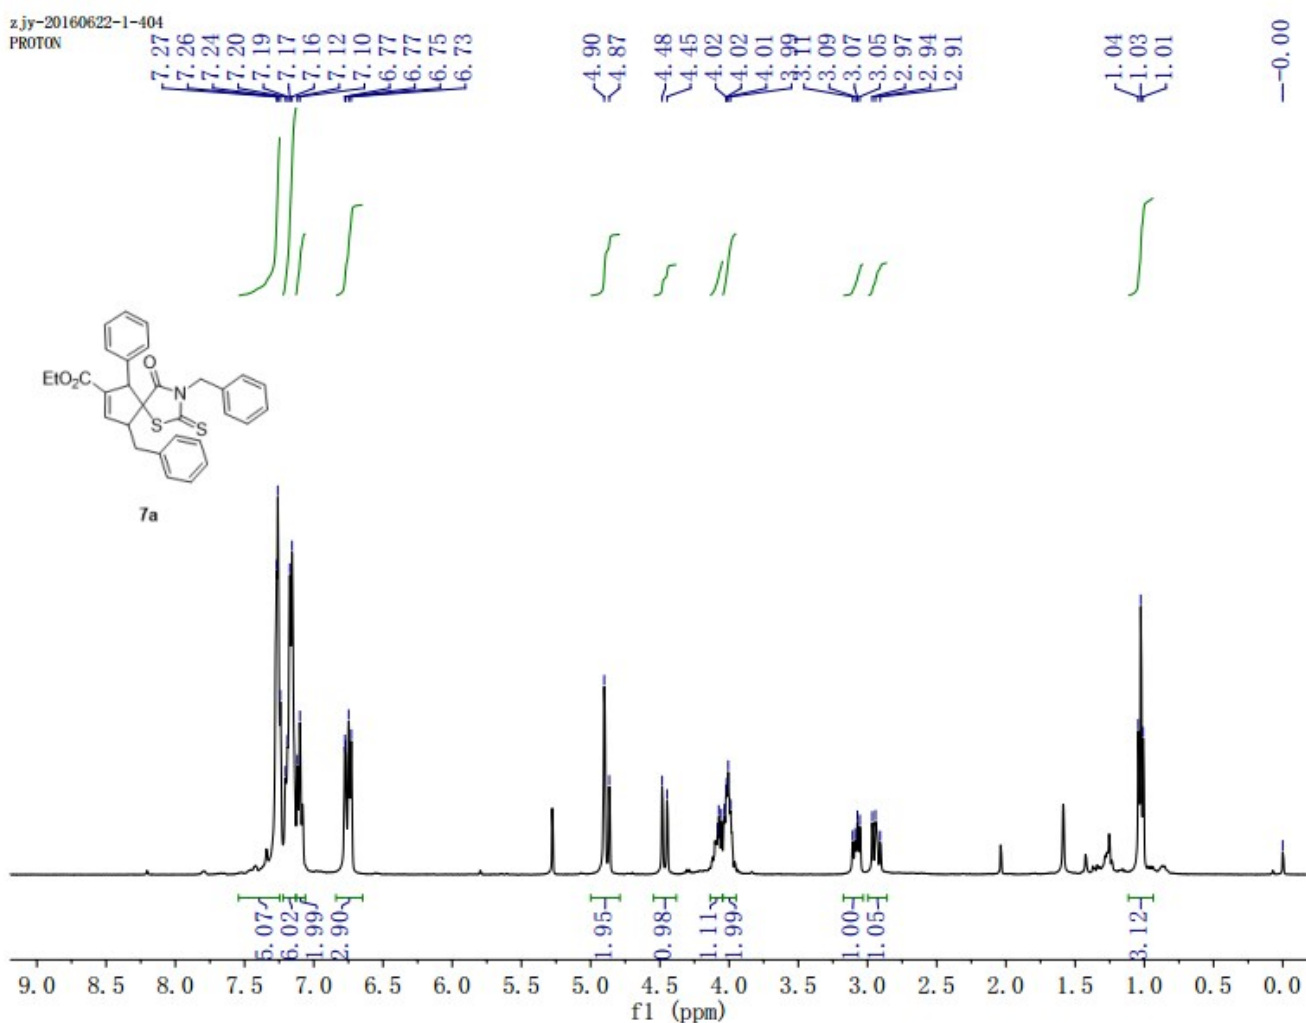

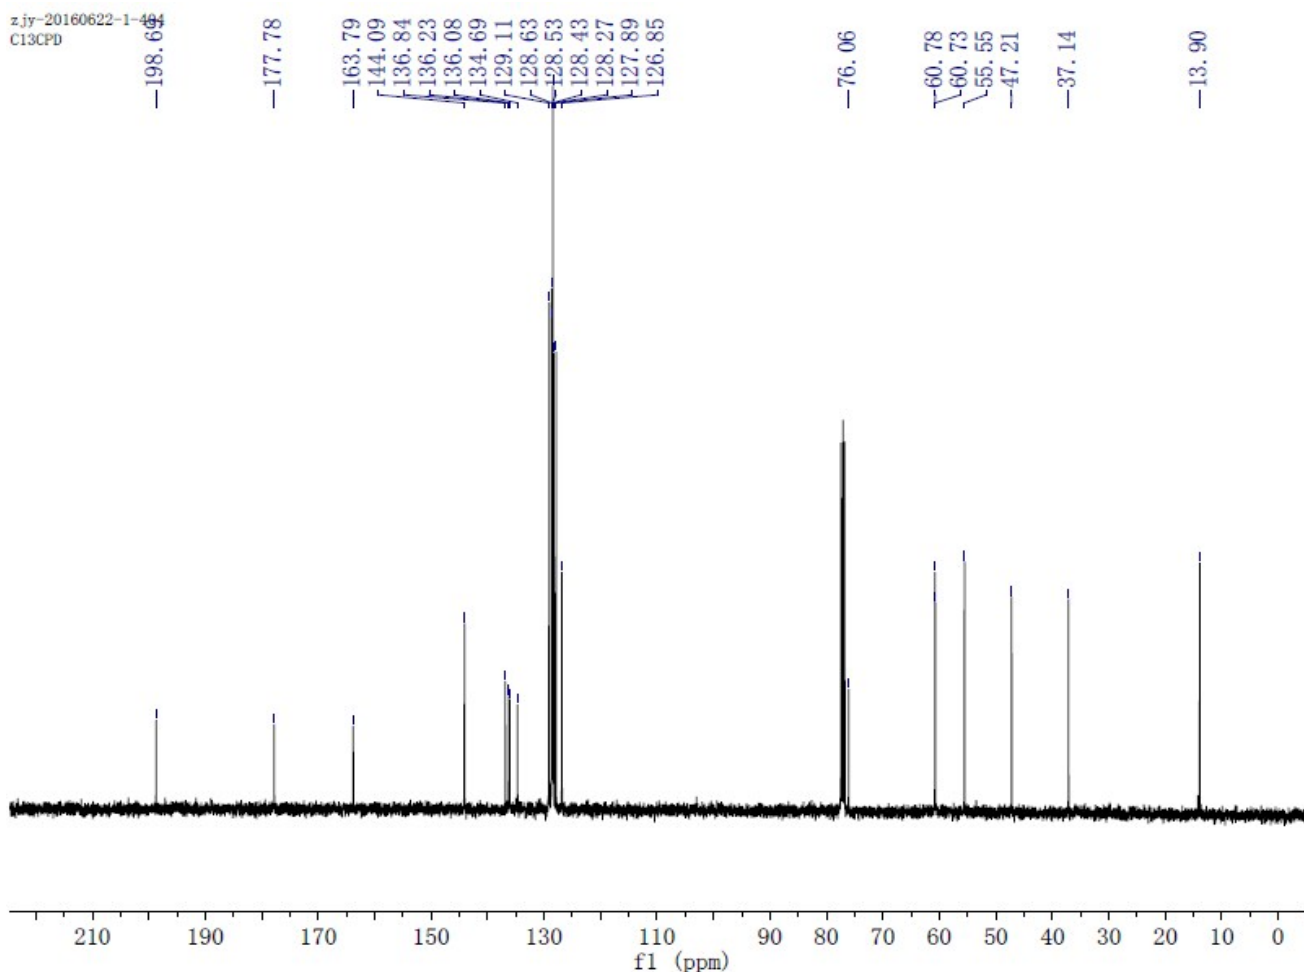

**Ethyl 9-benzyl-4-oxo-3-propyl-2-thioxo-6-(p-tolyl)-1-thia-3-azaspiro[4.4]non-7-ene-7-carboxylate**

**(7b):**

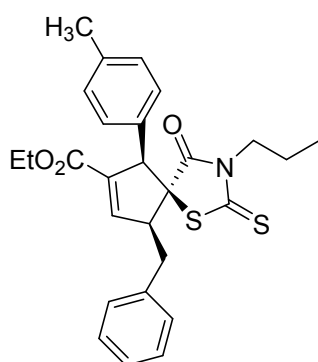

Yellow oil (37.9 mg, 79% yield);  $^1\text{H}$  NMR (400 MHz,  $\text{CDCl}_3$ ):  $\delta$  7.23 (d,  $J$  = 7.0 Hz, 2H), 7.17 (d,  $J$  = 7.5 Hz, 3H), 7.03 (d,  $J$  = 7.8 Hz, 2H), 6.81 (d,  $J$  = 7.9 Hz, 2H), 6.76 (d,  $J$  = 2.1 Hz, 1H), 4.95 (d,  $J$  = 41.2 Hz, 1H), 4.17-4.02 (m, 2H), 4.01-3.94 (m, 1H), 3.57 (ddd,  $J$  = 13.1, 9.1, 6.1 Hz, 1H), 3.45-3.30 (m, 1H), 3.05 (dd,  $J$  = 13.9, 7.4 Hz, 1H), 2.95 (dd,  $J$  = 13.9, 9.5 Hz, 1H), 2.28 (s, 3H), 1.44-1.32 (m, 2H), 1.08 (t,  $J$  = 7.1 Hz, 3H), 0.79 (t,  $J$  = 7.4 Hz, 3H);  $^{13}\text{C}$  NMR (101 MHz,  $\text{CDCl}_3$ ):  $\delta$  199.2, 178.1, 163.8, 144.0, 137.6, 137.0, 136.4, 133.3, 129.0, 129.0, 128.6, 128.3, 126.8, 76.0, 60.7, 60.6, 55.5, 45.9, 37.3, 21.2, 20.2, 14.0, 11.1; HRMS (ESI):  $m/z$  calcd for  $\text{C}_{27}\text{H}_{30}\text{NO}_3\text{S}_2$   $[\text{M}+\text{H}]^+$ : 480.1662, found 480.1665.





**Ethyl 9-benzyl-3-butyl-4-oxo-2-thioxo-6-(p-tolyl)-1-thia-3-azaspiro [4.4]non-7-ene-7-carboxylate**

(7c):

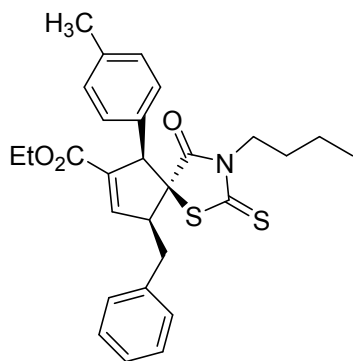

Yellow oil (37.5 mg, 76% yield);  $^1\text{H NMR}$  (400 MHz,  $\text{CDCl}_3$ ):  $\delta$  7.23 (d,  $J = 7.0$  Hz, 2H), 7.19-7.12 (m, 3H), 7.03 (d,  $J = 7.9$  Hz, 2H), 6.80 (d,  $J = 8.0$  Hz, 2H), 6.75 (t,  $J = 2.3$  Hz, 1H), 4.88 (t,  $J = 2.4$  Hz, 1H), 4.15-4.01 (m, 2H), 3.98 (ddd,  $J = 9.5, 6.3, 2.6$  Hz, 1H), 3.61 (ddd,  $J = 13.2, 9.0, 5.9$  Hz, 1H), 3.49-3.37 (m, 1H), 3.04 (dd,  $J = 13.9, 7.4$  Hz, 1H), 2.94 (dd,  $J = 13.9, 9.5$  Hz, 1H), 2.28 (s, 3H), 1.35-1.26 (m, 2H), 1.23-1.13 (m, 2H),

1.07 (t,  $J = 7.1$  Hz, 3H), 0.87 (t,  $J = 7.2$  Hz, 3H);  $^{13}\text{C NMR}$  (101 MHz,  $\text{CDCl}_3$ ):  $\delta$  199.1, 178.0, 163.8, 144.0, 137.6, 137.0, 136.4, 133.3, 129.0, 129.0, 128.6, 128.4, 126.8, 75.9, 60.7, 60.6, 55.5, 44.3, 37.3, 28.8, 21.2, 19.9, 14.0, 13.7; HRMS (ESI):  $m/z$  calcd for  $\text{C}_{28}\text{H}_{32}\text{NO}_3\text{S}_2$   $[\text{M}+\text{H}]^+$ : 494.1818, found 494.1823.

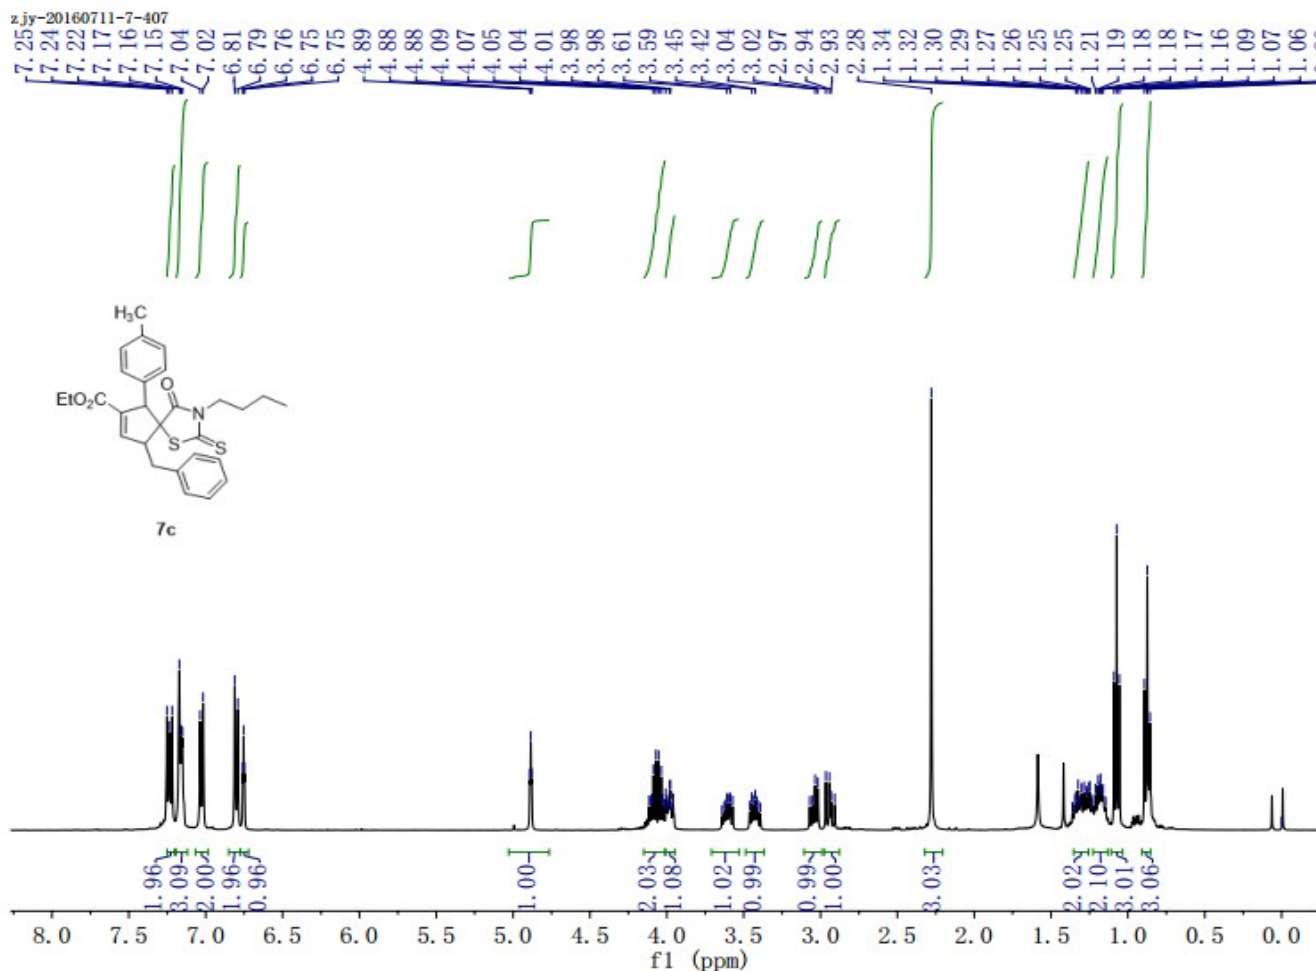



zjy-20160711-7\_407  
13CPD

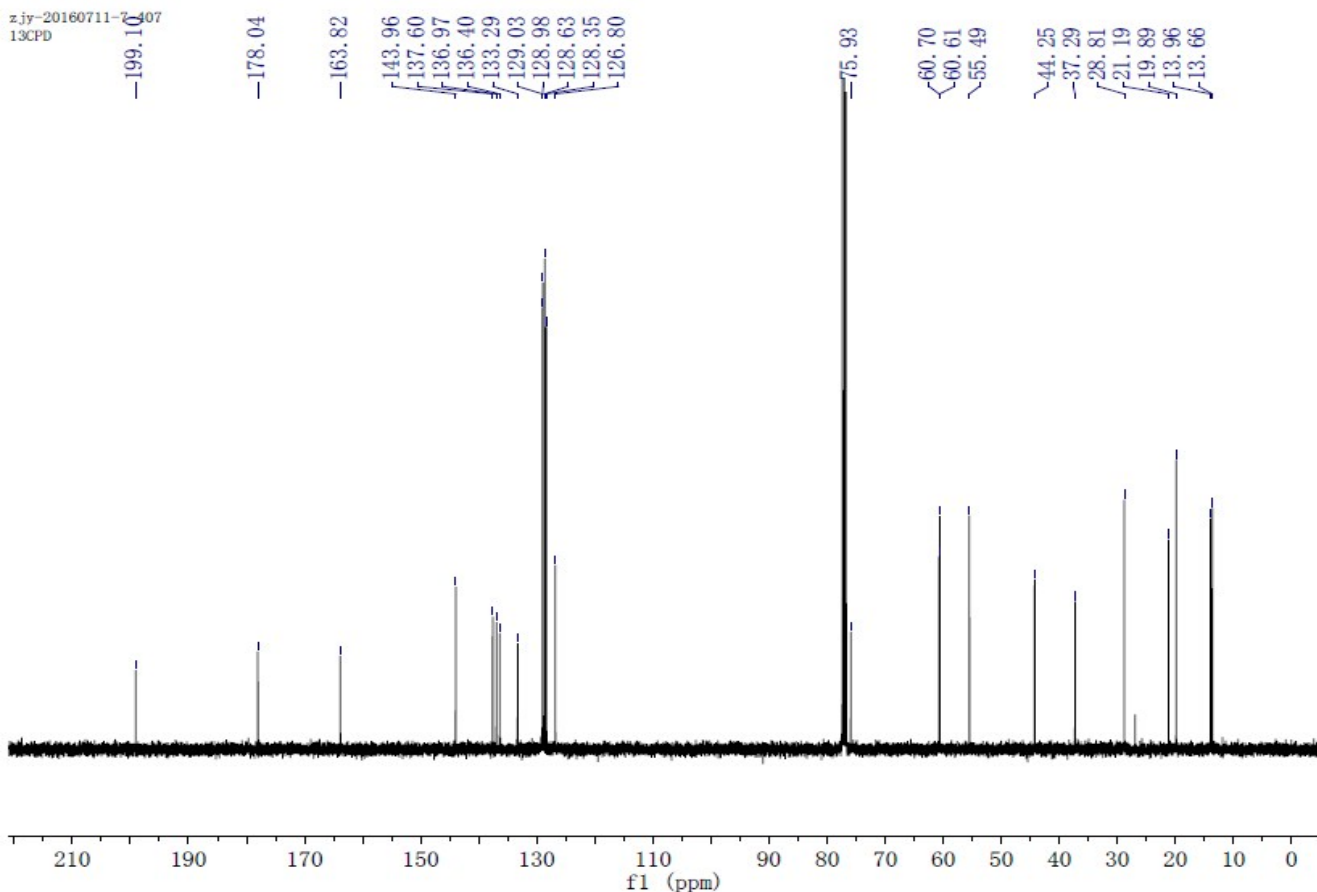

**Ethyl 9-benzyl-3-butyl-6-(4-ethylphenyl)-4-oxo-2-thioxo-1-thia-3-azaspiro[4.4]non-7-ene-7-carboxylate (7d):**

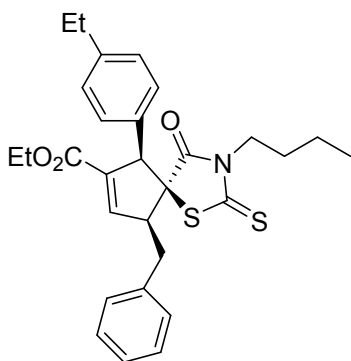

Yellow oil (37.5 mg, 74% yield);  $^1\text{H}$  NMR (400 MHz,  $\text{CDCl}_3$ ):  $\delta$  7.23 (s, 1H), 7.17 (dd,  $J = 5.0, 2.5$  Hz, 4H), 7.04 (t,  $J = 8.9$  Hz, 2H), 6.83 (d,  $J = 8.0$  Hz, 2H), 6.76 (t,  $J = 2.3$  Hz, 1H), 4.91 (dd,  $J = 18.3, 16.0$  Hz, 1H), 4.18 (dd,  $J = 14.3, 7.2$  Hz, 1H), 4.07-3.96 (m, 2H), 3.62 (ddd,  $J = 13.1, 8.9, 6.0$  Hz, 1H), 3.51-3.32 (m, 2H), 3.05 (dd,  $J = 13.9, 7.4$  Hz, 1H), 2.99-2.89 (m, 2H), 2.59 (q,  $J = 7.6$  Hz, 2H), 1.25 (d,  $J = 7.1$  Hz, 2H), 1.17 (d,  $J = 7.6$  Hz, 3H), 1.06 (t,  $J = 7.1$  Hz, 3H), 0.92-0.82 (m, 3H);  $^{13}\text{C}$  NMR (101 MHz,  $\text{CDCl}_3$ ):  $\delta$  199.1, 178.0, 163.8, 144.0, 137.0, 133.5, 129.0, 128.6, 128.5, 128.3, 127.7, 126.8, 126.3, 76.0, 60.7, 60.6, 55.5, 49.5, 44.2, 37.3, 28.8, 19.9, 15.3, 13.9, 13.7; HRMS (ESI):  $m/z$  calcd for  $\text{C}_{29}\text{H}_{34}\text{NO}_3\text{S}_2$   $[\text{M}+\text{H}]^+$ : 508.1975, found 508.1976.

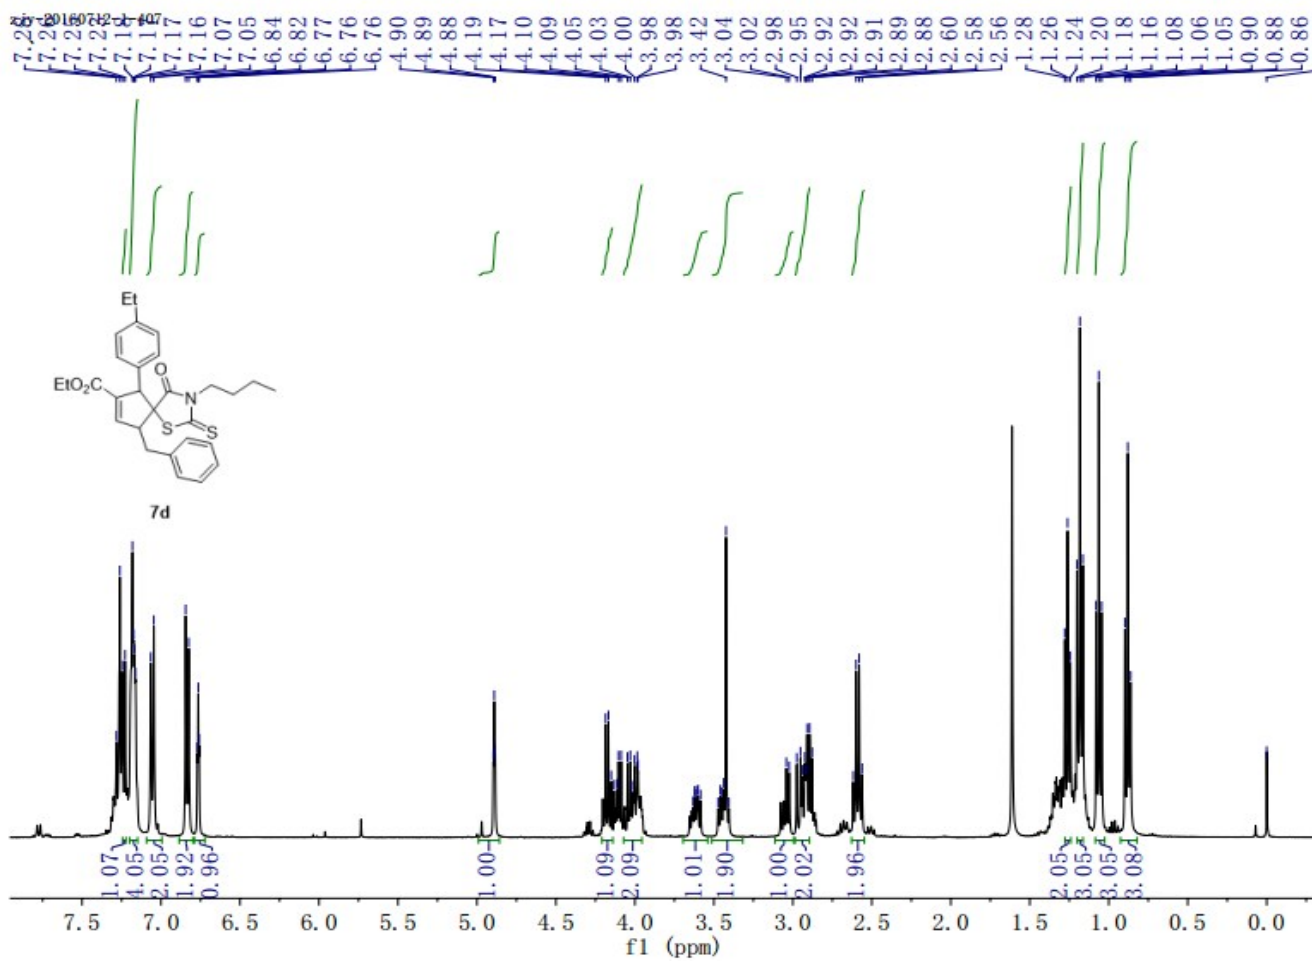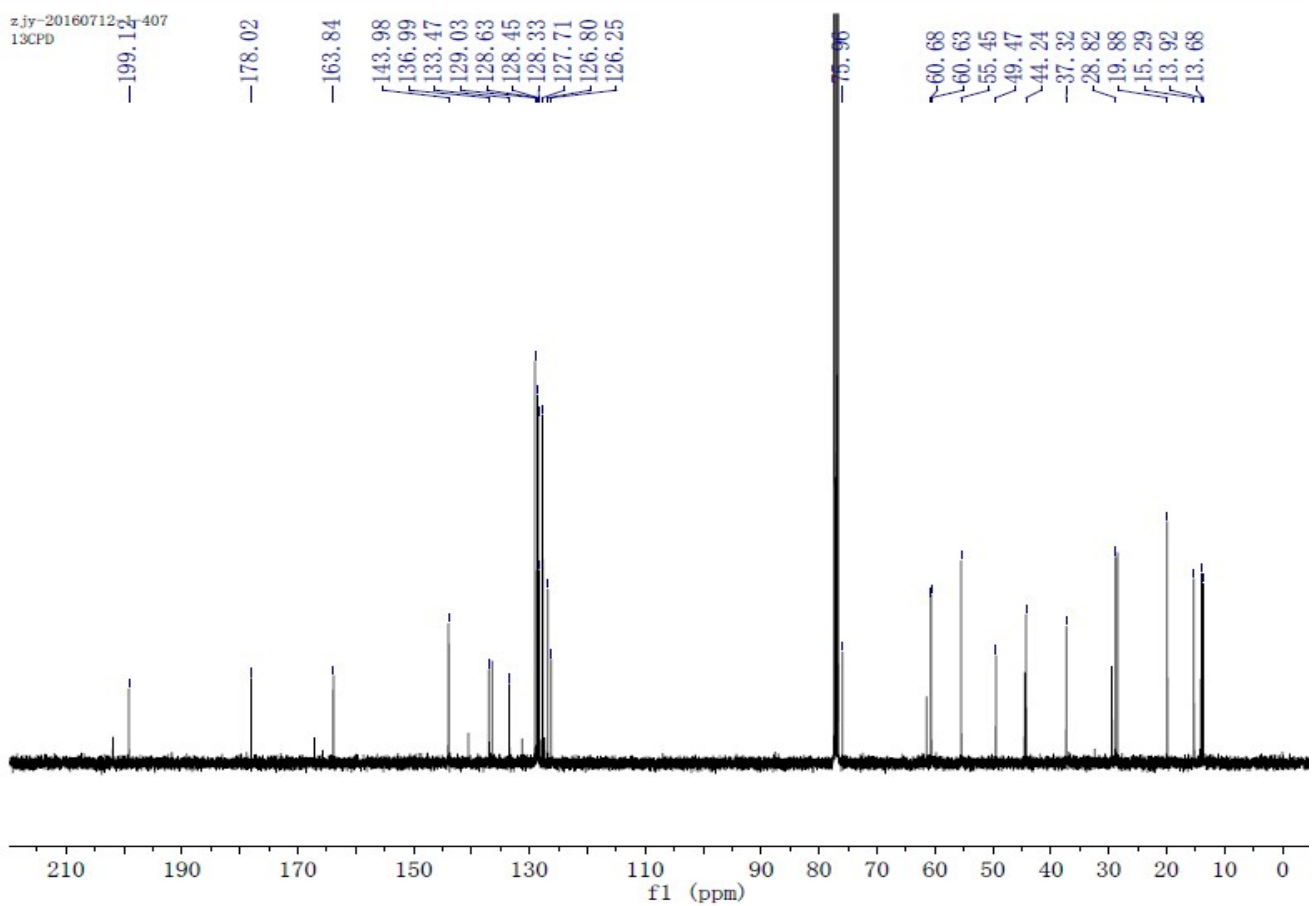

**Ethyl 9-benzyl-6-(4-fluorophenyl)-4-oxo-3-propyl-2-thioxo-1-thia-3-azaspiro[4.4]non-7-ene-7-carboxylate (7e):**

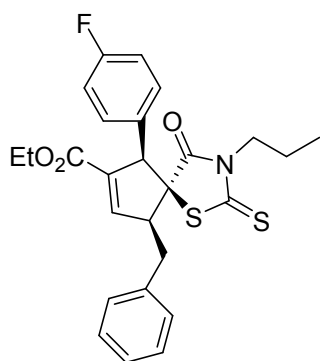

Yellow oil (44.4 mg, 92% yield);  $^1\text{H}$  NMR (400 MHz,  $\text{CDCl}_3$ ):  $\delta$  7.26 (d,  $J = 7.0$  Hz, 2H), 7.19 (t,  $J = 6.1$  Hz, 3H), 6.99-6.89 (m, 4H), 6.82 (t,  $J = 2.4$  Hz, 1H), 4.94 (t,  $J = 2.6$  Hz, 1H), 4.18-4.10 (m, 1H), 4.05 (ddd,  $J = 16.8, 9.6, 6.7$  Hz, 2H), 3.56 (ddd,  $J = 13.0, 9.2, 6.1$  Hz, 1H), 3.36 (ddd,  $J = 13.0, 9.2, 6.0$  Hz, 1H), 3.11 (dd,  $J = 14.0, 7.0$  Hz, 1H), 2.97 (dd,  $J = 14.0, 9.8$  Hz, 1H), 1.40-1.31 (m, 2H), 1.10 (t,  $J = 7.1$  Hz, 3H), 0.80 (t,  $J = 7.4$  Hz, 3H);  $^{13}\text{C}$  NMR (101 MHz,  $\text{CDCl}_3$ ):  $\delta$  198.5, 177.7, 163.5, 144.6, 136.7, 136.0, 130.3, 130.2, 129.0, 128.6, 126.9, 115.3, 115.1, 76.2, 60.8, 60.2, 55.3, 45.9, 37.0, 20.2, 13.9, 11.1;  $^{19}\text{F}$  NMR (376 MHz,  $\text{CDCl}_3$ )  $\delta$  -113.86; HRMS (ESI):  $m/z$  calcd for  $\text{C}_{26}\text{H}_{27}\text{FNO}_3\text{S}_2$   $[\text{M}+\text{H}]^+$ : 484.1411, found 484.1408.

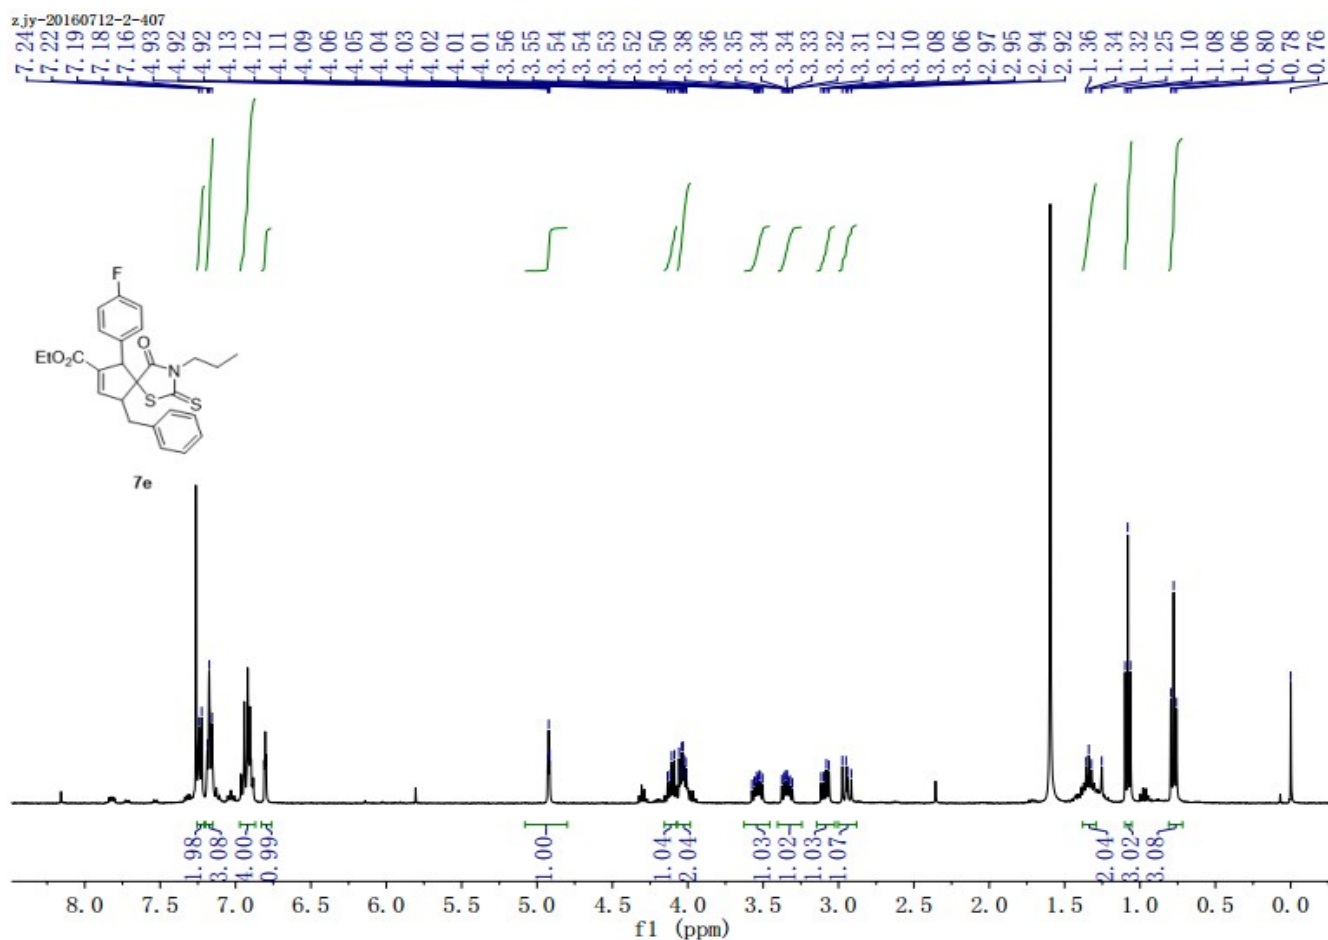

zjy-20160711-4-404  
C13CPD

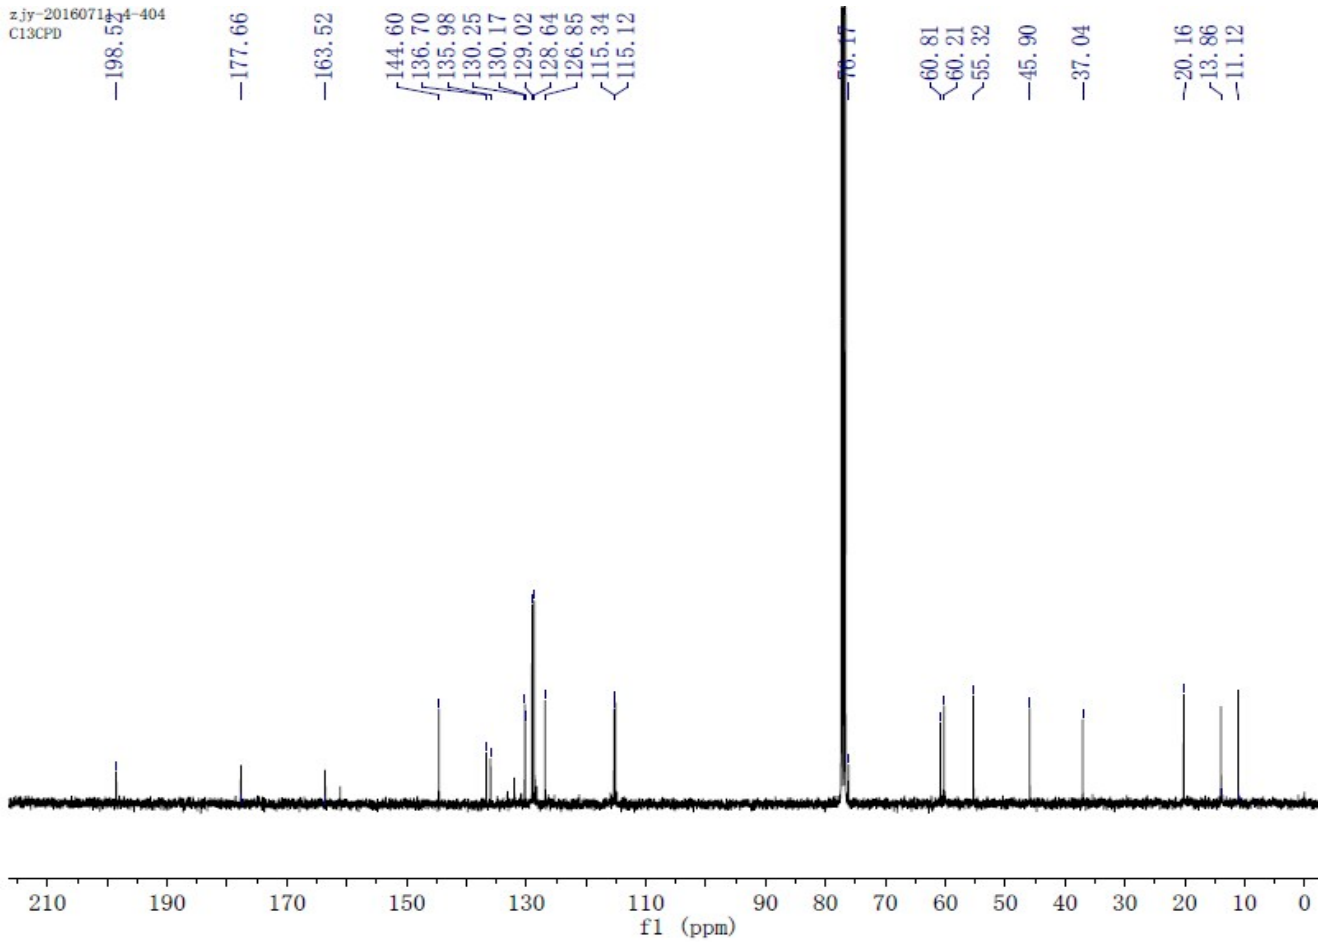

zjy-20160711-5-403  
F19

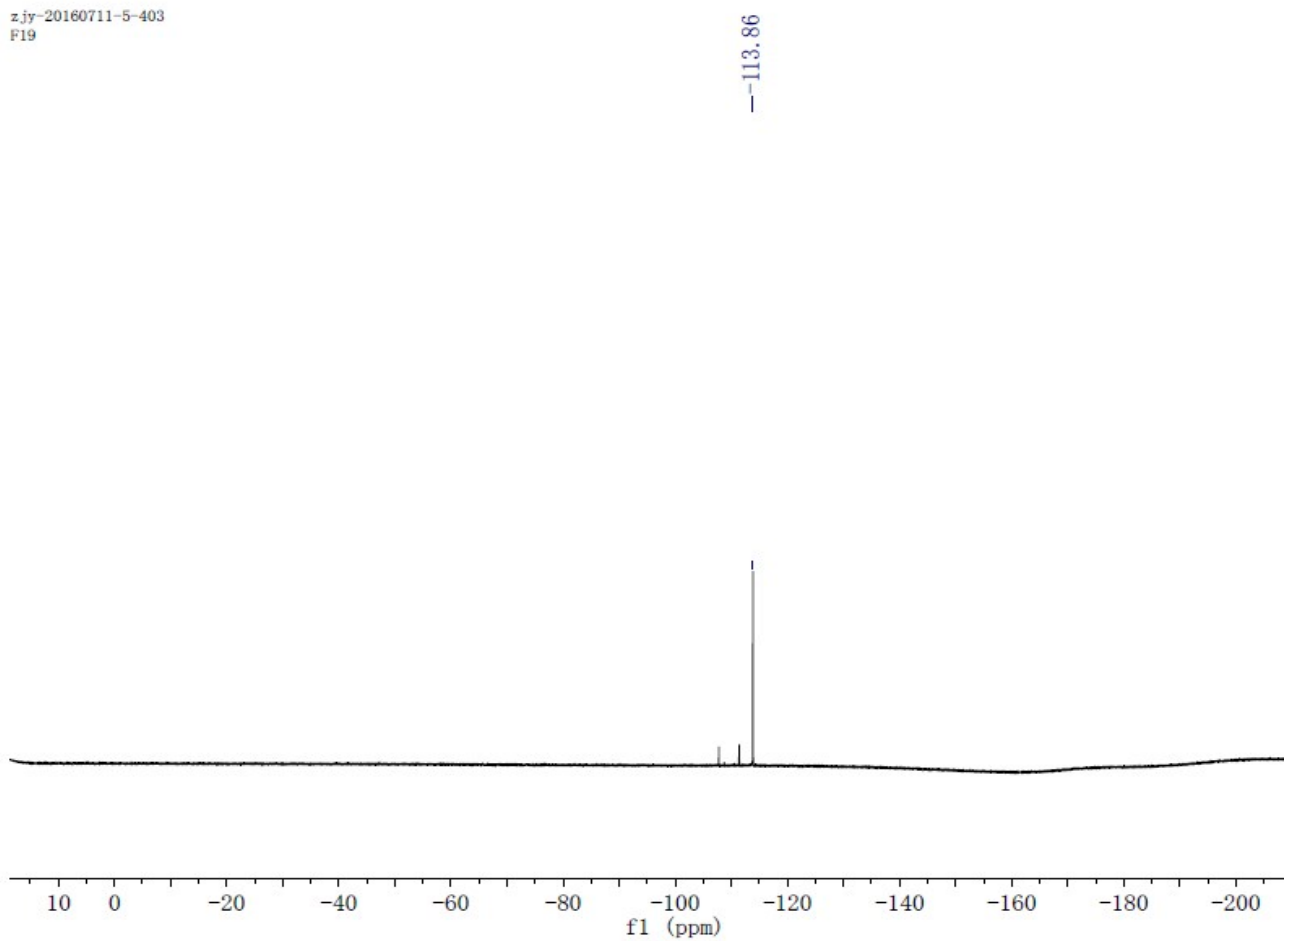

**Ethyl 9-benzyl-4-oxo-6-phenyl-3-propyl-2-thioxo-1-thia-3-azaspiro [4.4]non-7-ene-7-carboxylate**

(7f):

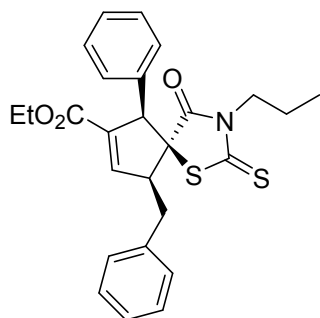

Yellow oil (41.4 mg, 89% yield);  $^1\text{H NMR}$  (400 MHz,  $\text{CDCl}_3$ ):  $\delta$  7.25-7.20 (m, 5H), 7.19-7.12 (m, 3H), 6.91 (dd,  $J = 6.7, 2.8$  Hz, 2H), 6.81-6.75 (m, 1H), 4.93 (t,  $J = 2.6$  Hz, 1H), 4.09 (dd,  $J = 10.8, 7.1$  Hz, 1H), 4.05-3.96 (m, 2H), 3.55 (ddd,  $J = 13.0, 9.2, 6.1$  Hz, 1H), 3.44-3.30 (m, 1H), 3.07 (dd,  $J = 14.0, 7.3$  Hz, 1H), 2.94 (dd,  $J = 13.9, 9.6$  Hz, 1H), 1.44-1.30 (m, 2H), 1.04 (t,  $J = 7.1$  Hz, 3H), 0.77 (t,  $J = 7.4$  Hz, 3H);  $^{13}\text{C NMR}$  (101 MHz,  $\text{CDCl}_3$ ):  $\delta$  199.0, 177.9, 163.8, 144.3, 136.9, 136.3, 129.0, 128.6, 128.5, 128.3, 128.0, 126.8, 76.0, 61.0, 60.7, 55.5, 45.9, 37.2, 20.2, 13.9, 11.1; HRMS (ESI):  $m/z$  calcd for  $\text{C}_{26}\text{H}_{28}\text{NO}_3\text{S}_2$   $[\text{M}+\text{H}]^+$ : 466.1505, found 466.1514.

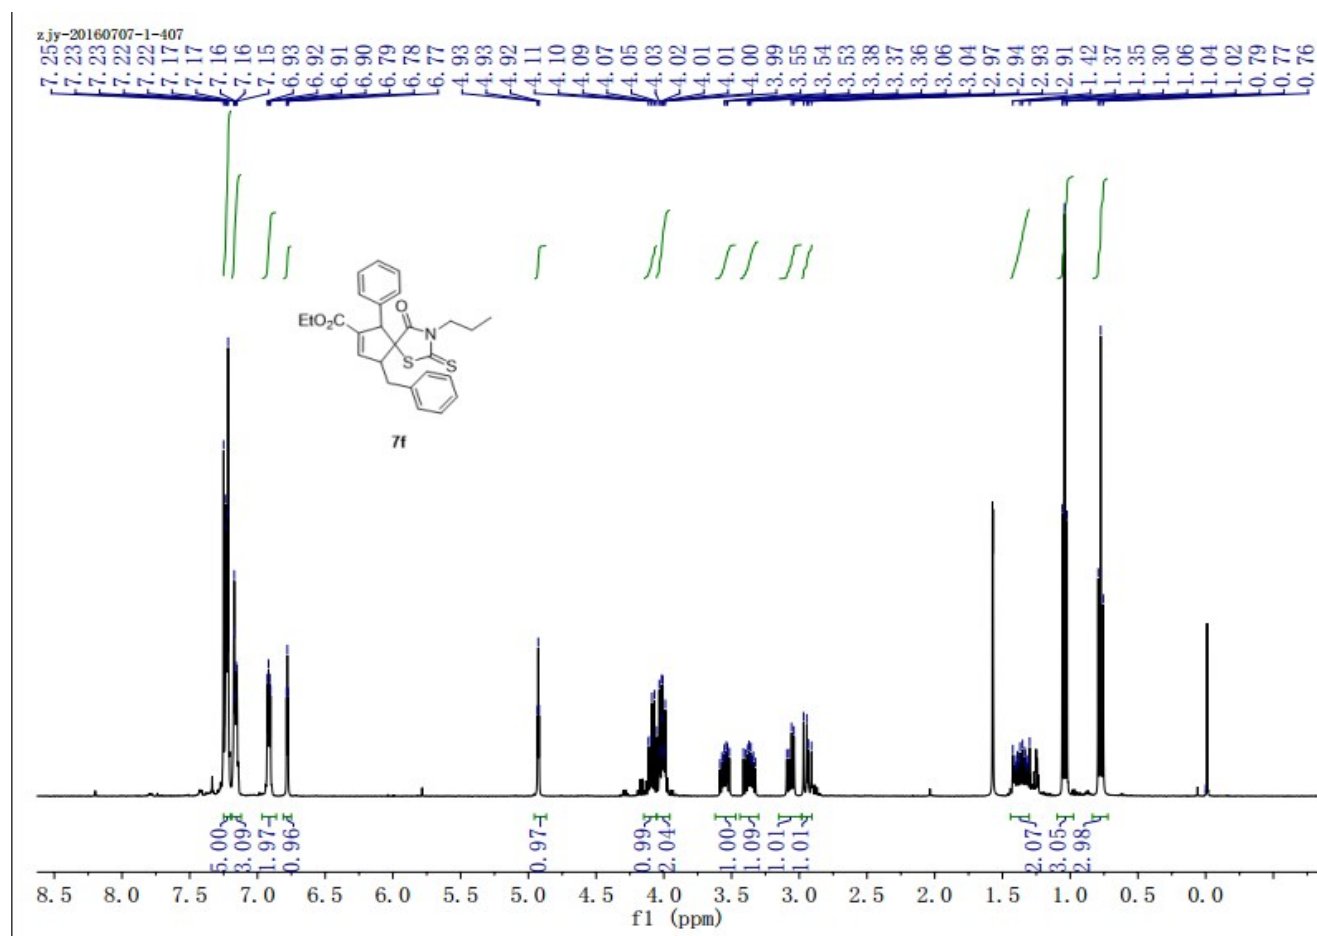

zjy-20160706-1-401  
C13CPD

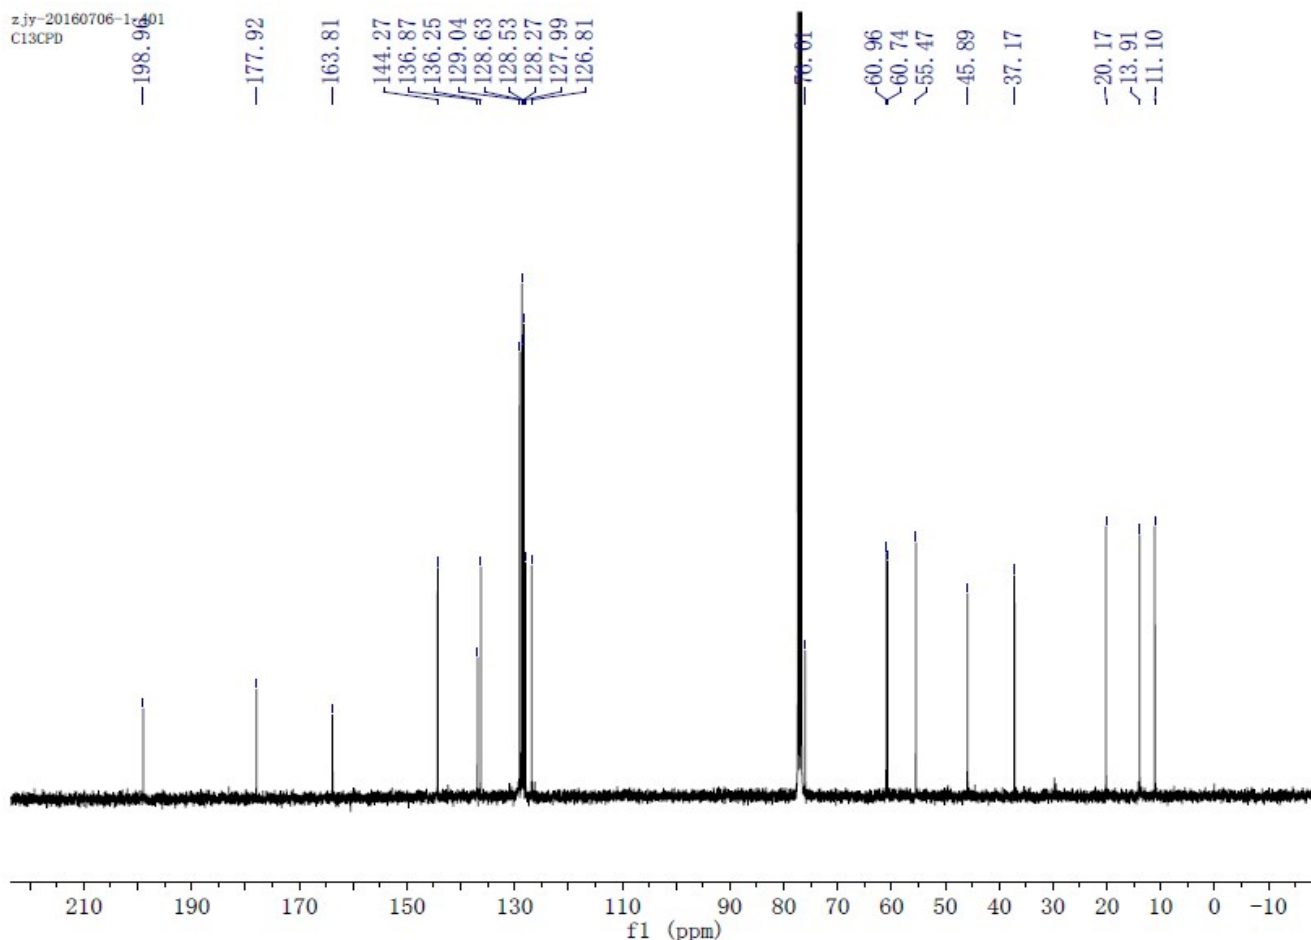

**Ethyl 9-benzyl-3-butyl-4-oxo-6-phenyl-2-thioxo-1-thia-3-azaspiro [4.4]non-7-ene-7-carboxylate (7g):**

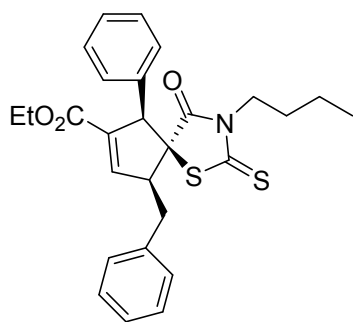

Yellow oil (41.7 mg, 87% yield);  $^1\text{H}$  NMR (400 MHz,  $\text{CDCl}_3$ ):  $\delta$  7.24 (dd,  $J = 8.5, 5.0$  Hz, 5H), 7.17 (d,  $J = 6.5$  Hz, 3H), 6.92 (dd,  $J = 6.5, 2.8$  Hz, 2H), 6.79 (t,  $J = 2.3$  Hz, 1H), 4.93 (s, 1H), 4.22-4.10 (m, 1H), 4.07-3.94 (m, 2H), 3.60 (ddd,  $J = 13.3, 9.0, 5.8$  Hz, 1H), 3.48-3.38 (m, 1H), 3.07 (dd,  $J = 14.0, 7.2$  Hz, 1H), 2.92 (ddd,  $J = 15.9, 13.5, 7.8$  Hz, 2H), 1.47-

1.28 (m, 2H), 1.23-1.14 (m, 2H), 1.05 (t,  $J = 7.1$  Hz, 3H), 0.88 (t,  $J = 7.2$  Hz, 3H);  $^{13}\text{C}$  NMR (101 MHz,  $\text{CDCl}_3$ ):  $\delta$  198.9, 177.9, 163.8, 144.2, 136.9, 136.3, 129.0, 128.6, 128.5, 128.3, 128.2, 128.0, 126.8, 126.3, 75.8, 61.0, 60.7, 55.4, 44.3, 37.2, 28.8, 19.9, 13.9, 13.6; HRMS (ESI):  $m/z$  calcd for  $\text{C}_{27}\text{H}_{30}\text{NO}_3\text{S}_2$   $[\text{M}+\text{H}]^+$ : 480.1662, found 480.1667.

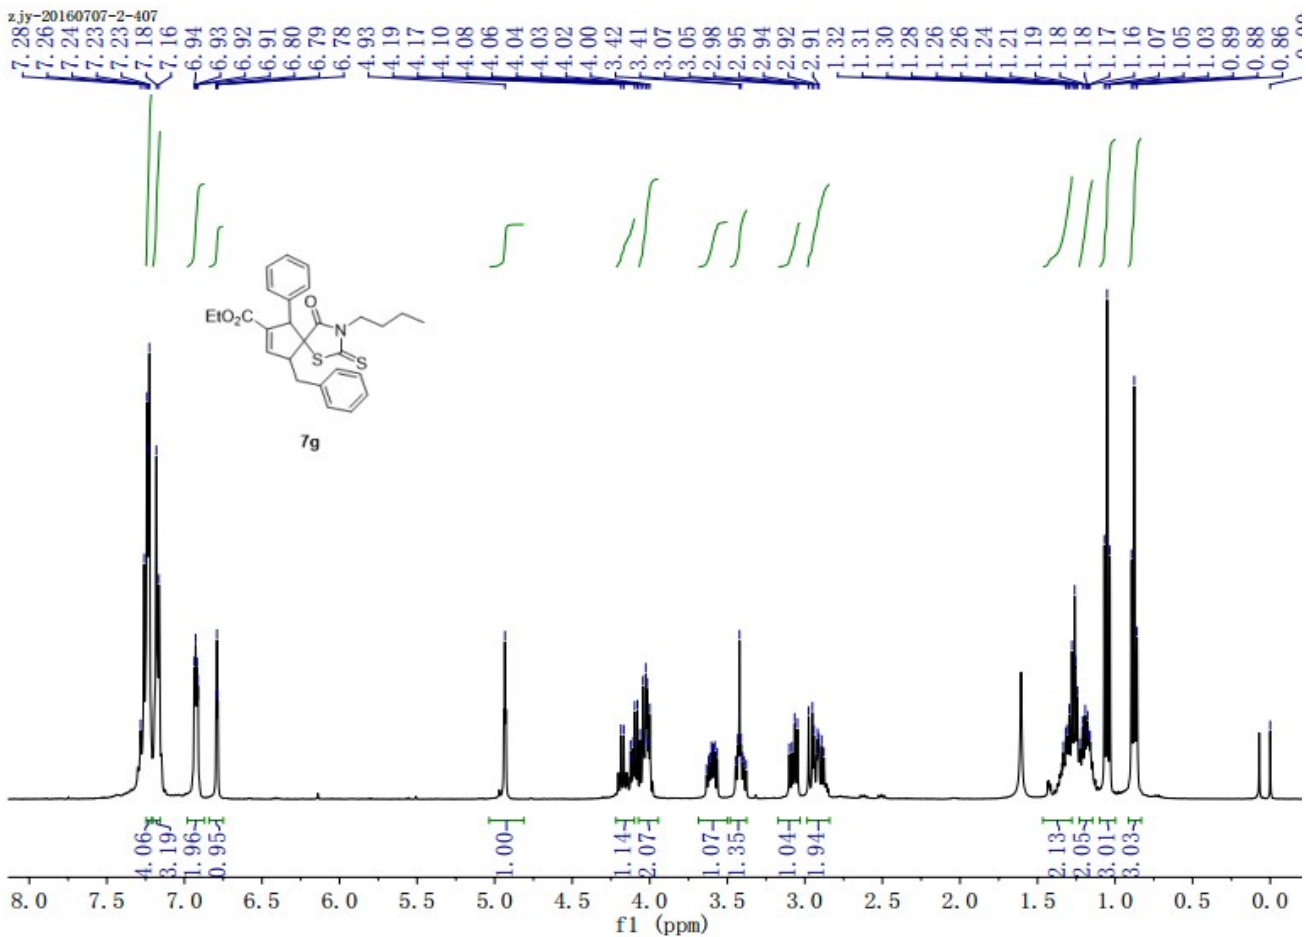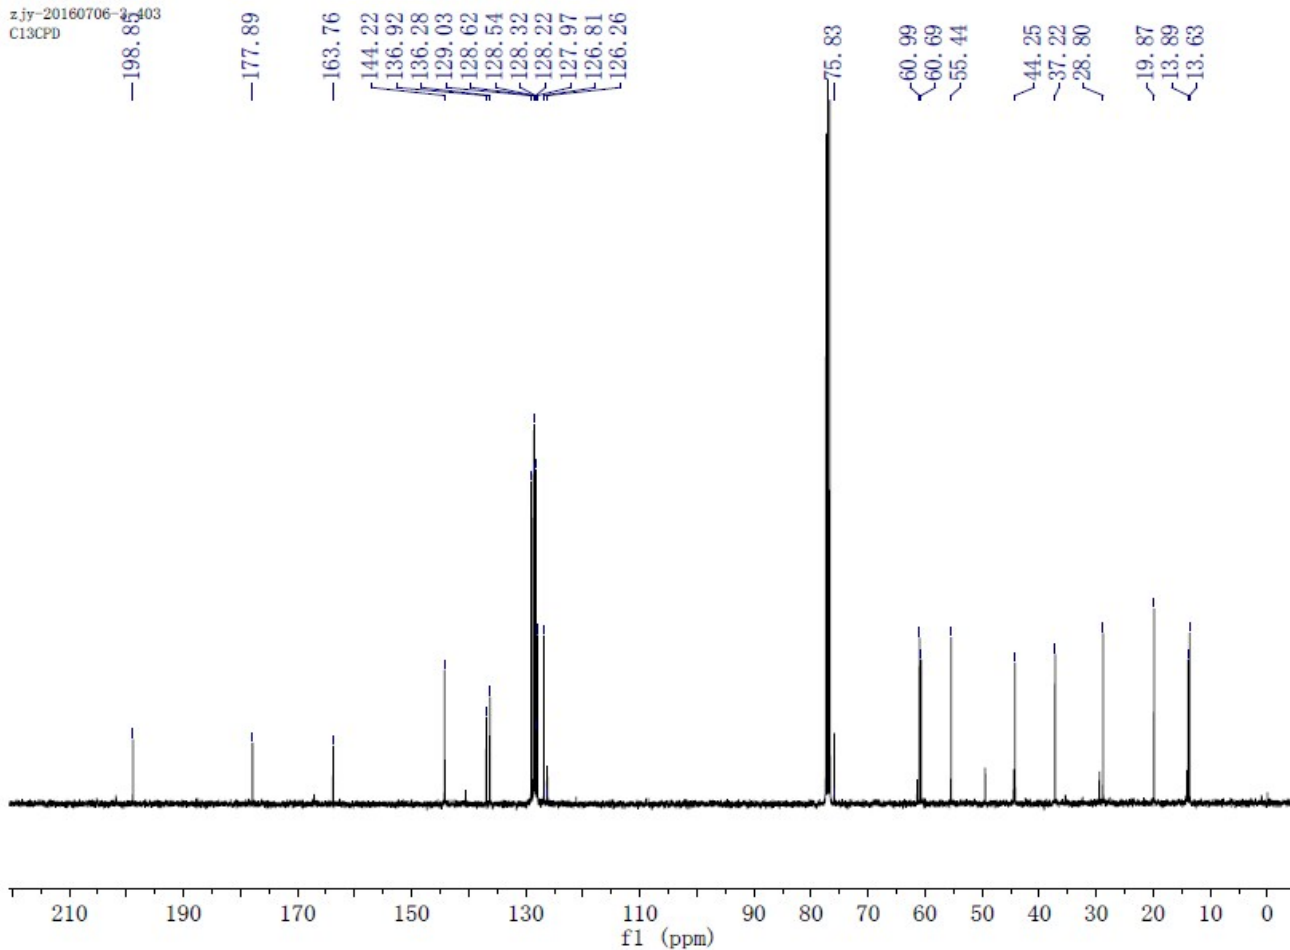



## X-ray crystallographic data of compound **3I**

Crystallographic data for the structural analysis of compound **3I** has been deposited at the Cambridge Crystallographic Data Centre as No. CCDC 1494917. These data can be obtained free of charge by contacting The Cambridge Crystallographic Data Centre, 12, Union Road, Cambridge CB2 1EZ, UK; fax: +44 1223 336033; E-mail: [deposit@ccdc.cam.ac.uk](mailto:deposit@ccdc.cam.ac.uk).

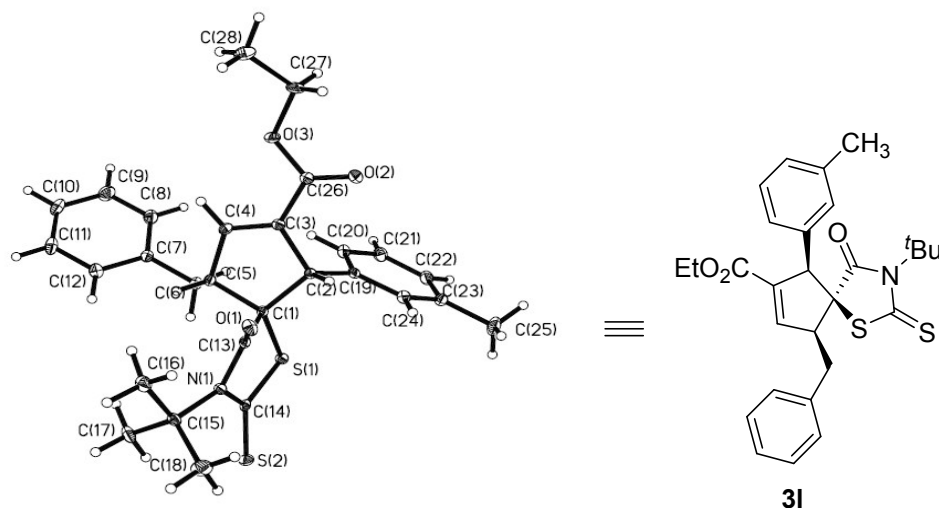

Table 1. Crystal data and structure refinement for shelxl.

|                             |                                                                |                       |
|-----------------------------|----------------------------------------------------------------|-----------------------|
| Identification code         | shelxl                                                         |                       |
| Empirical formula           | C <sub>28</sub> H <sub>31</sub> NO <sub>3</sub> S <sub>2</sub> |                       |
| Formula weight              | 493.66                                                         |                       |
| Temperature                 | 113(2) K                                                       |                       |
| Wavelength                  | 0.71073 Å                                                      |                       |
| Crystal system, space group | Triclinic, P-1                                                 |                       |
| Unit cell dimensions        | a = 10.588(2) Å                                                | alpha = 76.88(3) deg. |
|                             | b = 10.777(2) Å                                                | beta = 77.78(3) deg.  |
|                             | c = 12.326(3) Å                                                | gamma = 72.35(3) deg. |
| Volume                      | 1289.7(5) Å <sup>3</sup>                                       |                       |
| Z                           | 2                                                              |                       |
| Calculated density          | 1.271 Mg/m <sup>3</sup>                                        |                       |
| Absorption coefficient      | 0.236 mm <sup>-1</sup>                                         |                       |



|                                   |                                             |
|-----------------------------------|---------------------------------------------|
| F(000)                            | 524                                         |
| Crystal size                      | 0.20 x 0.18 x 0.12 mm                       |
| Theta range for data collection   | 2.04 to 27.92 deg.                          |
| Limiting indices                  | -13<=h<=13, -14<=k<=14, -15<=l<=16          |
| Reflections collected / unique    | 13062 / 6028 [R(int) = 0.0359]              |
| Completeness to theta = 27.92     | 97.7 %                                      |
| Absorption correction             | Semi-empirical from equivalents             |
| Max. and min. transmission        | 0.9722 and 0.9543                           |
| Refinement method                 | Full-matrix least-squares on F <sup>2</sup> |
| Data / restraints / parameters    | 6028 / 0 / 312                              |
| Goodness-of-fit on F <sup>2</sup> | 1.013                                       |
| Final R indices [I>2sigma(I)]     | R1 = 0.0393, wR2 = 0.1063                   |
| R indices (all data)              | R1 = 0.0538, wR2 = 0.1132                   |
| Largest diff. peak and hole       | 0.602 and -0.365 e.A <sup>-3</sup>          |
